# Supplementary material for: Pre-Treatment Biomarkers of Anti-Tumour Necrosis Factor Therapy Response in Crohn’s Disease—A Systematic Review and Gene Ontology Analysis
Source: MDPI journal article supplement (doi:10.3390/cells8060515), 2019-05-28
Supplement: s1 [file s1]

### *Study selection*

We performed study selection in several rounds. First, we automatically excluded publications not reporting novel measurements in patients, i.e. comments, editorials, meta-analysis, reviews and systematic reviews. Also excluded were studies with a sample size <5 (i.e. case reports) as well as retracted publications and retractions of publications.

For further selection, we screened the studies' titles and abstracts. We excluded obviously irrelevant studies, studies focusing solely on Ulcerose colitis and paediatric IBD and studies reporting only experimental (animal, *in vitro*) data.

We retrieved the remaining studies in full text and screened them further. We excluded publications reporting on pharmacokinetics (therapeutic drug monitoring), anti-therapeutic antibodies, treatment regimes, microbiota, patients' lifestyle and other response predictors other than genetic and expression.

In the final round of selection, we excluded studies reporting expression biomarkers measured after the therapy start, those not comparing responders to anti-TNF therapy and nonresponding patients (i.e. comparing responders/non-responders to untreated patients or healthy controls) and studies where data on CD patients could not be discriminated from IBD data.

### *Gene ontology (GO) analysis*

We used CytoScape's ClueGO plug-in for GO analysis. We searched for EBI-UniProt-GOA GO ontologies and pathways (Molecular Function, Biological Process, Cellular Component and Immune System Process). We allowed all experimental evidence. Network specificity was set at medium. We made separated GO term selection of enriched and depleted terms with right-sided and left-sided hypergeometric test, respectively. We used Bonferroni step-down to correct the p-values for multiple testing. Level of significance was set at corrected  $p < 0.05$ .
