# Supplementary material for: Pre-Treatment Biomarkers of Anti-Tumour Necrosis Factor Therapy Response in Crohn’s Disease—A Systematic Review and Gene Ontology Analysis
Source: MDPI journal article supplement (doi:10.3390/cells8060515), 2019-05-28
Supplement: s1 [file s1]

**Supplementary Table S1.** Publications included in the systematic review.

| reference | patients included | therapy used | response definition | response   | tissue       | data type | methods                         | data extracted | PMID          |
|-----------|-------------------|--------------|---------------------|------------|--------------|-----------|---------------------------------|----------------|---------------|
| [55]      | 75                | IFX          | CDAI, IBDQ          | Short-term | N.D.         | DNA       | allele-specific hybridization   | no             | PMID:11313304 |
| [57]      | 90                | IFX          | CDAI                | Short-term | blood        | DNA       | allele-specific PCR             | yes            | PMID:12049175 |
| [63]      | 254               | IFX          | CDAI, cl.ass.       | Short-term | N.D.         | DNA       | allele-specific PCR             | no             | PMID:12105838 |
| [34]      | 153               | IFX          | CDAI                | Short-term | serum        | protein   | ELISA                           | yes            | PMID:12190096 |
|           | 226               |              |                     |            | blood        | DNA       | allele-specific PCR             |                |               |
| [45]      | 36                | IFX          | cl.ass.             | Short-term | serum        | protein   | ELISA                           | yes            | PMID:12358255 |
| [64]      | 534               | IFX          | CDAI                | Short-term | blood        | DNA       | allele-specific PCR             | no             | PMID:12360101 |
| [23]      | 200               | IFX          | CDAI                | Short-term | N.D.         | DNA       | allele-specific PCR             | yes            | PMID:14987319 |
| [65]      | 166               | IFX          | CDAI                | Short-term | blood        | DNA       | PCR-RFLP                        | yes            | PMID:15274667 |
| [28]      | 40                | IFX          | CDAI                | Short-term | N.D.         | DNA       | allele-specific PCR             | yes            | PMID:15754402 |
| [21]      | 259               | IFX          | CDAI                | Short-term | PBMCs        | DNA       | PCR-RFLP                        | yes            | PMID:16181301 |
| [66]      | 478               | IFX          | cl.ass.             | Short-term | PBMCs        | DNA       | PCR-DHPLC                       | no             | PMID:16305727 |
| [67]      | 206               | IFX          | CDAI                | Short-term | blood        | DNA       | allele-specific PCR, RFLP       | no             | PMID:16344720 |
| [22]      | 214               | IFX          | CDAI                | Short-term | N.D.         | DNA       | allele-specific PCR, sequencing | no             | PMID:16609369 |
| [68]      | 222               | IFX          | CDAI                | Short-term | N.D.         | DNA       | allele-specific PCR, sequencing | yes            | PMID:17001292 |
| [69]      | 344               | IFX          | CDAI                | Short-term | N.D.         | DNA       | allele-specific PCR             | no             | PMID:17108815 |
| [70]      | 265               | IFX          | CDAI                | Short-term | blood        | DNA       | allele-specific PCR             | no             | PMID:17505995 |
| [71]      | 80                | IFX          | HBI                 | Short-term | PBMCs        | DNA       | allele-specific hybridization   | yes            | PMID:18248655 |
| [72]      | 20                | IFX          | CDAI                | Short-term | serum        | protein   | SELDI-TOF, ELISA                | no             | PMID:18489908 |
| [73]      | 199               | IFX          | HBI                 | Short-term | blood        | DNA       | allele-specific PCR, PCR-RFLP   | no             | PMID:19693669 |
| [12]      | 37                | IFX          | cl.ass.             | Short-term | colon mucosa | RNA       | microarray                      | yes            | PMID:19956723 |
| [42]      | 40                | IFX          | CDAI                | Short-term | colon mucosa | protein   | IHC                             | no             | PMID:20188102 |
|           |                   |              |                     |            | serum        |           | ELISA                           | yes            |               |
| [44]      | 20                | IFX          | CDAI                | Short-term | serum        | protein   | ELISA                           | yes            | PMID:20848485 |
| [30]      | 37                | IFX          | cl.ass.             | Short-term | colon mucosa | RNA       | microarray, qRT-PCR             | yes            | PMID:20848504 |
| [74]      | 268               | IFX          | cl.ass.             | Long-term  | serum        | protein   | ELISA                           | no             | PMID:21334460 |
| [75]      | 185               | IFX / ADM    | CDAI                | Short-term | PBMCs        | DNA       | sequencing                      | no             | PMID:22147245 |
| [35]      | 385               | IFX          | CDAI                | Short-term | serum        | protein   | Immunoturbidimetric assay       | yes            | PMID:22251435 |

|      |                   |           |                     |                                |                       |                       |                                              |     |               |
|------|-------------------|-----------|---------------------|--------------------------------|-----------------------|-----------------------|----------------------------------------------|-----|---------------|
| [43] | 35                | IFX       | CDAI                | Short-term                     | serum                 | protein               | ELISA                                        | yes | PMID:22398057 |
| [76] | 26                | ADM       | CDAI, HBI           | <u>Long-term</u><br>Short-term | serum                 | protein               | ELISA                                        | no  | PMID:22784949 |
| [26] | 104               | IFX       | cl.ass.             | Short-term                     | blood                 | DNA                   | multiplex bead-based assay                   | yes | PMID:22860894 |
| [27] | 29                | IFX       | CDAI                | Short-term                     | blood                 | DNA                   | allele-specific PCR, sequencing              | yes | PMID:22960943 |
| [77] | 65                | IFX       | CDAI                | Short-term                     | colon mucosa          | RNA                   | qRT-PCR                                      | no  | PMID:23039249 |
|      |                   |           |                     |                                | serum                 | protein               | ELISA                                        |     |               |
| [78] | 48                | IFX       | CDAI                | Long-term                      | PBMCs                 | DNA                   | SNaPshot, sequencing                         | no  | PMID:23049214 |
| [79] | 102               | IFX       | CDAI                | Short-term                     | PBMCs                 | DNA                   | allele-specific PCR                          | no  | PMID:23358932 |
| [80] | 179               | IFX / ADM | CDAI                | Long-term                      | <u>PBMCs</u><br>serum | <u>DNA</u><br>protein | <u>allele-specific PCR</u><br>ELISA          | no  | PMID:23376290 |
| [31] | 20                | IFX       | CDAI                | Short-term                     | PBMCs                 | RNA                   | microarray                                   | yes | PMID:23809696 |
| [36] | 148               | IFX       | HBI                 | Short-term                     | serum                 | protein               | ELISA                                        | yes | PMID:23932786 |
| [25] | 297               | IFX       | HBI                 | Short-term                     | N.D.                  | DNA                   | allele-specific PCR                          | yes | PMID:24121042 |
| [54] | 43                | IFX / ADM | HBI                 | Short-term                     | serum                 | protein               | TRIFMA, ELISA                                | no  | PMID:24291022 |
| [40] | 25                | ADM       | CDAI                | Short-term                     | colon mucosa          | protein               | IFM                                          | yes | PMID:24562382 |
| [24] | 126               | IFX       | HBI                 | Short-term                     | serum                 | protein               | N.D.                                         | no  | PMID:24707144 |
|      |                   |           |                     |                                | blood                 | DNA                   | allele-specific PCR                          | yes |               |
| [56] | 106               | IFX       | HBI, cl.ass.        | Short-term                     | blood                 | DNA                   | allele-specific PCR                          | no  | PMID:24714240 |
| [49] | 782               | anti-TNF  | simple 3-step scale | Short-term                     | blood                 | DNA                   | allele-specific PCR                          | yes | PMID:24776844 |
| [81] | 32                | anti-TNF  | HBI                 | Short-term                     | serum                 | protein               | ELISA                                        | no  | PMID:25625487 |
| [82] | 19                | IFX       | CDAI                | Short-term                     | serum                 | protein               | CE-LIF                                       | no  | PMID:25639738 |
| [83] | 35                | anti-TNF  | N.D.                | Short-term                     | colon mucosa          | protein               | IHC                                          | no  | PMID:25699367 |
| [7]  | 97                | ADM       | IBDQ                | <u>Long-term</u><br>Short-term | PBMCs                 | DNA                   | PCR-RFLP                                     | yes | PMID:25712183 |
| [38] | 33                | IFX       | HBI                 | Short-term                     | stool                 | protein               | ELISA                                        | yes | PMID:25811118 |
| [84] | 87                | IFX       | HBI                 | Short-term                     | blood                 | DNA                   | PCR-RFLP                                     | no  | PMID:25918954 |
| [46] | 39                | IFX       | CDAI                | Long-term                      | serum                 | protein               | latex agglutination<br>immunoassay,<br>ELISA | yes | PMID:26218144 |
| [85] | 350               | IFX       | HBI                 | Short-term                     | N.D.                  | DNA                   | allele-specific PCR                          | yes | PMID:26339133 |
| [48] | <u>163</u><br>201 | IFX       | cl.ass.             | Short-term                     | <u>N.D.</u><br>serum  | <u>DNA</u><br>protein | <u>immunochip</u><br>N.D.                    | no  | PMID:26351386 |
| [86] | 103               | IFX       | CDAI                | Long-term                      | blood                 | DNA                   | PCR-RFLP                                     | yes | PMID:26558270 |
| [39] | 30                | ADM       | HBI                 | Short-term                     | stool                 | protein               | ELISA                                        | yes | PMID:26595391 |
| [8]  | 79                | ADM       | IBDQ                | <u>Long-term</u><br>Short-term | PBMCs                 | DNA                   | allele-specific PCR                          | yes | PMID:27096233 |

|      |     |                 |                     |            |        |         |                     |     |               |
|------|-----|-----------------|---------------------|------------|--------|---------|---------------------|-----|---------------|
| [9]  | 68  | ADM             | IBDQ                | Long-term  | serum  | protein | N.D.                | no  | PMID:27115882 |
|      |     |                 |                     | Short-term | PBMCs  | DNA     | allele-specific PCR | yes |               |
| [10] | 359 | IFX / ADM / CZP | cl.ass.             | Long-term  | serum  | protein | N.D.                | no  | PMID:27596696 |
|      |     |                 |                     | Short-term | PBMCs  | DNA     | immunochip          | yes |               |
| [87] | 482 | anti-TNF        | simple 3-step scale | Short-term | blood  | DNA     | allele-specific PCR | yes | PMID:28139755 |
| [11] | 314 | IFX / ADM / CZP | cl.ass.             | Short-term | PBMCs  | DNA     | immunochip          | yes | PMID:28590340 |
| [41] | 201 | IFX             | cl.ass.             | Short-term | serum  | protein | ELISA               | yes | PMID:28622097 |
| [47] | 121 | IFX / ADM / CZP | cl.ass.             | Long-term  | blood  | DNA     | allele-specific PCR | yes | PMID:28785150 |
| [88] | 107 | IFX / ADM       | HBI, cl.ass.        | Short-term | blood  | DNA     | PCR-RFLP            | no  | PMID:29152405 |
| [32] | 22  | IFX             | HBI                 | Short-term | PBMCs  | RNA     | microarray          | yes | PMID:29618496 |
| [13] | 19  | IFX / ADM       | CDAI, SES-CD        | Short-term | colon  | RNA     | qRT-PCR             | no  | PMID:29848778 |
|      |     |                 |                     |            | mucosa | protein | IFM                 |     |               |
| [33] | 85  | IFX / ADM       | cl.ass.             | Long-term  | PBMCs  | RNA     | qRT-PCR             | yes | PMID:30007919 |
|      |     |                 |                     |            | serum  | protein | ELISA               |     |               |
| [37] | 35  | IFX             | HBI                 | Short-term | stool  | protein | ELISA               | yes | PMID:30149385 |
|      |     |                 |                     |            | serum  |         | N.D.                |     |               |
| [29] | 121 | IFX             | CDAI                | Long-term  | blood  | DNA     | allele-specific PCR | yes | PMID:30286108 |

**Therapy used:** ADM (adalimumab), anti-TNF (unidentified anti-TNF biological), CZP (certolizumab pegol), IFX (infliximab). **Response definition:** CDAI (Crohn's Disease Activity Index), IBDQ (Inflammatory Bowel Disease Questionnaire), HBI (Harvey-Bradshaw Index), SES-CD (Simple Endoscopic Score for Crohn's Disease), cl.ass. (clinical assessment). **Methods:** PCR-RFLP (PCR-Restriction Fragment Length Polymorphism), PCR-DHPLC (Denaturing High-Performance Liquid Chromatography), qRT-PCR (quantitative real-time PCR), SELDI-TOF (Surface-Enhanced Laser Desorption/Ionization- Time-of-Flight mass spectrometry), ELISA (Enzyme-Linked Immunosorbent Assay), IHC (Immunohistochemistry), IFM (Immunofluorescent Microscopy), TRIFMA (Time-Resolved Immunofluorometric Assay), CE-LIF (Capillary Electrophoresis-Laser-Induced Fluorescence). **N.D.** (not defined).

Supplementary Table S2. SNPs linked to short-term anti-TNF response in CD patients.

| SNP              | p-value               | adjusted p-value      | allele / genotype association | ref. |      | SNP             | p-value               | adjusted p-value      | allele / genotype association | ref.    |
|------------------|-----------------------|-----------------------|-------------------------------|------|------|-----------------|-----------------------|-----------------------|-------------------------------|---------|
| rs704191         | $1.70 \times 10^{-5}$ | $1.52 \times 10^{+0}$ | A                             | NR   | [11] | rs10509115      | $2.20 \times 10^{-2}$ | $7.26 \times 10^{-1}$ | A                             | Re [7]  |
| rs8083571        | $2.40 \times 10^{-5}$ | $4.72 \times 10^{+0}$ | A                             | NR   | [10] | rs11575934      | $2.20 \times 10^{-2}$ | $7.26 \times 10^{-1}$ | AA                            | Re [7]  |
| rs1130864        | $4.09 \times 10^{-5}$ | $4.09 \times 10^{-4}$ | C                             | Re   | [8]  | rs3766606       | $2.20 \times 10^{-2}$ | $4.32 \times 10^{+3}$ | T                             | NR [10] |
| rs7956809        | $4.30 \times 10^{-5}$ | $8.45 \times 10^{+0}$ | G                             | NR   | [10] | rs1050152       | $2.40 \times 10^{-2}$ | $7.92 \times 10^{-1}$ | C                             | Re [7]  |
| rs17200795       | $4.60 \times 10^{-5}$ | $9.04 \times 10^{+0}$ | G                             | NR   | [10] | rs2522057       | $2.40 \times 10^{-2}$ | $4.80 \times 10^{-2}$ | C                             | NR [28] |
| rs10456777       | $6.10 \times 10^{-5}$ | $5.46 \times 10^{+0}$ | C                             | NR   | [11] | rs35260072      | $2.40 \times 10^{-2}$ | $4.80 \times 10^{-2}$ | G                             | NR [28] |
| rs2045307        | $7.40 \times 10^{-5}$ | $1.45 \times 10^{+1}$ | C                             | NR   | [10] | rs2476601       | $2.50 \times 10^{-2}$ | $8.25 \times 10^{-1}$ | A                             | Re [7]  |
| rs10210302       | $8.10 \times 10^{-4}$ | $2.67 \times 10^{-2}$ | CC                            | Re   | [7]  | rs3197999       | $2.50 \times 10^{-2}$ | $4.91 \times 10^{+3}$ | A                             | NR [10] |
| rs9373839        | $1.13 \times 10^{-3}$ | $1.13 \times 10^{-2}$ | C                             | Re   | [8]  | rs2631372       | $2.60 \times 10^{-2}$ | $8.58 \times 10^{-1}$ | CC+CG                         | Re [7]  |
| rs4845604        | $1.90 \times 10^{-3}$ | $3.73 \times 10^{+2}$ | A                             | NR   | [10] | rs4263839       | $2.70 \times 10^{-2}$ | $8.91 \times 10^{-1}$ | AA                            | Re [7]  |
| rs1813443        | $2.00 \times 10^{-3}$ | $6.00 \times 10^{-3}$ | CC                            | NR   | [24] | rs3087243       | $2.80 \times 10^{-2}$ | $9.24 \times 10^{-1}$ | AA                            | Re [7]  |
| rs976881         | $2.00 \times 10^{-3}$ | $2.40 \times 10^{-2}$ | A                             | NR   | [26] | rs2430561       | $3.00 \times 10^{-2}$ | $1.17 \times 10^{+0}$ | TA/AA                         | Re [49] |
| <b>rs396991</b>  | $3.00 \times 10^{-3}$ | $3.00 \times 10^{-3}$ | GG                            | Re   | [23] | rs5030728       | $3.00 \times 10^{-2}$ | $1.17 \times 10^{+0}$ | GA/AA                         | Re [49] |
|                  | $2.10 \times 10^{-2}$ | $6.93 \times 10^{-1}$ | GG                            | Re   | [7]  | <b>rs767455</b> | $3.40 \times 10^{-2}$ | $6.80 \times 10^{-2}$ | G                             | NR [65] |
| rs10512734       | $4.60 \times 10^{-3}$ | $1.52 \times 10^{-1}$ | A                             | Re   | [7]  |                 | $4.00 \times 10^{-2}$ | $2.00 \times 10^{-1}$ | G                             | NR [71] |
| rs1061624        | $5.00 \times 10^{-3}$ | $2.00 \times 10^{-2}$ | A                             | NR   | [25] | rs1800682       | $3.50 \times 10^{-2}$ | $1.16 \times 10^{+0}$ | C                             | Re [7]  |
| rs8049439        | $5.60 \times 10^{-3}$ | $1.85 \times 10^{-1}$ | C                             | Re   | [7]  | rs2070874       | $3.60 \times 10^{-2}$ | $1.19 \times 10^{+0}$ | C                             | Re [7]  |
| rs7927894        | $5.80 \times 10^{-3}$ | $1.91 \times 10^{-1}$ | CC                            | Re   | [7]  | rs2872507       | $3.60 \times 10^{-2}$ | $1.19 \times 10^{+0}$ | A                             | Re [7]  |
| rs1295686        | $6.10 \times 10^{-3}$ | $2.01 \times 10^{-1}$ | AA                            | Re   | [7]  | rs11465996      | $4.00 \times 10^{-2}$ | $1.56 \times 10^{+0}$ | CG/GG                         | Re [49] |
| rs12777960       | $6.70 \times 10^{-3}$ | $2.21 \times 10^{-1}$ | A                             | Re   | [7]  | rs3397          | $4.90 \times 10^{-2}$ | $1.96 \times 10^{-1}$ | CC                            | Re [25] |
| <b>rs1061622</b> | $7.00 \times 10^{-3}$ | $8.40 \times 10^{-2}$ | G                             | Re   | [26] | rs3814057       | $4.00 \times 10^{-2}$ | $1.32 \times 10^{+0}$ | AA+AC                         | Re [7]  |
|                  | $3.60 \times 10^{-2}$ | $3.96 \times 10^{-1}$ | G                             | NR   | [57] | rs4149570       | $4.00 \times 10^{-2}$ | $1.56 \times 10^{+0}$ | TT                            | Re [49] |
| rs1568885        | $7.00 \times 10^{-3}$ | $2.10 \times 10^{-2}$ | TT                            | NR   | [24] | rs2503322       | $4.10 \times 10^{-2}$ | $8.06 \times 10^{+3}$ | A                             | NR [10] |
| <b>rs4645983</b> | $7.20 \times 10^{-3}$ | $2.38 \times 10^{-1}$ | C                             | Re   | [7]  | rs13294         | $4.50 \times 10^{-2}$ | $1.49 \times 10^{+0}$ | AA+A                          | Re [7]  |
|                  | N.D.                  | $3.00 \times 10^{-2}$ | TT                            | Re   | [21] | rs1728785       | $4.50 \times 10^{-2}$ | $8.84 \times 10^{+3}$ | A                             | NR [10] |
| rs2071303        | $8.20 \times 10^{-3}$ | $1.64 \times 10^{-2}$ | G                             | Re   | [9]  | rs6708413       | $4.50 \times 10^{-2}$ | $8.84 \times 10^{+3}$ | G                             | NR [10] |
| rs3804099        | $1.00 \times 10^{-2}$ | $3.90 \times 10^{-1}$ | TC/CC                         | Re   | [49] | rs6887695       | $4.50 \times 10^{-2}$ | $1.49 \times 10^{+0}$ | C                             | Re [7]  |
| rs5744174        | $1.00 \times 10^{-2}$ | $1.83 \times 10^{+0}$ | TC                            | Re   | [87] | rs10761659      | $4.70 \times 10^{-2}$ | $9.24 \times 10^{+3}$ | A                             | NR [10] |
| rs945439         | $1.00 \times 10^{-2}$ | $1.10 \times 10^{-1}$ | G                             | NR   | [57] | rs4246905       | $4.70 \times 10^{-2}$ | $9.24 \times 10^{+3}$ | T                             | NR [10] |
| rs9297145        | $1.10 \times 10^{-2}$ | $9.84 \times 10^{+2}$ | C                             | NR   | [11] | rs2066845       | $4.90 \times 10^{-2}$ | $1.62 \times 10^{+0}$ | C                             | Re [7]  |
| rs3748816        | $1.20 \times 10^{-2}$ | $3.96 \times 10^{-1}$ | C                             | Re   | [7]  | rs921720        | $4.90 \times 10^{-2}$ | $9.63 \times 10^{+3}$ | A                             | NR [10] |
| rs9847710        | $1.30 \times 10^{-2}$ | $2.55 \times 10^{+3}$ | C                             | NR   | [10] | rs1816702       | $5.00 \times 10^{-2}$ | $1.95 \times 10^{+0}$ | CT/TT                         | Re [49] |
| rs1182188        | $1.40 \times 10^{-2}$ | $2.75 \times 10^{+3}$ | C                             | NR   | [10] | rs10495565      | N.D.                  | $1.40 \times 10^{-3}$ | G                             | Re [68] |
| rs3024505        | $1.40 \times 10^{-2}$ | $4.62 \times 10^{-1}$ | C                             | Re   | [7]  | rs1056204       | N.D.                  | $1.40 \times 10^{-3}$ | C                             | Re [68] |
| rs3774934        | $1.40 \times 10^{-2}$ | $1.40 \times 10^{-1}$ | A                             | Re   | [8]  | rs1143634       | N.D.                  | $2.70 \times 10^{-2}$ | C                             | NR [27] |
| rs7517847        | $1.60 \times 10^{-2}$ | $5.28 \times 10^{-1}$ | GG                            | Re   | [7]  | rs12469362      | N.D.                  | $1.30 \times 10^{-3}$ | T                             | Re [68] |
| rs11677200       | $1.70 \times 10^{-2}$ | $2.04 \times 10^{-1}$ | CC                            | Re   | [85] | rs4464248       | N.D.                  | $1.80 \times 10^{-3}$ | G                             | Re [68] |
| rs8126756        | $2.00 \times 10^{-2}$ | $3.66 \times 10^{+0}$ | CC                            | Re   | [87] | rs763110        | N.D.                  | $1.00 \times 10^{-3}$ | CC/CT                         | Re [21] |

NR (allele / genotype frequency higher in nonresponsive patients), Re (allele / genotype frequency higher in responsive patients); N.D. (not defined), ref. (reference); SNPs with more than one independent confirmation are represented in bold; adjusted p-values not originally reported but calculated here are represented in italics

**Supplementary Table S3.** SNPs linked to long-term anti-TNF response in CD patients.

| SNP        | p-value               | adjusted p-value      | allele / genotype association |    | ref. | SNP        | p-value               | adjusted p-value      | allele / genotype association |    | ref. |
|------------|-----------------------|-----------------------|-------------------------------|----|------|------------|-----------------------|-----------------------|-------------------------------|----|------|
| rs9904253  | $9.80 \times 10^{-6}$ | $1.93 \times 10^{+0}$ | A                             | NR | [10] | rs254560   | $2.70 \times 10^{-2}$ | $5.31 \times 10^{+3}$ | A                             | NR | [10] |
| rs1130864  | $4.09 \times 10^{-5}$ | $4.09 \times 10^{-4}$ | C                             | Re | [8]  | rs4645983  | $3.00 \times 10^{-2}$ | $9.90 \times 10^{-1}$ | C                             | Re | [7]  |
| rs55689715 | $6.00 \times 10^{-5}$ | $1.18 \times 10^{+1}$ | C                             | NR | [10] | rs396991   | $3.10 \times 10^{-2}$ | $1.02 \times 10^{+0}$ | GG+GT                         | Re | [7]  |
| rs2682714  | $6.10 \times 10^{-5}$ | $1.20 \times 10^{+1}$ | C                             | NR | [10] | rs1440088  | $3.50 \times 10^{-2}$ | $6.88 \times 10^{+3}$ | G                             | NR | [10] |
| rs7201929  | $8.10 \times 10^{-5}$ | $1.59 \times 10^{+1}$ | C                             | NR | [10] | rs12777960 | $3.70 \times 10^{-2}$ | $1.22 \times 10^{+0}$ | AA+A                          | Re | [7]  |
| rs35725751 | $9.30 \times 10^{-5}$ | $1.83 \times 10^{+1}$ | T                             | NR | [10] | rs9382084  | $3.70 \times 10^{-2}$ | $1.04 \times 10^{+0}$ | GG                            | Re | [86] |
| rs9373839  | $1.13 \times 10^{-3}$ | $1.13 \times 10^{-2}$ | C                             | Re | [8]  | rs2631372  | $3.90 \times 10^{-2}$ | $1.29 \times 10^{+0}$ | C                             | Re | [7]  |
| rs12722515 | $1.90 \times 10^{-3}$ | $3.73 \times 10^{+2}$ | A                             | NR | [10] | rs1883136  | $4.10 \times 10^{-2}$ | $1.15 \times 10^{+0}$ | CC/CA                         | Re | [86] |
| rs763110   | $9.00 \times 10^{-3}$ | $6.30 \times 10^{-2}$ | CC                            | NR | [47] | rs2651244  | $4.10 \times 10^{-2}$ | $8.06 \times 10^{+3}$ | A                             | NR | [10] |
| rs3814057  | $9.60 \times 10^{-3}$ | $3.17 \times 10^{-1}$ | A                             | Re | [7]  | rs2476601  | $4.20 \times 10^{-2}$ | $1.39 \times 10^{+0}$ | AA                            | Re | [7]  |
| rs11229555 | $9.90 \times 10^{-3}$ | $1.95 \times 10^{+3}$ | T                             | NR | [10] | rs9297145  | $4.60 \times 10^{-2}$ | $9.04 \times 10^{+3}$ | C                             | NR | [10] |
| rs3748816  | $1.20 \times 10^{-2}$ | $3.96 \times 10^{-1}$ | C                             | Re | [7]  | rs17119    | $4.70 \times 10^{-2}$ | $9.24 \times 10^{+3}$ | G                             | NR | [10] |
| rs6087990  | $1.30 \times 10^{-2}$ | $2.55 \times 10^{+3}$ | C                             | NR | [10] | rs12994997 | $4.80 \times 10^{-2}$ | $9.43 \times 10^{+3}$ | G                             | NR | [10] |
| rs212388   | $1.40 \times 10^{-2}$ | $2.75 \times 10^{+3}$ | C                             | NR | [10] | rs10210302 | $4.90 \times 10^{-2}$ | $1.62 \times 10^{+0}$ | CC+CT                         | Re | [7]  |
| rs3774934  | $1.40 \times 10^{-2}$ | $1.40 \times 10^{-1}$ | A                             | Re | [8]  | rs1800629  | $4.90 \times 10^{-2}$ | $3.43 \times 10^{-1}$ | AA+G                          | NR | [47] |
| rs1295686  | $1.60 \times 10^{-2}$ | $5.28 \times 10^{-1}$ | AA                            | Re | [7]  | rs194749   | $4.90 \times 10^{-2}$ | $9.63 \times 10^{+3}$ | C                             | NR | [10] |
| rs766748   | $1.90 \times 10^{-2}$ | $5.32 \times 10^{-1}$ | GG                            | Re | [86] | rs1799724  | N.D.                  | $4.00 \times 10^{-2}$ | CC                            | Re | [29] |

NR (allele / genotype frequency higher in nonresponsive patients), Re (allele / genotype frequency higher in responsive patients); N.D. (not defined), ref. (reference); adjusted p-values not originally reported but calculated here are represented in italics

Supplementary Table S4. Colon mucosa RNA markers linked to anti-TNF response in CD patients.

| gene name           | NCBI<br>gene ID | log2 FC<br>NR/Re | p-value                | adjusted p-<br>value   | ref. | gene name        | NCBI<br>gene ID | log2 FC<br>NR/Re | p-value                | adjusted p-<br>value   | ref. |
|---------------------|-----------------|------------------|------------------------|------------------------|------|------------------|-----------------|------------------|------------------------|------------------------|------|
| <i>ACOD1</i>        | 730249          | 1.961            | $1.31 \times 10^{-4}$  | $4.53 \times 10^{-2}$  | [12] | <i>LOC645513</i> | 645513          | -2.192           | $3.86 \times 10^{-5}$  | $3.57 \times 10^{-2}$  | [12] |
| <i>ANGPT2</i>       | 285             | 1.525            | $8.47 \times 10^{-5}$  | $3.94 \times 10^{-2}$  | [12] | <i>LRRC25</i>    | 126364          | 1.827            | $8.37 \times 10^{-5}$  | $3.94 \times 10^{-2}$  | [12] |
| <i>AQP9</i>         | 366             | 2.437            | $1.45 \times 10^{-5}$  | $2.37 \times 10^{-2}$  | [12] | <i>MCEMP1</i>    | 199675          | 1.970            | $2.26 \times 10^{-5}$  | $2.63 \times 10^{-2}$  | [12] |
| <i>BCL2A1</i>       | 597             | 2.080            | $1.03 \times 10^{-4}$  | $4.08 \times 10^{-2}$  | [12] | <i>MGP</i>       | 4256            | 1.633            | $4.38 \times 10^{-5}$  | $3.57 \times 10^{-2}$  | [12] |
| <i>CCL2</i>         | 6347            | 1.876            | $5.68 \times 10^{-5}$  | $3.57 \times 10^{-2}$  | [12] | <i>MMP1</i>      | 4312            | 2.196            | $3.77 \times 10^{-6}$  | $2.37 \times 10^{-2}$  | [12] |
| <i>CLEC7A</i>       | 64581           | 1.539            | $2.11 \times 10^{-5}$  | $2.61 \times 10^{-2}$  | [12] | <i>MMP2</i>      | 4313            | 1.762            | $1.26 \times 10^{-5}$  | $2.37 \times 10^{-2}$  | [12] |
| <i>COL12A1</i>      | 1303            | 2.118            | $1.81 \times 10^{-5}$  | $2.38 \times 10^{-2}$  | [12] | <i>MMP3</i>      | 4314            | 2.230            | $1.24 \times 10^{-4}$  | $4.47 \times 10^{-2}$  | [12] |
| <i>COL15A1</i>      | 1306            | 1.620            | $1.57 \times 10^{-4}$  | $4.83 \times 10^{-2}$  | [12] | <i>MNDA</i>      | 4332            | 2.029            | $1.14 \times 10^{-5}$  | $2.37 \times 10^{-2}$  | [12] |
| <i>COL7A1</i>       | 1294            | 1.623            | $2.43 \times 10^{-5}$  | $2.72 \times 10^{-2}$  | [12] | <i>MUC5AC</i>    | 4586            | 3.043            | $5.40 \times 10^{-5}$  | $3.57 \times 10^{-2}$  | [12] |
| <i>CREB5</i>        | 9586            | 1.976            | $1.33 \times 10^{-4}$  | $4.54 \times 10^{-2}$  | [12] | <i>NCF2</i>      | 4688            | 1.907            | $9.19 \times 10^{-5}$  | $4.06 \times 10^{-2}$  | [12] |
| <i>CSF3</i>         | 1440            | 2.754            | $1.33 \times 10^{-5}$  | $2.37 \times 10^{-2}$  | [12] | <i>NRP1</i>      | 8829            | 1.939            | $4.90 \times 10^{-5}$  | $3.57 \times 10^{-2}$  | [12] |
| <i>CSF3R</i>        | 1441            | 1.910            | $1.15 \times 10^{-4}$  | $4.32 \times 10^{-2}$  | [12] | <i>NRP2</i>      | 8828            | 1.786            | $1.19 \times 10^{-4}$  | $4.37 \times 10^{-2}$  | [12] |
| <i>CSGALNACT1</i>   | 55790           | 1.631            | $5.20 \times 10^{-5}$  | $3.57 \times 10^{-2}$  | [12] | <i>OSM</i>       | 5008            | 2.731            | $3.90 \times 10^{-5}$  | $3.57 \times 10^{-2}$  | [12] |
| <i>CTHRC1</i>       | 115908          | 1.930            | $3.49 \times 10^{-5}$  | $3.57 \times 10^{-2}$  | [12] | <i>PDLIM4</i>    | 8572            | 1.620            | $1.07 \times 10^{-4}$  | $4.11 \times 10^{-2}$  | [12] |
| <i>CXCL6</i>        | 6372            | 2.435            | $1.16 \times 10^{-7}$  | $6.36 \times 10^{-3}$  | [12] | <i>PII5</i>      | 51050           | 2.729            | $2.52 \times 10^{-5}$  | $2.75 \times 10^{-2}$  | [12] |
| <i>CXCR2</i>        | 3579            | 1.814            | $4.69 \times 10^{-5}$  | $3.57 \times 10^{-2}$  | [12] | <i>PLEK</i>      | 5341            | 1.827            | $1.52 \times 10^{-4}$  | $4.82 \times 10^{-2}$  | [12] |
| <i>EGFL6</i>        | 25975           | 1.511            | $4.92 \times 10^{-5}$  | $3.57 \times 10^{-2}$  | [12] | <i>PLTP</i>      | 5360            | 1.660            | $1.78 \times 10^{-5}$  | $2.38 \times 10^{-2}$  | [12] |
| <i>ENG</i>          | 2022            | 1.799            | $2.14 \times 10^{-5}$  | $2.61 \times 10^{-2}$  | [12] | <i>PLXND1</i>    | 23129           | 1.856            | $6.71 \times 10^{-5}$  | $3.63 \times 10^{-2}$  | [12] |
| <i>F5</i>           | 2153            | 1.957            | $1.35 \times 10^{-4}$  | $4.55 \times 10^{-2}$  | [12] | <i>PROK2</i>     | 60675           | 3.189            | $5.79 \times 10^{-6}$  | $2.37 \times 10^{-2}$  | [12] |
| <i>FAM124A</i>      | 220108          | 2.176            | $9.55 \times 10^{-6}$  | $2.37 \times 10^{-2}$  | [12] | <i>PTGS2</i>     | 5743            | 2.206            | $8.55 \times 10^{-5}$  | $3.94 \times 10^{-2}$  | [12] |
| <i>FCGR2A</i>       | 2212            | 1.546            | $1.34 \times 10^{-4}$  | $4.55 \times 10^{-2}$  | [12] |                  |                 | 3.059            | $<1.00 \times 10^{-2}$ | $<5.00 \times 10^{-2}$ | [30] |
| <i>FCGR2C</i>       | 9103            | 1.546            | $1.34 \times 10^{-4}$  | $4.55 \times 10^{-2}$  | [12] | <i>PTX3</i>      | 5806            | 2.141            | $1.40 \times 10^{-5}$  | $2.37 \times 10^{-2}$  | [12] |
| <i>FCGR3A</i>       | 2214            | 2.107            | $1.47 \times 10^{-5}$  | $2.37 \times 10^{-2}$  | [12] | <i>PYY</i>       | 5697            | -1.760           | $5.89 \times 10^{-5}$  | $3.57 \times 10^{-2}$  | [12] |
| <i>FCGR3B</i>       | 2215            | 2.107            | $1.47 \times 10^{-5}$  | $2.37 \times 10^{-2}$  | [12] | <i>RASSF8</i>    | 11228           | 1.713            | $4.87 \times 10^{-5}$  | $3.57 \times 10^{-2}$  | [12] |
| <i>FCN1</i>         | 2219            | 1.632            | $1.54 \times 10^{-5}$  | $2.38 \times 10^{-2}$  | [12] | <i>RGS5</i>      | 8490            | 1.588            | $8.57 \times 10^{-5}$  | $3.94 \times 10^{-2}$  | [12] |
| <i>FGF2</i>         | 2247            | 1.897            | $1.74 \times 10^{-5}$  | $2.38 \times 10^{-2}$  | [12] | <i>S100A12</i>   | 6283            | 2.380            | $3.68 \times 10^{-6}$  | $2.37 \times 10^{-2}$  | [12] |
| <i>FPR1</i>         | 2357            | 2.136            | $4.68 \times 10^{-6}$  | $2.37 \times 10^{-2}$  | [12] | <i>S100A8</i>    | 6279            | 2.491            | $7.67 \times 10^{-6}$  | $2.37 \times 10^{-2}$  | [12] |
| <i>FPR2</i>         | 2358            | 1.711            | $4.43 \times 10^{-5}$  | $3.57 \times 10^{-2}$  | [12] | <i>S100A9</i>    | 6280            | 2.118            | $5.61 \times 10^{-5}$  | $3.57 \times 10^{-2}$  | [12] |
| <i>G0S2</i>         | 50486           | 1.828            | $7.36 \times 10^{-6}$  | $2.37 \times 10^{-2}$  | [12] | <i>SELE</i>      | 6401            | 2.232            | $1.49 \times 10^{-4}$  | $4.80 \times 10^{-2}$  | [12] |
| <i>HGF</i>          | 3082            | 2.362            | $6.90 \times 10^{-6}$  | $2.37 \times 10^{-2}$  | [12] | <i>SELL</i>      | 6402            | 1.700            | $1.30 \times 10^{-4}$  | $4.51 \times 10^{-2}$  | [12] |
| <i>IGFBP5</i>       | 3488            | 1.810            | $2.43 \times 10^{-5}$  | $2.72 \times 10^{-2}$  | [12] | <i>SERPINB2</i>  | 5055            | 2.806            | $8.52 \times 10^{-6}$  | $2.37 \times 10^{-2}$  | [12] |
| <i>IL11</i>         | 3589            | 3.306            | $1.41 \times 10^{-5}$  | $2.37 \times 10^{-2}$  | [12] | <i>SIGLEC5</i>   | 8778            | 1.542            | $1.47 \times 10^{-4}$  | $4.74 \times 10^{-2}$  | [12] |
|                     |                 | 3.184            | $<1.00 \times 10^{-2}$ | $<5.00 \times 10^{-2}$ | [30] | <i>SLC2A3</i>    | 6515            | 1.561            | $1.54 \times 10^{-4}$  | $4.83 \times 10^{-2}$  | [12] |
| <i>IL13RA2</i>      | 3598            | 2.761            | $1.27 \times 10^{-5}$  | $2.37 \times 10^{-2}$  | [12] | <i>STC1</i>      | 6781            | 1.514            | $7.49 \times 10^{-5}$  | $3.89 \times 10^{-2}$  | [12] |
|                     |                 | 2.184            | $<1.00 \times 10^{-2}$ | $<5.00 \times 10^{-2}$ | [30] |                  |                 | 2.396            | $<1.00 \times 10^{-2}$ | $<5.00 \times 10^{-2}$ | [30] |
| <i>IL1RN</i>        | 3557            | 2.044            | $1.80 \times 10^{-5}$  | $2.38 \times 10^{-2}$  | [12] | <i>TFAP2A</i>    | 7020            | 1.991            | $4.28 \times 10^{-5}$  | $3.57 \times 10^{-2}$  | [12] |
| <i>KCNJ15</i>       | 3772            | 1.855            | $8.31 \times 10^{-5}$  | $3.94 \times 10^{-2}$  | [12] | <i>TFPI2</i>     | 7980            | 2.697            | $1.05 \times 10^{-4}$  | $4.11 \times 10^{-2}$  | [12] |
| <i>LILRA1</i>       | 11024           | 1.584            | $7.23 \times 10^{-5}$  | $3.80 \times 10^{-2}$  | [12] | <i>TMEM71</i>    | 137835          | 1.713            | $5.90 \times 10^{-5}$  | $3.57 \times 10^{-2}$  | [12] |
| <i>LILRA2</i>       | 11027           | 1.850            | $1.40 \times 10^{-5}$  | $2.37 \times 10^{-2}$  | [12] | <i>TNC</i>       | 3371            | 1.912            | $2.74 \times 10^{-5}$  | $2.94 \times 10^{-2}$  | [12] |
| <i>LILRA6</i>       | 79168           | 1.636            | $2.20 \times 10^{-5}$  | $2.61 \times 10^{-2}$  | [12] | <i>TNFAIP6</i>   | 7130            | 2.423            | $4.64 \times 10^{-5}$  | $3.57 \times 10^{-2}$  | [12] |
| <i>LILRB2</i>       | 10288           | 1.636            | $2.20 \times 10^{-5}$  | $2.61 \times 10^{-2}$  | [12] | <i>TNFRSF11B</i> | 4982            | 1.737            | $<1.00 \times 10^{-2}$ | $<5.00 \times 10^{-2}$ | [30] |
| <i>LILRB3</i>       | 11025           | 1.636            | $2.20 \times 10^{-5}$  | $2.61 \times 10^{-2}$  | [12] | <i>TREM1</i>     | 54210           | 2.881            | $4.81 \times 10^{-5}$  | $3.57 \times 10^{-2}$  | [12] |
| <i>LOC102725015</i> | 102725015       | 1.636            | $2.20 \times 10^{-5}$  | $2.61 \times 10^{-2}$  | [12] | <i>TRPM6</i>     | 140803          | -1.587           | $8.30 \times 10^{-5}$  | $3.94 \times 10^{-2}$  | [12] |
| <i>LOC102725029</i> | 102725029       | 1.636            | $2.20 \times 10^{-5}$  | $2.61 \times 10^{-2}$  | [12] | <i>VCAN</i>      | 1462            | 1.615            | $9.99 \times 10^{-5}$  | $4.06 \times 10^{-2}$  | [12] |
| <i>LOC102725031</i> | 102725031       | 1.636            | $2.20 \times 10^{-5}$  | $2.61 \times 10^{-2}$  | [12] | <i>VMO1</i>      | 284013          | 2.345            | $8.10 \times 10^{-6}$  | $2.37 \times 10^{-2}$  | [12] |
| <i>LOC102725034</i> | 102725034       | 1.636            | $2.20 \times 10^{-5}$  | $2.61 \times 10^{-2}$  | [12] | <i>VNN2</i>      | 8875            | 2.126            | $5.61 \times 10^{-5}$  | $3.57 \times 10^{-2}$  | [12] |
| <i>LOC102725035</i> | 102725035       | 1.636            | $2.20 \times 10^{-5}$  | $2.61 \times 10^{-2}$  | [12] |                  |                 |                  |                        |                        |      |

RNA markers with more than one confirmation are represented in bold; adjusted p-values not originally reported but calculated here are represented in italics

**Supplementary Table S5.** Integrated colon markers linked to short-term anti-TNF response in CD patients.

| gene name         | NCBI<br>gene ID | SNP        | p-value               | adjusted p-<br>value  | data<br>type | reference |
|-------------------|-----------------|------------|-----------------------|-----------------------|--------------|-----------|
| <b>AC034220.3</b> | N.A.            | rs2522057  | $2.40 \times 10^{-2}$ | $4.80 \times 10^{-2}$ | DNA          | [28]      |
|                   |                 | rs35260072 | $2.40 \times 10^{-2}$ | $4.80 \times 10^{-2}$ |              |           |
|                   |                 | rs1050152  | $2.40 \times 10^{-2}$ | $7.92 \times 10^{-1}$ |              | [7]       |
|                   |                 | rs2631372  | $2.60 \times 10^{-2}$ | $8.58 \times 10^{-1}$ |              |           |
| <i>ACOD1</i>      | 730249          | N.A.       | $1.31 \times 10^{-4}$ | $4.53 \times 10^{-2}$ | RNA          | [12]      |
| <b>ACSL6</b>      | 23305           | rs2522057  | $2.40 \times 10^{-2}$ | $4.80 \times 10^{-2}$ | DNA          | [28]      |
|                   |                 | rs35260072 | $2.40 \times 10^{-2}$ | $4.80 \times 10^{-2}$ |              |           |
|                   |                 | rs1050152  | $2.40 \times 10^{-2}$ | $7.92 \times 10^{-1}$ |              | [7]       |
| <i>AMT</i>        | 275             | rs3197999  | $2.50 \times 10^{-2}$ | $4.91 \times 10^{-3}$ | DNA          | [10]      |
| <i>ANGPT2</i>     | 285             | N.A.       | $8.47 \times 10^{-5}$ | $3.94 \times 10^{-2}$ | RNA          | [12]      |
| <i>AQP9</i>       | 366             | N.A.       | $1.45 \times 10^{-5}$ | $2.37 \times 10^{-2}$ | RNA          | [12]      |
| <i>BCL2A1</i>     | 597             | N.A.       | $1.03 \times 10^{-4}$ | $4.08 \times 10^{-2}$ | RNA          | [12]      |
| <b>CASP9</b>      | 842             | rs4645983  | N.D.                  | $3.00 \times 10^{-2}$ | DNA          | [21]      |
|                   |                 |            | $7.20 \times 10^{-3}$ | $2.38 \times 10^{-1}$ |              | [7]       |
| <i>CCL2</i>       | 6347            | N.A.       | $5.68 \times 10^{-5}$ | $3.57 \times 10^{-2}$ | RNA          | [12]      |
| <i>CDC37P1</i>    | 390688          | rs8049439  | $5.60 \times 10^{-3}$ | $1.85 \times 10^{-1}$ | DNA          | [7]       |
| <i>CLEC7A</i>     | 64581           | N.A.       | $2.11 \times 10^{-5}$ | $2.61 \times 10^{-2}$ | RNA          | [12]      |
| <i>COL12A1</i>    | 1303            | N.A.       | $1.81 \times 10^{-5}$ | $2.38 \times 10^{-2}$ | RNA          | [12]      |
| <i>COL15A1</i>    | 1306            | N.A.       | $1.57 \times 10^{-4}$ | $4.83 \times 10^{-2}$ | RNA          | [12]      |
| <i>COL7A1</i>     | 1294            | N.A.       | $2.43 \times 10^{-5}$ | $2.72 \times 10^{-2}$ | RNA          | [12]      |
| <i>CREB5</i>      | 9586            | N.A.       | $1.33 \times 10^{-4}$ | $4.54 \times 10^{-2}$ | RNA          | [12]      |
| <i>CSF3</i>       | 1440            | N.A.       | $1.33 \times 10^{-5}$ | $2.37 \times 10^{-2}$ | RNA          | [12]      |
| <i>CSF3R</i>      | 1441            | N.A.       | $1.15 \times 10^{-4}$ | $4.32 \times 10^{-2}$ | RNA          | [12]      |
| <i>CSGALNACT1</i> | 55790           | N.A.       | $5.20 \times 10^{-5}$ | $3.57 \times 10^{-2}$ | RNA          | [12]      |
| <i>CTHRC1</i>     | 115908          | N.A.       | $3.49 \times 10^{-5}$ | $3.57 \times 10^{-2}$ | RNA          | [12]      |
| <i>CXCL6</i>      | 6372            | N.A.       | $1.16 \times 10^{-7}$ | $6.36 \times 10^{-3}$ | RNA          | [12]      |
| <i>CXCR2</i>      | 3579            | N.A.       | $4.69 \times 10^{-5}$ | $3.57 \times 10^{-2}$ | RNA          | [12]      |
| <i>EGFL6</i>      | 25975           | N.A.       | $4.92 \times 10^{-5}$ | $3.57 \times 10^{-2}$ | RNA          | [12]      |
| <i>ENG</i>        | 2022            | N.A.       | $2.14 \times 10^{-5}$ | $2.61 \times 10^{-2}$ | RNA          | [12]      |
| <i>F5</i>         | 2153            | N.A.       | $1.35 \times 10^{-4}$ | $4.55 \times 10^{-2}$ | RNA          | [12]      |
| <i>FAM124A</i>    | 220108          | N.A.       | $9.55 \times 10^{-6}$ | $2.37 \times 10^{-2}$ | RNA          | [12]      |
| <i>FAS</i>        | 355             | rs1800682  | $3.50 \times 10^{-2}$ | $1.16 \times 10^{-0}$ | DNA          | [7]       |
| <i>FCGR2A</i>     | 2212            | N.A.       | $1.34 \times 10^{-4}$ | $4.55 \times 10^{-2}$ | RNA          | [12]      |
| <b>FCGR2C</b>     | 9103            | rs396991   | $3.00 \times 10^{-3}$ | $3.00 \times 10^{-3}$ | DNA          | [23]      |
|                   |                 | N.A.       | $1.34 \times 10^{-4}$ | $4.55 \times 10^{-2}$ | RNA          | [12]      |
|                   |                 | rs396991   | $2.10 \times 10^{-2}$ | $6.93 \times 10^{-1}$ | DNA          | [7]       |
| <i>FCGR3A</i>     | 2214            | N.A.       | $1.47 \times 10^{-5}$ | $2.37 \times 10^{-2}$ | RNA          | [12]      |
| <i>FCGR3B</i>     | 2215            | N.A.       | $1.47 \times 10^{-5}$ | $2.37 \times 10^{-2}$ | RNA          | [12]      |
| <i>FCN1</i>       | 2219            | N.A.       | $1.54 \times 10^{-5}$ | $2.38 \times 10^{-2}$ | RNA          | [12]      |
| <i>FGF2</i>       | 2247            | N.A.       | $1.74 \times 10^{-5}$ | $2.38 \times 10^{-2}$ | RNA          | [12]      |
| <i>FPR1</i>       | 2357            | N.A.       | $4.68 \times 10^{-6}$ | $2.37 \times 10^{-2}$ | RNA          | [12]      |
| <i>FPR2</i>       | 2358            | N.A.       | $4.43 \times 10^{-5}$ | $3.57 \times 10^{-2}$ | RNA          | [12]      |
| <i>G0S2</i>       | 50486           | N.A.       | $7.36 \times 10^{-6}$ | $2.37 \times 10^{-2}$ | RNA          | [12]      |
| <i>GNA12</i>      | 2768            | rs1182188  | $1.40 \times 10^{-2}$ | $2.75 \times 10^{-3}$ | DNA          | [10]      |
| <i>GSDMA</i>      | 284110          | rs2872507  | $3.60 \times 10^{-2}$ | $1.19 \times 10^{-0}$ | DNA          | [7]       |

|                     |           |            |                        |                        |     |      |
|---------------------|-----------|------------|------------------------|------------------------|-----|------|
| <i>GSDMB</i>        | 55876     | rs2872507  | $3.60 \times 10^{-2}$  | $1.19 \times 10^{+0}$  | DNA | [7]  |
| <i>HFE</i>          | 3077      | rs2071303  | $8.20 \times 10^{-3}$  | $1.64 \times 10^{-2}$  | DNA | [9]  |
| <i>HGF</i>          | 3082      | N.A.       | $6.90 \times 10^{-6}$  | $2.37 \times 10^{-2}$  | RNA | [12] |
| <i>HSPA7</i>        | 3311      | rs396991   | $3.00 \times 10^{-3}$  | $3.00 \times 10^{-3}$  | DNA | [23] |
|                     |           |            | $2.10 \times 10^{-2}$  | $6.93 \times 10^{-1}$  |     | [7]  |
| <i>IGFBP5</i>       | 3488      | N.A.       | $2.43 \times 10^{-5}$  | $2.72 \times 10^{-2}$  | RNA | [12] |
| <i>IL11</i>         | 3589      | N.A.       | $1.41 \times 10^{-5}$  | $2.37 \times 10^{-2}$  | RNA | [12] |
|                     |           |            | $<1.00 \times 10^{-2}$ | $<5.00 \times 10^{-2}$ |     | [30] |
| <i>IL12RB1</i>      | 3594      | rs11575934 | $2.20 \times 10^{-2}$  | $7.26 \times 10^{-1}$  | DNA | [7]  |
| <i>IL13RA2</i>      | 3598      | N.A.       | $1.27 \times 10^{-5}$  | $2.37 \times 10^{-2}$  | RNA | [12] |
|                     |           |            | $<1.00 \times 10^{-2}$ | $<5.00 \times 10^{-2}$ |     | [30] |
| <i>IL1RN</i>        | 3557      | N.A.       | $1.80 \times 10^{-5}$  | $2.38 \times 10^{-2}$  | RNA | [12] |
| <i>ITIH4</i>        | 3700      | rs9847710  | $1.30 \times 10^{-2}$  | $2.55 \times 10^{+3}$  | DNA | [10] |
| <i>KCNJ15</i>       | 3772      | N.A.       | $8.31 \times 10^{-5}$  | $3.94 \times 10^{-2}$  | RNA | [12] |
| <i>KIF3A</i>        | 11127     | rs2070874  | $3.60 \times 10^{-2}$  | $1.19 \times 10^{+0}$  | DNA | [7]  |
| <i>LILRA1</i>       | 11024     | N.A.       | $7.23 \times 10^{-5}$  | $3.80 \times 10^{-2}$  | RNA | [12] |
| <i>LILRA2</i>       | 11027     | N.A.       | $1.40 \times 10^{-5}$  | $2.37 \times 10^{-2}$  | RNA | [12] |
| <i>LILRA6</i>       | 79168     | N.A.       | $2.20 \times 10^{-5}$  | $2.61 \times 10^{-2}$  | RNA | [12] |
| <i>LILRB2</i>       | 10288     | N.A.       | $2.20 \times 10^{-5}$  | $2.61 \times 10^{-2}$  | RNA | [12] |
| <i>LILRB3</i>       | 11025     | N.A.       | $2.20 \times 10^{-5}$  | $2.61 \times 10^{-2}$  | RNA | [12] |
| <i>LOC102725015</i> | 102725015 | N.A.       | $2.20 \times 10^{-5}$  | $2.61 \times 10^{-2}$  | RNA | [12] |
| <i>LOC102725029</i> | 102725029 | N.A.       | $2.20 \times 10^{-5}$  | $2.61 \times 10^{-2}$  | RNA | [12] |
| <i>LOC102725031</i> | 102725031 | N.A.       | $2.20 \times 10^{-5}$  | $2.61 \times 10^{-2}$  | RNA | [12] |
| <i>LOC102725034</i> | 102725034 | N.A.       | $2.20 \times 10^{-5}$  | $2.61 \times 10^{-2}$  | RNA | [12] |
| <i>LOC102725035</i> | 102725035 | N.A.       | $2.20 \times 10^{-5}$  | $2.61 \times 10^{-2}$  | RNA | [12] |
| <i>LOC645513</i>    | 645513    | N.A.       | $3.86 \times 10^{-5}$  | $3.57 \times 10^{-2}$  | RNA | [12] |
| <i>LRRC25</i>       | 126364    | N.A.       | $8.37 \times 10^{-5}$  | $3.94 \times 10^{-2}$  | RNA | [12] |
| <i>MCEMP1</i>       | 199675    | N.A.       | $2.26 \times 10^{-5}$  | $2.63 \times 10^{-2}$  | RNA | [12] |
| <i>MGP</i>          | 4256      | N.A.       | $4.38 \times 10^{-5}$  | $3.57 \times 10^{-2}$  | RNA | [12] |
| <i>MMEL1</i>        | 79258     | rs3748816  | $1.20 \times 10^{-2}$  | $3.96 \times 10^{-1}$  | DNA | [7]  |
| <i>MMP1</i>         | 4312      | N.A.       | $3.77 \times 10^{-6}$  | $2.37 \times 10^{-2}$  | RNA | [12] |
| <i>MMP2</i>         | 4313      | N.A.       | $1.26 \times 10^{-5}$  | $2.37 \times 10^{-2}$  | RNA | [12] |
| <i>MMP3</i>         | 4314      | N.A.       | $1.24 \times 10^{-4}$  | $4.47 \times 10^{-2}$  | RNA | [12] |
| <i>MNDA</i>         | 4332      | N.A.       | $1.14 \times 10^{-5}$  | $2.37 \times 10^{-2}$  | RNA | [12] |
| <i>MUC5AC</i>       | 4586      | N.A.       | $5.40 \times 10^{-5}$  | $3.57 \times 10^{-2}$  | RNA | [12] |
| <i>NCF2</i>         | 4688      | N.A.       | $9.19 \times 10^{-5}$  | $4.06 \times 10^{-2}$  | RNA | [12] |
| <i>NPIP7</i>        | 440350    | rs8049439  | $5.60 \times 10^{-3}$  | $1.85 \times 10^{-1}$  | DNA | [7]  |
| <i>NRP1</i>         | 8829      | N.A.       | $4.90 \times 10^{-5}$  | $3.57 \times 10^{-2}$  | RNA | [12] |
| <i>NRP2</i>         | 8828      | N.A.       | $1.19 \times 10^{-4}$  | $4.37 \times 10^{-2}$  | RNA | [12] |
| <i>OSM</i>          | 5008      | N.A.       | $3.90 \times 10^{-5}$  | $3.57 \times 10^{-2}$  | RNA | [12] |
| <i>PARK7</i>        | 11315     | rs3766606  | $2.20 \times 10^{-2}$  | $4.32 \times 10^{+3}$  | DNA | [10] |
| <i>PDLIM4</i>       | 8572      | N.A.       | $1.07 \times 10^{-4}$  | $4.11 \times 10^{-2}$  | RNA | [12] |
| <i>PGAP3</i>        | 93210     | rs2872507  | $3.60 \times 10^{-2}$  | $1.19 \times 10^{+0}$  | DNA | [7]  |
| <i>PI15</i>         | 51050     | N.A.       | $2.52 \times 10^{-5}$  | $2.75 \times 10^{-2}$  | RNA | [12] |
| <i>PLEK</i>         | 5341      | N.A.       | $1.52 \times 10^{-4}$  | $4.82 \times 10^{-2}$  | RNA | [12] |
| <i>PLTP</i>         | 5360      | N.A.       | $1.78 \times 10^{-5}$  | $2.38 \times 10^{-2}$  | RNA | [12] |
| <i>PLXND1</i>       | 23129     | N.A.       | $6.71 \times 10^{-5}$  | $3.63 \times 10^{-2}$  | RNA | [12] |
| <i>PROK2</i>        | 60675     | N.A.       | $5.79 \times 10^{-6}$  | $2.37 \times 10^{-2}$  | RNA | [12] |
| <i>PTGS2</i>        | 5743      | N.A.       | $8.55 \times 10^{-5}$  | $3.94 \times 10^{-2}$  | RNA | [12] |
|                     |           |            | $<1.00 \times 10^{-2}$ | $<5.00 \times 10^{-2}$ |     | [30] |



|                       |        |            |                        |                        |         |      |
|-----------------------|--------|------------|------------------------|------------------------|---------|------|
| <i>PTX3</i>           | 5806   | N.A.       | $1.40 \times 10^{-5}$  | $2.37 \times 10^{-2}$  | RNA     | [12] |
| <i>PYY</i>            | 5697   | N.A.       | $5.89 \times 10^{-5}$  | $3.57 \times 10^{-2}$  | RNA     | [12] |
| <i>RASSF8</i>         | 11228  | N.A.       | $4.87 \times 10^{-5}$  | $3.57 \times 10^{-2}$  | RNA     | [12] |
| <i>RBM6</i>           | 10180  | rs3197999  | $2.50 \times 10^{-2}$  | $4.91 \times 10^{-3}$  | DNA     | [10] |
| <i>RFT1</i>           | 91869  | rs9847710  | $1.30 \times 10^{-2}$  | $2.55 \times 10^{-3}$  | DNA     | [10] |
| <i>RGS5</i>           | 8490   | N.A.       | $8.57 \times 10^{-5}$  | $3.94 \times 10^{-2}$  | RNA     | [12] |
| <i>RNF123</i>         | 63891  | rs3197999  | $2.50 \times 10^{-2}$  | $4.91 \times 10^{-3}$  | DNA     | [10] |
| RP11-1348G14.4        | N.A.   | rs8049439  | $5.60 \times 10^{-3}$  | $1.85 \times 10^{-1}$  | DNA     | [7]  |
| <i>S100A12</i>        | 6283   | N.A.       | $3.68 \times 10^{-6}$  | $2.37 \times 10^{-2}$  | RNA     | [12] |
|                       |        |            | $7.67 \times 10^{-6}$  | $2.37 \times 10^{-2}$  | RNA     | [12] |
| <b><i>S100A8</i></b>  | 6279   | N.A.       | $<5.00 \times 10^{-3}$ | N.D.                   |         | [38] |
|                       |        |            | $<5.00 \times 10^{-3}$ | N.D.                   | protein | [39] |
|                       |        |            | $3.00 \times 10^{-2}$  | N.D.                   |         | [37] |
| <b><i>S100A9</i></b>  | 6280   | N.A.       | $5.61 \times 10^{-5}$  | $3.57 \times 10^{-2}$  | RNA     | [12] |
|                       |        |            | $<5.00 \times 10^{-3}$ | N.D.                   |         | [38] |
|                       |        |            | $<5.00 \times 10^{-3}$ | N.D.                   | protein | [39] |
|                       |        |            | $3.00 \times 10^{-2}$  | N.D.                   |         | [37] |
| <i>SELE</i>           | 6401   | N.A.       | $1.49 \times 10^{-4}$  | $4.80 \times 10^{-2}$  | RNA     | [12] |
| <i>SELL</i>           | 6402   | N.A.       | $1.30 \times 10^{-4}$  | $4.51 \times 10^{-2}$  | RNA     | [12] |
| <i>SERPINB2</i>       | 5055   | N.A.       | $8.52 \times 10^{-6}$  | $2.37 \times 10^{-2}$  | RNA     | [12] |
| <i>SFMBT1</i>         | 51460  | rs9847710  | $1.30 \times 10^{-2}$  | $2.55 \times 10^{-3}$  | DNA     | [10] |
| <i>SIGLEC5</i>        | 8778   | N.A.       | $1.47 \times 10^{-4}$  | $4.74 \times 10^{-2}$  | RNA     | [12] |
| <b><i>SLC22A4</i></b> | 6583   | rs35260072 | $2.40 \times 10^{-2}$  | $4.80 \times 10^{-2}$  | DNA     | [28] |
|                       |        | rs1050152  | $2.40 \times 10^{-2}$  | $7.92 \times 10^{-1}$  |         | [7]  |
| <b><i>SLC22A5</i></b> | 6584   | rs35260072 | $2.40 \times 10^{-2}$  | $4.80 \times 10^{-2}$  |         | [28] |
|                       |        | rs1050152  | $2.40 \times 10^{-2}$  | $7.92 \times 10^{-1}$  | DNA     | [7]  |
|                       |        | rs2631372  | $2.60 \times 10^{-2}$  | $8.58 \times 10^{-1}$  |         |      |
| <i>SLC2A3</i>         | 6515   | N.A.       | $1.54 \times 10^{-4}$  | $4.83 \times 10^{-2}$  | RNA     | [12] |
| <i>STC1</i>           | 6781   | N.A.       | $7.49 \times 10^{-5}$  | $3.89 \times 10^{-2}$  | RNA     | [12] |
|                       |        |            | $<1.00 \times 10^{-2}$ | $<5.00 \times 10^{-2}$ |         | [30] |
| <i>SULT1A1</i>        | 6817   | rs8049439  | $5.60 \times 10^{-3}$  | $1.85 \times 10^{-1}$  | DNA     | [7]  |
| <i>TARS2</i>          | 80222  | rs13294    | $4.50 \times 10^{-2}$  | $1.49 \times 10^{-0}$  | DNA     | [7]  |
| <i>TFAP2A</i>         | 7020   | N.A.       | $4.28 \times 10^{-5}$  | $3.57 \times 10^{-2}$  | RNA     | [12] |
| <i>TFPI2</i>          | 7980   | N.A.       | $1.05 \times 10^{-4}$  | $4.11 \times 10^{-2}$  | RNA     | [12] |
| <i>TMEM71</i>         | 137835 | N.A.       | $5.90 \times 10^{-5}$  | $3.57 \times 10^{-2}$  | RNA     | [12] |
| <i>TNC</i>            | 3371   | N.A.       | $2.74 \times 10^{-5}$  | $2.94 \times 10^{-2}$  | RNA     | [12] |
| <i>TNF</i>            | 7124   | N.A.       | $4.00 \times 10^{-4}$  | N.D.                   | protein | [40] |
| <i>TNFAIP6</i>        | 7130   | N.A.       | $4.64 \times 10^{-5}$  | $3.57 \times 10^{-2}$  | RNA     | [12] |
| <i>TNFRSF11B</i>      | 4982   | N.A.       | $<1.00 \times 10^{-2}$ | $<5.00 \times 10^{-2}$ | RNA     | [30] |
| <i>TREM1</i>          | 54210  | N.A.       | $4.81 \times 10^{-5}$  | $3.57 \times 10^{-2}$  | RNA     | [12] |
| <i>TRPM6</i>          | 140803 | N.A.       | $8.30 \times 10^{-5}$  | $3.94 \times 10^{-2}$  | RNA     | [12] |
| <i>TUFM</i>           | 7284   | rs8049439  | $5.60 \times 10^{-3}$  | $1.85 \times 10^{-1}$  | DNA     | [7]  |
| <i>UBA7</i>           | 7318   | rs3197999  | $2.50 \times 10^{-2}$  | $4.91 \times 10^{-3}$  | DNA     | [10] |
| <i>VCAN</i>           | 1462   | N.A.       | $9.99 \times 10^{-5}$  | $4.06 \times 10^{-2}$  | RNA     | [12] |
| <i>VMO1</i>           | 284013 | N.A.       | $8.10 \times 10^{-6}$  | $2.37 \times 10^{-2}$  | RNA     | [12] |
| <i>VNN2</i>           | 8875   | N.A.       | $5.61 \times 10^{-5}$  | $3.57 \times 10^{-2}$  | RNA     | [12] |

Markers with more than one confirmation are represented in bold; adjusted p-values not originally reported but calculated here are represented in italics; N.D. (not defined); N.A. (not applicable)

**Supplementary Table S6.** Integrated colon markers linked to long-term anti-TNF response in CD patients.

| gene name     | NCBI gene ID | SNP        | p-value               | adjusted p-value      | data type | reference |
|---------------|--------------|------------|-----------------------|-----------------------|-----------|-----------|
| AC034220.3    | N.A.         | rs2631372  | $3.90 \times 10^{-2}$ | $1.29 \times 10^{+0}$ | DNA       | [7]       |
| ATP6V1G2      | 534          | rs1799724  | $2.50 \times 10^{-3}$ | $4.00 \times 10^{-2}$ | DNA       | [29]      |
| C4A           | 720          | rs1800629  | $4.90 \times 10^{-2}$ | $3.43 \times 10^{-1}$ | DNA       | [47]      |
| CASP9         | 842          | rs4645983  | $3.00 \times 10^{-2}$ | $9.90 \times 10^{-1}$ | DNA       | [7]       |
| <b>CCHCR1</b> | 54535        | rs1800629  | $4.90 \times 10^{-2}$ | $3.43 \times 10^{-1}$ | DNA       | [47]      |
|               |              | rs1799724  | $2.50 \times 10^{-3}$ | $4.00 \times 10^{-2}$ |           | [29]      |
| CDC37P1       | 390688       | rs7201929  | $8.10 \times 10^{-5}$ | $1.59 \times 10^{+1}$ | DNA       | [10]      |
|               |              | rs35725751 | $9.30 \times 10^{-5}$ | $1.83 \times 10^{+1}$ |           |           |
| COMMD7        | 149951       | rs6087990  | $1.30 \times 10^{-2}$ | $2.55 \times 10^{+3}$ | DNA       | [10]      |
| CYP21A1P      | 1590         | rs1800629  | $4.90 \times 10^{-2}$ | $3.43 \times 10^{-1}$ | DNA       | [47]      |
| DNMT3B        | 1789         | rs6087990  | $1.30 \times 10^{-2}$ | $2.55 \times 10^{+3}$ | DNA       | [10]      |
| FCGR2C        | 9103         | rs396991   | $3.10 \times 10^{-2}$ | $1.02 \times 10^{+0}$ | DNA       | [7]       |
| HLA-C         | 3107         | rs1800629  | $4.90 \times 10^{-2}$ | $3.43 \times 10^{-1}$ | DNA       | [47]      |
| HSPA7         | 3311         | rs396991   | $3.10 \times 10^{-2}$ | $1.02 \times 10^{+0}$ | DNA       | [7]       |
| MICA          | 100507436    | rs1799724  | $2.50 \times 10^{-3}$ | $4.00 \times 10^{-2}$ | DNA       | [29]      |
| MMEL1         | 79258        | rs3748816  | $1.20 \times 10^{-2}$ | $3.96 \times 10^{-1}$ | DNA       | [7]       |
| PSORS1C1      | 170679       | rs1800629  | $4.90 \times 10^{-2}$ | $3.43 \times 10^{-1}$ | DNA       | [47]      |
| SLC22A5       | 6584         | rs2631372  | $3.90 \times 10^{-2}$ | $1.29 \times 10^{+0}$ | DNA       | [7]       |
| TRAF3IP2-AS1  | 643749       | rs1883136  | $4.10 \times 10^{-2}$ | $1.15 \times 10^{+0}$ | DNA       | [86]      |
| TUFM          | 7284         | rs7201929  | $8.10 \times 10^{-5}$ | $1.59 \times 10^{+1}$ | DNA       | [10]      |
|               |              | rs35725751 | $9.30 \times 10^{-5}$ | $1.83 \times 10^{+1}$ |           |           |

Markers with more than one confirmation are represented in bold; adjusted p-values not originally reported but calculated here are represented in italics; N.A. (not applicable)

**Supplementary Table S7.** Integrated blood markers linked to short-term anti-TNF response in CD patients.

| gene name  | NCBI<br>gene ID | SNP        | p-value                | adjusted p-<br>value  | data<br>type | reference |
|------------|-----------------|------------|------------------------|-----------------------|--------------|-----------|
| AC007278.2 | N.A.            | rs6708413  | $4.50 \times 10^{-2}$  | $8.84 \times 10^{-3}$ | DNA          | [10]      |
| AC007278.3 | N.A.            | rs6708413  | $4.50 \times 10^{-2}$  | $8.84 \times 10^{-3}$ | DNA          | [10]      |
| AC034220.3 | N.A.            | rs2631372  | $2.60 \times 10^{-2}$  | $8.58 \times 10^{-1}$ | DNA          | [7]       |
| AC116366.6 | N.A.            | rs2522057  | $2.40 \times 10^{-2}$  | $4.80 \times 10^{-2}$ | DNA          | [28]      |
|            |                 | rs35260072 | $2.40 \times 10^{-2}$  | $4.80 \times 10^{-2}$ |              |           |
|            |                 | rs1050152  | $2.40 \times 10^{-2}$  | $7.92 \times 10^{-1}$ |              | [7]       |
|            |                 | rs2631372  | $2.60 \times 10^{-2}$  | $8.58 \times 10^{-1}$ |              |           |
| ACTA2      | 59              | rs1800682  | $3.50 \times 10^{-2}$  | $1.16 \times 10^{+0}$ | DNA          | [7]       |
| CREM       | 1390            | rs12777960 | $6.70 \times 10^{-3}$  | $2.21 \times 10^{-1}$ | DNA          | [7]       |
| CRP        | 1401            | N.A.       | $2.00 \times 10^{-2}$  | N.D.                  | protein      | [34]      |
|            |                 |            | $7.00 \times 10^{-4}$  | N.D.                  |              | [35]      |
|            |                 |            | $1.50 \times 10^{-2}$  | N.D.                  |              | [36]      |
|            |                 |            | $4.00 \times 10^{-2}$  | N.D.                  |              | [37]      |
| CXCL8      | 3576            | N.A.       | $1.00 \times 10^{-2}$  | N.D.                  |              | [41]      |
| DEFA1      | 1667            | N.A.       | $6.72 \times 10^{-3}$  | $9.13 \times 10^{-1}$ | RNA          | [32]      |
| DEFA1B     | 728358          | N.A.       | $6.84 \times 10^{-3}$  | $9.13 \times 10^{-1}$ | RNA          | [32]      |
| DEFA3      | 1668            | N.A.       | $6.72 \times 10^{-3}$  | $9.13 \times 10^{-1}$ | RNA          | [32]      |
| FAS        | 355             | rs1800682  | $3.50 \times 10^{-2}$  | $1.16 \times 10^{+0}$ | DNA          | [7]       |
| GNA12      | 2768            | rs1182188  | $1.40 \times 10^{-2}$  | $2.75 \times 10^{+3}$ | DNA          | [10]      |
| GSDMB      | 55876           | rs2872507  | $3.60 \times 10^{-2}$  | $1.19 \times 10^{+0}$ | DNA          | [7]       |
| IL12RB1    | 3594            | rs11575934 | $2.20 \times 10^{-2}$  | $7.26 \times 10^{-1}$ | DNA          | [7]       |
| IL15       | 3600            | N.A.       | $1.00 \times 10^{-2}$  | N.D.                  | protein      | [42]      |
| IL17A      | 3605            | N.A.       | $4.00 \times 10^{-2}$  | N.D.                  | protein      | [43]      |
| IL18RAP    | 8807            | rs6708413  | $4.50 \times 10^{-2}$  | $8.84 \times 10^{-3}$ | DNA          | [10]      |
| ITIH4      | 3700            | rs9847710  | $1.30 \times 10^{-2}$  | $2.55 \times 10^{-3}$ | DNA          | [10]      |
| LTBR       | 4055            | rs4149570  | $4.00 \times 10^{-2}$  | $1.56 \times 10^{+0}$ | DNA          | [49]      |
| MMEL1      | 79258           | rs3748816  | $1.20 \times 10^{-2}$  | $3.96 \times 10^{-1}$ | DNA          | [7]       |
| MUSTN1     | 389125          | rs9847710  | $1.30 \times 10^{-2}$  | $2.55 \times 10^{-3}$ | DNA          | [10]      |
| NP1PB7     | 440350          | rs8049439  | $5.60 \times 10^{-3}$  | $1.85 \times 10^{-1}$ | DNA          | [7]       |
| NT5DC2     | 64943           | rs9847710  | $1.30 \times 10^{-2}$  | $2.55 \times 10^{-3}$ | DNA          | [10]      |
| ORMDL3     | 94103           | rs2872507  | $3.60 \times 10^{-2}$  | $1.19 \times 10^{+0}$ | DNA          | [7]       |
| PARK7      | 11315           | rs3766606  | $2.20 \times 10^{-2}$  | $4.32 \times 10^{-3}$ | DNA          | [10]      |
| PRXL2B     | 127281          | rs3748816  | $1.20 \times 10^{-2}$  | $3.96 \times 10^{-1}$ | DNA          | [7]       |
| RBM43      | 375287          | rs11677200 | $1.70 \times 10^{-2}$  | $2.04 \times 10^{-1}$ | DNA          | [85]      |
| RBM6       | 10180           | rs3197999  | $2.50 \times 10^{-2}$  | $4.91 \times 10^{-3}$ | DNA          | [10]      |
| RPRD2      | 23248           | rs13294    | $4.50 \times 10^{-2}$  | $1.49 \times 10^{+0}$ | DNA          | [7]       |
| RPS23P10   | 100419471       | rs396991   | $3.00 \times 10^{-3}$  | $3.00 \times 10^{-3}$ | DNA          | [23]      |
|            |                 |            | $2.10 \times 10^{-2}$  | $6.93 \times 10^{-1}$ |              | [7]       |
| SCARNA4    | 677771          | N.A.       | $2.24 \times 10^{-2}$  | $8.96 \times 10^{-1}$ | RNA          | [31]      |
| SFG29      | 112869          | rs8049439  | $5.60 \times 10^{-3}$  | $1.85 \times 10^{-1}$ | DNA          | [7]       |
| SLC22A5    | 6584            | rs2522057  | $2.40 \times 10^{-2}$  | $4.80 \times 10^{-2}$ | DNA          | [28]      |
|            |                 | rs35260072 | $2.40 \times 10^{-2}$  | $4.80 \times 10^{-2}$ |              |           |
|            |                 | rs1050152  | $2.40 \times 10^{-2}$  | $7.92 \times 10^{-1}$ |              | [7]       |
| SPNS1      | 83985           | rs8049439  | $5.60 \times 10^{-3}$  | $1.85 \times 10^{-1}$ | DNA          | [7]       |
| SULT1A1    | 6817            | rs8049439  | $5.60 \times 10^{-3}$  | $1.85 \times 10^{-1}$ | DNA          | [7]       |
| SULT1A2    | 6799            | rs8049439  | $5.60 \times 10^{-3}$  | $1.85 \times 10^{-1}$ | DNA          | [7]       |
| TGFB1      | 7040            | N.A.       | $<5.00 \times 10^{-3}$ | N.D.                  | protein      | [44]      |
| TLR4       | 7099            | rs5030728  | $3.00 \times 10^{-2}$  | $1.17 \times 10^{+0}$ | DNA          | [49]      |
| TMEM176A   | 55365           | N.A.       | $2.36 \times 10^{-2}$  | $8.96 \times 10^{-1}$ | RNA          | [31]      |
| TNF        | 7124            | N.A.       | $3.50 \times 10^{-2}$  | N.D.                  | protein      | [45]      |

|                |        |            |                       |                       |     |      |
|----------------|--------|------------|-----------------------|-----------------------|-----|------|
| <i>TNFAIP6</i> | 7130   | rs11677200 | $1.70 \times 10^{-2}$ | $2.04 \times 10^{-1}$ | DNA | [85] |
| <i>TNFSF15</i> | 9966   | rs4263839  | $2.70 \times 10^{-2}$ | $8.91 \times 10^{-1}$ | DNA | [7]  |
| <i>TRIM38</i>  | 10475  | rs2071303  | $8.20 \times 10^{-3}$ | $1.64 \times 10^{-2}$ | DNA | [9]  |
| <i>TUFM</i>    | 7284   | rs8049439  | $5.60 \times 10^{-3}$ | $1.85 \times 10^{-1}$ | DNA | [7]  |
| <i>UBA7</i>    | 7318   | rs3197999  | $2.50 \times 10^{-2}$ | $4.91 \times 10^{-3}$ | DNA | [10] |
| <i>ZFP90</i>   | 146198 | rs1728785  | $4.50 \times 10^{-2}$ | $8.84 \times 10^{-3}$ | DNA | [10] |

Markers with more than one confirmation are represented in bold; adjusted p-values not originally reported but calculated here are represented in italics; N.A. (not applicable); N.D. (not defined)

**Supplementary Table S8.** Integrated blood markers linked to long-term anti-TNF response in CD patients.

| gene name     | NCBI<br>gene ID | SNP        | p-value               | adjusted p-<br>value  | data<br>type | reference |
|---------------|-----------------|------------|-----------------------|-----------------------|--------------|-----------|
| AC034220.3    | N.A.            | rs2631372  | $3.90 \times 10^{-2}$ | $1.29 \times 10^{+0}$ | DNA          | [7]       |
| AC116366.6    | N.A.            | rs2631372  | $3.90 \times 10^{-2}$ | $1.29 \times 10^{+0}$ | DNA          | [7]       |
| ATP6V1G2      | 534             | rs1799724  | $2.50 \times 10^{-3}$ | $4.00 \times 10^{-2}$ | DNA          | [29]      |
| C4A           | 720             | rs1800629  | $4.90 \times 10^{-2}$ | $3.43 \times 10^{-1}$ | DNA          | [47]      |
| C4B           | 721             | rs1800629  | $4.90 \times 10^{-2}$ | $3.43 \times 10^{-1}$ | DNA          | [47]      |
| CCHCR1        | 54535           | rs1800629  | $4.90 \times 10^{-2}$ | $3.43 \times 10^{-1}$ | DNA          | [47]      |
| CREM          | 1390            | rs12777960 | $3.70 \times 10^{-2}$ | $1.22 \times 10^{+0}$ | DNA          | [7]       |
| CYP21A1P      | 1590            | rs1800629  | $4.90 \times 10^{-2}$ | $3.43 \times 10^{-1}$ | DNA          | [47]      |
| CYP21A2       | 1589            | rs1800629  | $4.90 \times 10^{-2}$ | $3.43 \times 10^{-1}$ | DNA          | [47]      |
| IL6           | 3569            | N.A.       | $2.90 \times 10^{-2}$ | N.D.                  | protein      | [46]      |
| LINC00243     | 401247          | rs1800629  | $4.90 \times 10^{-2}$ | $3.43 \times 10^{-1}$ | DNA          | [47]      |
| MAPRE1        | 22919           | rs6087990  | $1.30 \times 10^{-2}$ | $2.55 \times 10^{+3}$ | DNA          | [10]      |
| MMEL1         | 79258           | rs3748816  | $1.20 \times 10^{-2}$ | $3.96 \times 10^{-1}$ | DNA          | [7]       |
| NCR3          | 259197          | rs1799724  | $2.50 \times 10^{-3}$ | $4.00 \times 10^{-2}$ | DNA          | [29]      |
| POU5F1        | 5460            | rs1800629  | $4.90 \times 10^{-2}$ | $3.43 \times 10^{-1}$ | DNA          | [47]      |
| PRXL2B        | 127281          | rs3748816  | $1.20 \times 10^{-2}$ | $3.96 \times 10^{-1}$ | DNA          | [7]       |
| RP5-1085F17.3 | N.A.            | rs6087990  | $1.30 \times 10^{-2}$ | $2.55 \times 10^{+3}$ | DNA          | [10]      |
| RPS23P10      | 100419471       | rs396991   | $3.10 \times 10^{-2}$ | $1.02 \times 10^{+0}$ | DNA          | [7]       |
| SULT1A2       | 6799            | rs7201929  | $8.10 \times 10^{-5}$ | $1.59 \times 10^{+1}$ | DNA          | [10]      |
|               |                 | rs35725751 | $9.30 \times 10^{-5}$ | $1.83 \times 10^{+1}$ |              |           |
| <b>TREM1</b>  | 54210           | N.A.       | $2.00 \times 10^{-2}$ | $2.00 \times 10^{-2}$ | RNA          | [33]      |
|               |                 |            | $1.00 \times 10^{-3}$ | N.D.                  | protein      |           |
| TUFM          | 7284            | rs7201929  | $8.10 \times 10^{-5}$ | $1.59 \times 10^{+1}$ | DNA          | [10]      |
|               |                 | rs35725751 | $9.30 \times 10^{-5}$ | $1.83 \times 10^{+1}$ |              |           |

Markers with more than one confirmation are represented in bold; adjusted p-values not originally reported but calculated here are represented in italics; N.A. (not applicable); N.D. (not defined)

**Supplementary Table S9.** GO analysis of the integrated colon markers linked to the short-term anti-TNF response in CD patients.

| GO ID      | GO term                                                            | ontology<br>source | p-value               | adjusted<br>value     | p-<br>% assoc.<br>genes | nr. assoc.<br>genes |
|------------|--------------------------------------------------------------------|--------------------|-----------------------|-----------------------|-------------------------|---------------------|
| GO:0005125 | cytokine activity                                                  | MF                 | $8.48 \times 10^{-7}$ | $5.43 \times 10^{-5}$ | 9.33                    | 7                   |
| GO:0006935 | chemotaxis                                                         | BP                 | $2.75 \times 10^{-6}$ | $1.73 \times 10^{-4}$ | 4.06                    | 11                  |
| GO:0048018 | receptor ligand activity                                           | MF                 | $2.86 \times 10^{-6}$ | $1.77 \times 10^{-4}$ | 5.26                    | 9                   |
| GO:0033138 | positive regulation of peptidyl-serine phosphorylation             | BP                 | $6.35 \times 10^{-6}$ | $3.87 \times 10^{-4}$ | 6.93                    | 7                   |
| GO:0002683 | negative regulation of immune system process                       | BP                 | $1.42 \times 10^{-5}$ | $8.37 \times 10^{-4}$ | 3.80                    | 10                  |
| GO:0050900 | leukocyte migration                                                | BP                 | $1.40 \times 10^{-5}$ | $8.42 \times 10^{-4}$ | 4.33                    | 9                   |
| GO:0032102 | negative regulation of response to external stimulus               | BP                 | $1.74 \times 10^{-5}$ | $1.01 \times 10^{-3}$ | 4.91                    | 8                   |
| GO:0060326 | cell chemotaxis                                                    | BP                 | $2.35 \times 10^{-5}$ | $1.34 \times 10^{-3}$ | 4.05                    | 9                   |
| GO:0050922 | negative regulation of chemotaxis                                  | BP                 | $4.55 \times 10^{-5}$ | $2.45 \times 10^{-3}$ | 13.79                   | 4                   |
| GO:0050731 | positive regulation of peptidyl-tyrosine phosphorylation           | BP                 | $4.42 \times 10^{-5}$ | $2.47 \times 10^{-3}$ | 5.15                    | 7                   |
| GO:0019730 | antimicrobial humoral response                                     | BP                 | $4.51 \times 10^{-5}$ | $2.48 \times 10^{-3}$ | 6.45                    | 6                   |
| GO:0042056 | chemoattractant activity                                           | MF                 | $6.77 \times 10^{-5}$ | $3.59 \times 10^{-3}$ | 12.50                   | 4                   |
| GO:0002768 | immune response-regulating cell surface receptor signaling pathway | BP                 | $7.57 \times 10^{-5}$ | $3.94 \times 10^{-3}$ | 5.88                    | 6                   |
| GO:0007159 | leukocyte cell-cell adhesion                                       | BP                 | $9.86 \times 10^{-5}$ | $5.03 \times 10^{-3}$ | 3.85                    | 8                   |
| GO:0071222 | cellular response to lipopolysaccharide                            | BP                 | $1.40 \times 10^{-4}$ | $7.01 \times 10^{-3}$ | 5.26                    | 6                   |
| GO:0097529 | myeloid leukocyte migration                                        | BP                 | $1.86 \times 10^{-4}$ | $9.10 \times 10^{-3}$ | 5.00                    | 6                   |
| GO:0006909 | phagocytosis                                                       | BP                 | $1.94 \times 10^{-4}$ | $9.31 \times 10^{-3}$ | 6.49                    | 5                   |
| GO:0030336 | negative regulation of cell migration                              | BP                 | $2.15 \times 10^{-4}$ | $1.01 \times 10^{-2}$ | 3.43                    | 8                   |
| GO:0032103 | positive regulation of response to external stimulus               | BP                 | $2.30 \times 10^{-4}$ | $1.06 \times 10^{-2}$ | 3.95                    | 7                   |
| GO:0006954 | inflammatory response                                              | BP                 | $2.55 \times 10^{-4}$ | $1.15 \times 10^{-2}$ | 3.89                    | 7                   |
| GO:0031663 | lipopolysaccharide-mediated signaling pathway                      | BP                 | $2.62 \times 10^{-4}$ | $1.15 \times 10^{-2}$ | 8.89                    | 4                   |
| GO:0030593 | neutrophil chemotaxis                                              | BP                 | $2.85 \times 10^{-4}$ | $1.23 \times 10^{-2}$ | 8.70                    | 4                   |
| GO:0001516 | prostaglandin biosynthetic process                                 | BP                 | $3.40 \times 10^{-4}$ | $1.43 \times 10^{-2}$ | 15.00                   | 3                   |
| GO:0048246 | macrophage chemotaxis                                              | BP                 | $3.40 \times 10^{-4}$ | $1.43 \times 10^{-2}$ | 15.00                   | 3                   |
| GO:0048661 | positive regulation of smooth muscle cell proliferation            | BP                 | $3.65 \times 10^{-4}$ | $1.49 \times 10^{-2}$ | 8.16                    | 4                   |
| GO:0050901 | leukocyte tethering or rolling                                     | BP                 | $3.94 \times 10^{-4}$ | $1.58 \times 10^{-2}$ | 14.29                   | 3                   |
| GO:0006897 | endocytosis                                                        | BP                 | $4.27 \times 10^{-4}$ | $1.67 \times 10^{-2}$ | 3.10                    | 8                   |
| GO:0050920 | regulation of chemotaxis                                           | BP                 | $4.43 \times 10^{-4}$ | $1.68 \times 10^{-2}$ | 4.26                    | 6                   |
| GO:0042119 | neutrophil activation                                              | BP                 | $5.20 \times 10^{-4}$ | $1.87 \times 10^{-2}$ | 13.04                   | 3                   |
| GO:0030595 | leukocyte chemotaxis                                               | BP                 | $5.14 \times 10^{-4}$ | $1.90 \times 10^{-2}$ | 4.14                    | 6                   |
| GO:0045670 | regulation of osteoclast differentiation                           | BP                 | $5.91 \times 10^{-4}$ | $2.07 \times 10^{-2}$ | 12.50                   | 3                   |
| GO:0051897 | positive regulation of protein kinase B signaling                  | BP                 | $2.13 \times 10^{-2}$ | $2.13 \times 10^{-2}$ | 3.53                    | 3                   |
| GO:0030888 | regulation of B cell proliferation                                 | BP                 | $7.52 \times 10^{-4}$ | $2.56 \times 10^{-2}$ | 11.54                   | 3                   |
| GO:2001234 | negative regulation of apoptotic signaling pathway                 | BP                 | $9.50 \times 10^{-4}$ | $3.04 \times 10^{-2}$ | 3.68                    | 6                   |
| GO:0061138 | morphogenesis of a branching epithelium                            | BP                 | $9.38 \times 10^{-4}$ | $3.09 \times 10^{-2}$ | 10.71                   | 3                   |
| GO:1901031 | regulation of response to reactive oxygen species                  | BP                 | $1.04 \times 10^{-3}$ | $3.23 \times 10^{-2}$ | 10.34                   | 3                   |
| GO:0050715 | positive regulation of cytokine secretion                          | BP                 | $1.18 \times 10^{-3}$ | $3.53 \times 10^{-2}$ | 4.39                    | 5                   |
| GO:0045807 | positive regulation of endocytosis                                 | BP                 | $1.87 \times 10^{-2}$ | $3.75 \times 10^{-2}$ | 3.70                    | 3                   |
| GO:0010596 | negative regulation of endothelial cell migration                  | BP                 | $9.96 \times 10^{-3}$ | $3.98 \times 10^{-2}$ | 4.69                    | 3                   |
| GO:0008083 | growth factor activity                                             | MF                 | $1.52 \times 10^{-3}$ | $4.42 \times 10^{-2}$ | 9.09                    | 3                   |
| GO:0050670 | regulation of lymphocyte proliferation                             | BP                 | $1.90 \times 10^{-3}$ | $4.56 \times 10^{-2}$ | 3.94                    | 5                   |



**Supplementary Table S10.** GO analysis of the extended interactome of integrated colon markers linked to the short-term anti-TNF response in CD patients.

| GO ID      | GO term                                                   | ontology | p-value                | adjusted               | p-    | %     | assoc. | nr. assoc. |
|------------|-----------------------------------------------------------|----------|------------------------|------------------------|-------|-------|--------|------------|
|            |                                                           | source   |                        | value                  | genes | genes | genes  |            |
| GO:0006915 | apoptotic process                                         | BP       | $1.62 \times 10^{-26}$ | $1.84 \times 10^{-23}$ | 8.19  |       |        | 92         |
| GO:0048583 | regulation of response to stimulus                        | BP       | $6.61 \times 10^{-25}$ | $7.52 \times 10^{-22}$ | 5.80  |       |        | 135        |
| GO:0048584 | positive regulation of response to stimulus               | BP       | $1.38 \times 10^{-24}$ | $1.57 \times 10^{-21}$ | 7.20  |       |        | 100        |
| GO:0007166 | cell surface receptor signaling pathway                   | BP       | $6.43 \times 10^{-23}$ | $7.30 \times 10^{-20}$ | 7.25  |       |        | 93         |
| GO:0042981 | regulation of apoptotic process                           | BP       | $7.07 \times 10^{-23}$ | $8.02 \times 10^{-20}$ | 8.28  |       |        | 79         |
| GO:0007165 | signal transduction                                       | BP       | $7.47 \times 10^{-23}$ | $8.46 \times 10^{-20}$ | 5.32  |       |        | 143        |
| GO:0010941 | regulation of cell death                                  | BP       | $5.32 \times 10^{-22}$ | $6.02 \times 10^{-19}$ | 7.70  |       |        | 83         |
| GO:0070887 | cellular response to chemical stimulus                    | BP       | $4.68 \times 10^{-21}$ | $5.29 \times 10^{-18}$ | 6.25  |       |        | 105        |
| GO:0048518 | positive regulation of biological process                 | BP       | $9.53 \times 10^{-21}$ | $1.08 \times 10^{-17}$ | 4.44  |       |        | 179        |
| GO:0051246 | regulation of protein metabolic process                   | BP       | $3.68 \times 10^{-20}$ | $4.16 \times 10^{-17}$ | 5.89  |       |        | 110        |
| GO:0032268 | regulation of cellular protein metabolic process          | BP       | $1.03 \times 10^{-19}$ | $1.16 \times 10^{-16}$ | 6.00  |       |        | 105        |
| GO:0009966 | regulation of signal transduction                         | BP       | $3.47 \times 10^{-19}$ | $3.91 \times 10^{-16}$ | 5.87  |       |        | 106        |
| GO:0048519 | negative regulation of biological process                 | BP       | $4.38 \times 10^{-19}$ | $4.93 \times 10^{-16}$ | 4.61  |       |        | 157        |
| GO:0010646 | regulation of cell communication                          | BP       | $1.00 \times 10^{-18}$ | $1.13 \times 10^{-15}$ | 5.71  |       |        | 108        |
| GO:0071310 | cellular response to organic substance                    | BP       | $1.81 \times 10^{-18}$ | $2.04 \times 10^{-15}$ | 6.66  |       |        | 85         |
| GO:0023051 | regulation of signaling                                   | BP       | $2.20 \times 10^{-18}$ | $2.47 \times 10^{-15}$ | 5.65  |       |        | 108        |
| GO:0010033 | response to organic substance                             | BP       | $2.43 \times 10^{-18}$ | $2.73 \times 10^{-15}$ | 6.14  |       |        | 95         |
| GO:0048523 | negative regulation of cellular process                   | BP       | $3.54 \times 10^{-18}$ | $3.97 \times 10^{-15}$ | 4.72  |       |        | 145        |
| GO:0019899 | enzyme binding                                            | MF       | $4.03 \times 10^{-18}$ | $4.51 \times 10^{-15}$ | 5.82  |       |        | 102        |
| GO:0048522 | positive regulation of cellular process                   | BP       | $5.46 \times 10^{-18}$ | $6.11 \times 10^{-15}$ | 4.44  |       |        | 161        |
| GO:0097190 | apoptotic signaling pathway                               | BP       | $9.74 \times 10^{-18}$ | $1.09 \times 10^{-14}$ | 10.77 |       |        | 46         |
| GO:0023056 | positive regulation of signaling                          | BP       | $1.05 \times 10^{-17}$ | $1.18 \times 10^{-14}$ | 7.08  |       |        | 75         |
| GO:0031399 | regulation of protein modification process                | BP       | $1.12 \times 10^{-17}$ | $1.25 \times 10^{-14}$ | 6.52  |       |        | 84         |
| GO:0032270 | positive regulation of cellular protein metabolic process | BP       | $1.33 \times 10^{-17}$ | $1.48 \times 10^{-14}$ | 6.85  |       |        | 78         |
| GO:0051247 | positive regulation of protein metabolic process          | BP       | $1.46 \times 10^{-17}$ | $1.62 \times 10^{-14}$ | 6.66  |       |        | 81         |
| GO:0010647 | positive regulation of cell communication                 | BP       | $2.53 \times 10^{-17}$ | $2.82 \times 10^{-14}$ | 7.03  |       |        | 74         |
| GO:0009967 | positive regulation of signal transduction                | BP       | $3.88 \times 10^{-17}$ | $4.31 \times 10^{-14}$ | 7.12  |       |        | 72         |
| GO:0035556 | intracellular signal transduction                         | BP       | $4.46 \times 10^{-17}$ | $4.96 \times 10^{-14}$ | 5.92  |       |        | 94         |
| GO:0080134 | regulation of response to stress                          | BP       | $1.26 \times 10^{-16}$ | $1.40 \times 10^{-13}$ | 7.35  |       |        | 67         |
| GO:0051128 | regulation of cellular component organization             | BP       | $6.85 \times 10^{-16}$ | $7.60 \times 10^{-13}$ | 5.83  |       |        | 90         |
| GO:2001233 | regulation of apoptotic signaling pathway                 | BP       | $7.24 \times 10^{-16}$ | $8.02 \times 10^{-13}$ | 12.29 |       |        | 36         |
| GO:0043065 | positive regulation of apoptotic process                  | BP       | $1.13 \times 10^{-15}$ | $1.26 \times 10^{-12}$ | 10.14 |       |        | 43         |
| GO:0043066 | negative regulation of apoptotic process                  | BP       | $1.20 \times 10^{-15}$ | $1.33 \times 10^{-12}$ | 9.16  |       |        | 48         |
| GO:0044267 | cellular protein metabolic process                        | BP       | $1.82 \times 10^{-15}$ | $2.01 \times 10^{-12}$ | 4.54  |       |        | 137        |
| GO:0031401 | positive regulation of protein modification process       | BP       | $1.84 \times 10^{-15}$ | $2.03 \times 10^{-12}$ | 7.20  |       |        | 64         |
| GO:0010942 | positive regulation of cell death                         | BP       | $2.00 \times 10^{-15}$ | $2.21 \times 10^{-12}$ | 9.57  |       |        | 45         |
| GO:0019538 | protein metabolic process                                 | BP       | $2.11 \times 10^{-15}$ | $2.32 \times 10^{-12}$ | 4.39  |       |        | 146        |
| GO:1902531 | regulation of intracellular signal transduction           | BP       | $2.50 \times 10^{-15}$ | $2.75 \times 10^{-12}$ | 6.40  |       |        | 75         |
| GO:0060548 | negative regulation of cell death                         | BP       | $2.62 \times 10^{-15}$ | $2.88 \times 10^{-12}$ | 8.53  |       |        | 51         |
| GO:0031625 | ubiquitin protein ligase binding                          | MF       | $6.81 \times 10^{-15}$ | $7.48 \times 10^{-12}$ | 11.78 |       |        | 35         |
| GO:0050794 | regulation of cellular process                            | BP       | $6.86 \times 10^{-15}$ | $7.53 \times 10^{-12}$ | 3.61  |       |        | 215        |
| GO:0030162 | regulation of proteolysis                                 | BP       | $8.03 \times 10^{-15}$ | $8.81 \times 10^{-12}$ | 9.22  |       |        | 45         |
| GO:0006464 | cellular protein modification process                     | BP       | $8.81 \times 10^{-15}$ | $9.65 \times 10^{-12}$ | 4.81  |       |        | 118        |
| GO:0051173 | positive regulation of nitrogen compound metabolic        | BP       | $1.46 \times 10^{-14}$ | $1.60 \times 10^{-11}$ | 4.91  |       |        | 112        |
| GO:0042325 | regulation of phosphorylation                             | BP       | $1.76 \times 10^{-14}$ | $1.92 \times 10^{-11}$ | 6.46  |       |        | 70         |
| GO:0006468 | protein phosphorylation                                   | BP       | $1.89 \times 10^{-14}$ | $2.07 \times 10^{-11}$ | 6.01  |       |        | 78         |
| GO:0031325 | positive regulation of cellular metabolic process         | BP       | $1.98 \times 10^{-14}$ | $2.16 \times 10^{-11}$ | 4.82  |       |        | 115        |
| GO:0097191 | extrinsic apoptotic signaling pathway                     | BP       | $2.07 \times 10^{-14}$ | $2.26 \times 10^{-11}$ | 15.85 |       |        | 26         |
| GO:0005102 | signaling receptor binding                                | MF       | $2.36 \times 10^{-14}$ | $2.57 \times 10^{-11}$ | 6.54  |       |        | 68         |
| GO:0001932 | regulation of protein phosphorylation                     | BP       | $2.65 \times 10^{-14}$ | $2.89 \times 10^{-11}$ | 6.59  |       |        | 67         |



|            |                                                                            |    |                        |                        |       |     |
|------------|----------------------------------------------------------------------------|----|------------------------|------------------------|-------|-----|
| GO:0019220 | regulation of phosphate metabolic process                                  | BP | $3.09 \times 10^{-14}$ | $3.36 \times 10^{-11}$ | 6.11  | 75  |
| GO:0010605 | negative regulation of macromolecule metabolic process                     | BP | $3.32 \times 10^{-14}$ | $3.61 \times 10^{-11}$ | 5.36  | 93  |
| GO:0043412 | macromolecule modification                                                 | BP | $3.97 \times 10^{-14}$ | $4.31 \times 10^{-11}$ | 4.69  | 119 |
| GO:0030154 | cell differentiation                                                       | BP | $4.17 \times 10^{-14}$ | $4.52 \times 10^{-11}$ | 6.02  | 76  |
| GO:0016310 | phosphorylation                                                            | BP | $4.80 \times 10^{-14}$ | $5.20 \times 10^{-11}$ | 5.73  | 82  |
| GO:0042802 | identical protein binding                                                  | MF | $8.09 \times 10^{-14}$ | $8.76 \times 10^{-11}$ | 5.35  | 91  |
| GO:0009892 | negative regulation of metabolic process                                   | BP | $8.30 \times 10^{-14}$ | $8.98 \times 10^{-11}$ | 5.13  | 98  |
| GO:0031323 | regulation of cellular metabolic process                                   | BP | $9.57 \times 10^{-14}$ | $1.03 \times 10^{-10}$ | 4.11  | 153 |
| GO:0010604 | positive regulation of macromolecule metabolic process                     | BP | $9.70 \times 10^{-14}$ | $1.05 \times 10^{-10}$ | 4.73  | 114 |
| GO:0019222 | regulation of metabolic process                                            | BP | $1.04 \times 10^{-13}$ | $1.12 \times 10^{-10}$ | 4.04  | 159 |
| GO:0009893 | positive regulation of metabolic process                                   | BP | $1.40 \times 10^{-13}$ | $1.51 \times 10^{-10}$ | 4.63  | 118 |
| GO:0060255 | regulation of macromolecule metabolic process                              | BP | $1.73 \times 10^{-13}$ | $1.86 \times 10^{-10}$ | 4.11  | 151 |
| GO:0009057 | macromolecule catabolic process                                            | BP | $2.16 \times 10^{-13}$ | $2.33 \times 10^{-10}$ | 7.22  | 55  |
| GO:0051171 | regulation of nitrogen compound metabolic process                          | BP | $2.41 \times 10^{-13}$ | $2.59 \times 10^{-10}$ | 4.15  | 146 |
| GO:0032879 | regulation of localization                                                 | BP | $2.51 \times 10^{-13}$ | $2.70 \times 10^{-10}$ | 5.25  | 91  |
| GO:0001934 | positive regulation of protein phosphorylation                             | BP | $2.97 \times 10^{-13}$ | $3.18 \times 10^{-10}$ | 7.46  | 52  |
| GO:1901564 | organonitrogen compound metabolic process                                  | BP | $3.56 \times 10^{-13}$ | $3.81 \times 10^{-10}$ | 4.05  | 153 |
| GO:0051172 | negative regulation of nitrogen compound metabolic                         | BP | $3.66 \times 10^{-13}$ | $3.92 \times 10^{-10}$ | 5.41  | 85  |
| GO:0006508 | proteolysis                                                                | BP | $4.04 \times 10^{-13}$ | $4.32 \times 10^{-10}$ | 6.41  | 64  |
| GO:0050793 | regulation of developmental process                                        | BP | $4.91 \times 10^{-13}$ | $5.25 \times 10^{-10}$ | 5.98  | 71  |
| GO:0080090 | regulation of primary metabolic process                                    | BP | $5.63 \times 10^{-13}$ | $6.02 \times 10^{-10}$ | 4.10  | 147 |
| GO:0051248 | negative regulation of protein metabolic process                           | BP | $8.55 \times 10^{-13}$ | $9.12 \times 10^{-10}$ | 7.16  | 53  |
| GO:0045937 | positive regulation of phosphate metabolic process                         | BP | $9.36 \times 10^{-13}$ | $9.98 \times 10^{-10}$ | 6.96  | 55  |
| GO:0042176 | regulation of protein catabolic process                                    | BP | $9.43 \times 10^{-13}$ | $1.00 \times 10^{-9}$  | 11.23 | 31  |
| GO:0019904 | protein domain specific binding                                            | MF | $1.33 \times 10^{-12}$ | $1.42 \times 10^{-9}$  | 7.99  | 45  |
| GO:2001235 | positive regulation of apoptotic signaling pathway                         | BP | $1.60 \times 10^{-12}$ | $1.70 \times 10^{-9}$  | 17.07 | 21  |
| GO:0006793 | phosphorus metabolic process                                               | BP | $1.69 \times 10^{-12}$ | $1.80 \times 10^{-9}$  | 4.97  | 95  |
| GO:0048585 | negative regulation of response to stimulus                                | BP | $2.34 \times 10^{-12}$ | $2.49 \times 10^{-9}$  | 6.17  | 64  |
| GO:0002682 | regulation of immune system process                                        | BP | $2.42 \times 10^{-12}$ | $2.57 \times 10^{-9}$  | 6.80  | 55  |
| GO:0042127 | regulation of cell proliferation                                           | BP | $2.44 \times 10^{-12}$ | $2.58 \times 10^{-9}$  | 6.42  | 60  |
| GO:0031324 | negative regulation of cellular metabolic process                          | BP | $2.53 \times 10^{-12}$ | $2.68 \times 10^{-9}$  | 5.13  | 88  |
| GO:0033554 | cellular response to stress                                                | BP | $3.01 \times 10^{-12}$ | $3.19 \times 10^{-9}$  | 5.67  | 73  |
| GO:1903362 | regulation of cellular protein catabolic process                           | BP | $3.46 \times 10^{-12}$ | $3.65 \times 10^{-9}$  | 13.37 | 25  |
| GO:0033993 | response to lipid                                                          | BP | $4.87 \times 10^{-12}$ | $5.14 \times 10^{-9}$  | 9.00  | 37  |
| GO:0051239 | regulation of multicellular organismal process                             | BP | $6.19 \times 10^{-12}$ | $6.52 \times 10^{-9}$  | 5.31  | 80  |
| GO:0044093 | positive regulation of molecular function                                  | BP | $8.93 \times 10^{-12}$ | $9.40 \times 10^{-9}$  | 5.87  | 66  |
| GO:0044260 | cellular macromolecule metabolic process                                   | BP | $9.48 \times 10^{-12}$ | $9.97 \times 10^{-9}$  | 3.71  | 173 |
| GO:0030163 | protein catabolic process                                                  | BP | $9.75 \times 10^{-12}$ | $1.02 \times 10^{-8}$  | 7.80  | 43  |
| GO:1903320 | regulation of protein modification by small protein conjugation or removal | BP | $9.96 \times 10^{-12}$ | $1.05 \times 10^{-8}$  | 12.76 | 25  |
| GO:1902533 | positive regulation of intracellular signal transduction                   | BP | $1.57 \times 10^{-11}$ | $1.64 \times 10^{-8}$  | 6.91  | 50  |
| GO:0080135 | regulation of cellular response to stress                                  | BP | $2.24 \times 10^{-11}$ | $2.35 \times 10^{-8}$  | 7.88  | 41  |
| GO:0002684 | positive regulation of immune system process                               | BP | $2.34 \times 10^{-11}$ | $2.45 \times 10^{-8}$  | 7.47  | 44  |
| GO:0023057 | negative regulation of signaling                                           | BP | $2.53 \times 10^{-11}$ | $2.65 \times 10^{-8}$  | 6.40  | 55  |
| GO:0051130 | positive regulation of cellular component organization                     | BP | $3.49 \times 10^{-11}$ | $3.64 \times 10^{-8}$  | 6.67  | 51  |
| GO:0010648 | negative regulation of cell communication                                  | BP | $4.86 \times 10^{-11}$ | $5.08 \times 10^{-8}$  | 6.37  | 54  |
| GO:0043170 | macromolecule metabolic process                                            | BP | $4.92 \times 10^{-11}$ | $5.13 \times 10^{-8}$  | 3.54  | 186 |
| GO:2001236 | regulation of extrinsic apoptotic signaling pathway                        | BP | $5.46 \times 10^{-11}$ | $5.69 \times 10^{-8}$  | 16.10 | 19  |
| GO:0052547 | regulation of peptidase activity                                           | BP | $7.04 \times 10^{-11}$ | $7.33 \times 10^{-8}$  | 10.45 | 28  |
| GO:0044257 | cellular protein catabolic process                                         | BP | $7.88 \times 10^{-11}$ | $8.19 \times 10^{-8}$  | 8.19  | 37  |
| GO:0050790 | regulation of catalytic activity                                           | BP | $1.04 \times 10^{-10}$ | $1.08 \times 10^{-7}$  | 5.38  | 70  |
| GO:0044087 | regulation of cellular component biogenesis                                | BP | $1.18 \times 10^{-10}$ | $1.22 \times 10^{-7}$  | 6.90  | 46  |
| GO:0016477 | cell migration                                                             | BP | $1.21 \times 10^{-10}$ | $1.26 \times 10^{-7}$  | 6.15  | 55  |

|            |                                                                          |    |                        |                       |       |    |
|------------|--------------------------------------------------------------------------|----|------------------------|-----------------------|-------|----|
| GO:0007275 | multicellular organism development                                       | BP | $1.31 \times 10^{-10}$ | $1.35 \times 10^{-7}$ | 4.91  | 83 |
| GO:0031329 | regulation of cellular catabolic process                                 | BP | $1.43 \times 10^{-10}$ | $1.48 \times 10^{-7}$ | 7.56  | 40 |
| GO:0044265 | cellular macromolecule catabolic process                                 | BP | $1.45 \times 10^{-10}$ | $1.50 \times 10^{-7}$ | 6.96  | 45 |
| GO:0009968 | negative regulation of signal transduction                               | BP | $1.49 \times 10^{-10}$ | $1.53 \times 10^{-7}$ | 6.33  | 52 |
| GO:0032269 | negative regulation of cellular protein metabolic process                | BP | $1.54 \times 10^{-10}$ | $1.59 \times 10^{-7}$ | 6.74  | 47 |
| GO:0009894 | regulation of catabolic process                                          | BP | $1.60 \times 10^{-10}$ | $1.65 \times 10^{-7}$ | 7.15  | 43 |
| GO:1901700 | response to oxygen-containing compound                                   | BP | $1.96 \times 10^{-10}$ | $2.02 \times 10^{-7}$ | 6.70  | 47 |
| GO:0018193 | peptidyl-amino acid modification                                         | BP | $2.82 \times 10^{-10}$ | $2.91 \times 10^{-7}$ | 6.29  | 51 |
| GO:0051336 | regulation of hydrolase activity                                         | BP | $3.27 \times 10^{-10}$ | $3.36 \times 10^{-7}$ | 6.69  | 46 |
| GO:1901565 | organonitrogen compound catabolic process                                | BP | $3.45 \times 10^{-10}$ | $3.54 \times 10^{-7}$ | 6.58  | 47 |
| GO:0005126 | cytokine receptor binding                                                | MF | $3.48 \times 10^{-10}$ | $3.57 \times 10^{-7}$ | 12.96 | 21 |
| GO:0045862 | positive regulation of proteolysis                                       | BP | $3.87 \times 10^{-10}$ | $3.96 \times 10^{-7}$ | 10.04 | 27 |
| GO:0016032 | viral process                                                            | BP | $4.10 \times 10^{-10}$ | $4.20 \times 10^{-7}$ | 9.69  | 28 |
| GO:1901701 | cellular response to oxygen-containing compound                          | BP | $4.57 \times 10^{-10}$ | $4.68 \times 10^{-7}$ | 7.27  | 40 |
| GO:0052548 | regulation of endopeptidase activity                                     | BP | $4.95 \times 10^{-10}$ | $5.06 \times 10^{-7}$ | 10.28 | 26 |
| GO:0071396 | cellular response to lipid                                               | BP | $5.18 \times 10^{-10}$ | $5.29 \times 10^{-7}$ | 9.04  | 30 |
| GO:0019900 | kinase binding                                                           | MF | $5.49 \times 10^{-10}$ | $5.60 \times 10^{-7}$ | 6.99  | 42 |
| GO:0097193 | intrinsic apoptotic signaling pathway                                    | BP | $5.79 \times 10^{-10}$ | $5.90 \times 10^{-7}$ | 11.01 | 24 |
| GO:0043254 | regulation of protein complex assembly                                   | BP | $6.60 \times 10^{-10}$ | $6.72 \times 10^{-7}$ | 9.21  | 29 |
| GO:0014070 | response to organic cyclic compound                                      | BP | $6.81 \times 10^{-10}$ | $6.93 \times 10^{-7}$ | 8.27  | 33 |
| GO:0030334 | regulation of cell migration                                             | BP | $7.14 \times 10^{-10}$ | $7.26 \times 10^{-7}$ | 6.72  | 44 |
| GO:0098609 | cell-cell adhesion                                                       | BP | $7.26 \times 10^{-10}$ | $7.37 \times 10^{-7}$ | 8.25  | 33 |
| GO:0044248 | cellular catabolic process                                               | BP | $8.01 \times 10^{-10}$ | $8.12 \times 10^{-7}$ | 5.29  | 66 |
| GO:0008284 | positive regulation of cell proliferation                                | BP | $8.18 \times 10^{-10}$ | $8.29 \times 10^{-7}$ | 7.13  | 40 |
| GO:0044459 | plasma membrane part                                                     | CC | $8.47 \times 10^{-10}$ | $8.57 \times 10^{-7}$ | 5.46  | 62 |
| GO:0071407 | cellular response to organic cyclic compound                             | BP | $8.56 \times 10^{-10}$ | $8.65 \times 10^{-7}$ | 8.85  | 30 |
| GO:0031396 | regulation of protein ubiquitination                                     | BP | $8.59 \times 10^{-10}$ | $8.68 \times 10^{-7}$ | 12.35 | 21 |
| GO:0071495 | cellular response to endogenous stimulus                                 | BP | $9.51 \times 10^{-10}$ | $9.58 \times 10^{-7}$ | 6.47  | 46 |
| GO:0006952 | defense response                                                         | BP | $9.50 \times 10^{-10}$ | $9.59 \times 10^{-7}$ | 6.66  | 44 |
| GO:0034097 | response to cytokine                                                     | BP | $1.06 \times 10^{-9}$  | $1.07 \times 10^{-6}$ | 7.94  | 34 |
| GO:0051049 | regulation of transport                                                  | BP | $1.25 \times 10^{-9}$  | $1.26 \times 10^{-6}$ | 5.65  | 57 |
| GO:1903050 | regulation of proteolysis involved in cellular protein catabolic process | BP | $1.26 \times 10^{-9}$  | $1.27 \times 10^{-6}$ | 12.74 | 20 |
| GO:0002020 | protease binding                                                         | MF | $1.33 \times 10^{-9}$  | $1.33 \times 10^{-6}$ | 14.29 | 18 |
| GO:0000165 | MAPK cascade                                                             | BP | $1.36 \times 10^{-9}$  | $1.36 \times 10^{-6}$ | 7.13  | 39 |
| GO:2000116 | regulation of cysteine-type endopeptidase activity                       | BP | $1.62 \times 10^{-9}$  | $1.63 \times 10^{-6}$ | 10.90 | 23 |
| GO:0043933 | protein-containing complex subunit organization                          | BP | $1.64 \times 10^{-9}$  | $1.64 \times 10^{-6}$ | 5.24  | 65 |
| GO:0045595 | regulation of cell differentiation                                       | BP | $2.51 \times 10^{-9}$  | $2.51 \times 10^{-6}$ | 6.28  | 46 |
| GO:0030155 | regulation of cell adhesion                                              | BP | $2.91 \times 10^{-9}$  | $2.91 \times 10^{-6}$ | 7.64  | 34 |
| GO:0044403 | symbiont process                                                         | BP | $2.92 \times 10^{-9}$  | $2.91 \times 10^{-6}$ | 8.40  | 30 |
| GO:0044092 | negative regulation of molecular function                                | BP | $3.13 \times 10^{-9}$  | $3.12 \times 10^{-6}$ | 6.15  | 47 |
| GO:0006810 | transport                                                                | BP | $3.14 \times 10^{-9}$  | $3.13 \times 10^{-6}$ | 4.36  | 94 |
| GO:2001238 | positive regulation of extrinsic apoptotic signaling                     | BP | $4.03 \times 10^{-9}$  | $4.01 \times 10^{-6}$ | 25.58 | 11 |
| GO:2000377 | regulation of reactive oxygen species metabolic process                  | BP | $4.29 \times 10^{-9}$  | $4.26 \times 10^{-6}$ | 16.48 | 15 |
| GO:0009653 | anatomical structure morphogenesis                                       | BP | $4.42 \times 10^{-9}$  | $4.39 \times 10^{-6}$ | 5.63  | 54 |
| GO:0010498 | proteasomal protein catabolic process                                    | BP | $5.87 \times 10^{-9}$  | $5.82 \times 10^{-6}$ | 9.47  | 25 |
| GO:2001242 | regulation of intrinsic apoptotic signaling pathway                      | BP | $5.88 \times 10^{-9}$  | $5.83 \times 10^{-6}$ | 13.04 | 18 |
| GO:0070997 | neuron death                                                             | BP | $6.42 \times 10^{-9}$  | $6.36 \times 10^{-6}$ | 13.82 | 17 |
| GO:0040012 | regulation of locomotion                                                 | BP | $6.91 \times 10^{-9}$  | $6.83 \times 10^{-6}$ | 6.16  | 45 |
| GO:0043161 | proteasome-mediated ubiquitin-dependent protein catabolic process        | BP | $7.12 \times 10^{-9}$  | $7.03 \times 10^{-6}$ | 10.53 | 22 |
| GO:1902532 | negative regulation of intracellular signal transduction                 | BP | $7.86 \times 10^{-9}$  | $7.76 \times 10^{-6}$ | 7.67  | 32 |
| GO:0065003 | protein-containing complex assembly                                      | BP | $7.92 \times 10^{-9}$  | $7.81 \times 10^{-6}$ | 5.28  | 59 |
| GO:0006898 | receptor-mediated endocytosis                                            | BP | $9.32 \times 10^{-9}$  | $9.18 \times 10^{-6}$ | 13.49 | 17 |

|            |                                                                                     |    |                       |                       |       |     |
|------------|-------------------------------------------------------------------------------------|----|-----------------------|-----------------------|-------|-----|
| GO:1901575 | organic substance catabolic process                                                 | BP | $9.50 \times 10^{-9}$ | $9.35 \times 10^{-6}$ | 5.30  | 58  |
| GO:2000026 | regulation of multicellular organismal development                                  | BP | $9.63 \times 10^{-9}$ | $9.46 \times 10^{-6}$ | 5.73  | 50  |
| GO:0051603 | proteolysis involved in cellular protein catabolic process                          | BP | $9.62 \times 10^{-9}$ | $9.46 \times 10^{-6}$ | 7.79  | 31  |
| GO:0045935 | positive regulation of nucleobase-containing compound metabolic process             | BP | $1.06 \times 10^{-8}$ | $1.04 \times 10^{-5}$ | 4.86  | 69  |
| GO:0006511 | ubiquitin-dependent protein catabolic process                                       | BP | $1.22 \times 10^{-8}$ | $1.20 \times 10^{-5}$ | 8.57  | 27  |
| GO:0006954 | inflammatory response                                                               | BP | $1.39 \times 10^{-8}$ | $1.36 \times 10^{-5}$ | 11.11 | 20  |
| GO:2001234 | negative regulation of apoptotic signaling pathway                                  | BP | $1.46 \times 10^{-8}$ | $1.43 \times 10^{-5}$ | 11.66 | 19  |
| GO:0043408 | regulation of MAPK cascade                                                          | BP | $1.53 \times 10^{-8}$ | $1.50 \times 10^{-5}$ | 7.01  | 35  |
| GO:0022607 | cellular component assembly                                                         | BP | $1.63 \times 10^{-8}$ | $1.59 \times 10^{-5}$ | 4.53  | 79  |
| GO:0010629 | negative regulation of gene expression                                              | BP | $1.67 \times 10^{-8}$ | $1.63 \times 10^{-5}$ | 5.13  | 60  |
| GO:0048660 | regulation of smooth muscle cell proliferation                                      | BP | $1.68 \times 10^{-8}$ | $1.63 \times 10^{-5}$ | 16.28 | 14  |
| GO:0006897 | endocytosis                                                                         | BP | $1.69 \times 10^{-8}$ | $1.64 \times 10^{-5}$ | 9.30  | 24  |
| GO:0043900 | regulation of multi-organism process                                                | BP | $1.77 \times 10^{-8}$ | $1.72 \times 10^{-5}$ | 8.19  | 28  |
| GO:0051094 | positive regulation of developmental process                                        | BP | $1.83 \times 10^{-8}$ | $1.77 \times 10^{-5}$ | 6.30  | 41  |
| GO:0018105 | peptidyl-serine phosphorylation                                                     | BP | $1.83 \times 10^{-8}$ | $1.78 \times 10^{-5}$ | 10.00 | 22  |
| GO:0071944 | cell periphery                                                                      | CC | $1.88 \times 10^{-8}$ | $1.82 \times 10^{-5}$ | 4.05  | 104 |
| GO:0098657 | import into cell                                                                    | BP | $1.97 \times 10^{-8}$ | $1.90 \times 10^{-5}$ | 8.64  | 26  |
| GO:0005886 | plasma membrane                                                                     | CC | $1.99 \times 10^{-8}$ | $1.92 \times 10^{-5}$ | 4.07  | 102 |
| GO:0043281 | regulation of cysteine-type endopeptidase activity involved in apoptotic process    | BP | $2.22 \times 10^{-8}$ | $2.14 \times 10^{-5}$ | 10.81 | 20  |
| GO:0002683 | negative regulation of immune system process                                        | BP | $2.45 \times 10^{-8}$ | $2.37 \times 10^{-5}$ | 9.13  | 24  |
| GO:0009891 | positive regulation of biosynthetic process                                         | BP | $3.02 \times 10^{-8}$ | $2.92 \times 10^{-5}$ | 4.77  | 68  |
| GO:0051240 | positive regulation of multicellular organismal process                             | BP | $3.31 \times 10^{-8}$ | $3.18 \times 10^{-5}$ | 5.52  | 50  |
| GO:0032446 | protein modification by small protein conjugation                                   | BP | $3.42 \times 10^{-8}$ | $3.29 \times 10^{-5}$ | 6.92  | 34  |
| GO:0043085 | positive regulation of catalytic activity                                           | BP | $3.45 \times 10^{-8}$ | $3.32 \times 10^{-5}$ | 5.70  | 47  |
| GO:0043901 | negative regulation of multi-organism process                                       | BP | $3.74 \times 10^{-8}$ | $3.59 \times 10^{-5}$ | 11.61 | 18  |
| GO:0045732 | positive regulation of protein catabolic process                                    | BP | $3.74 \times 10^{-8}$ | $3.59 \times 10^{-5}$ | 11.61 | 18  |
| GO:1903322 | positive regulation of protein modification by small protein conjugation or removal | BP | $3.85 \times 10^{-8}$ | $3.70 \times 10^{-5}$ | 13.11 | 16  |
| GO:0018108 | peptidyl-tyrosine phosphorylation                                                   | BP | $3.86 \times 10^{-8}$ | $3.70 \times 10^{-5}$ | 9.24  | 23  |
| GO:0035821 | modification of morphology or physiology of other                                   | BP | $4.14 \times 10^{-8}$ | $3.96 \times 10^{-5}$ | 11.54 | 18  |
| GO:2000058 | regulation of ubiquitin-dependent protein catabolic                                 | BP | $4.16 \times 10^{-8}$ | $3.97 \times 10^{-5}$ | 14.02 | 15  |
| GO:0035966 | response to topologically incorrect protein                                         | BP | $4.17 \times 10^{-8}$ | $3.99 \times 10^{-5}$ | 18.46 | 12  |
| GO:0009725 | response to hormone                                                                 | BP | $4.20 \times 10^{-8}$ | $4.00 \times 10^{-5}$ | 8.08  | 27  |
| GO:0043086 | negative regulation of catalytic activity                                           | BP | $5.07 \times 10^{-8}$ | $4.83 \times 10^{-5}$ | 6.81  | 34  |
| GO:0043491 | protein kinase B signaling                                                          | BP | $7.04 \times 10^{-8}$ | $6.70 \times 10^{-5}$ | 11.81 | 17  |
| GO:0009986 | cell surface                                                                        | CC | $8.33 \times 10^{-8}$ | $7.92 \times 10^{-5}$ | 6.80  | 33  |
| GO:0032101 | regulation of response to external stimulus                                         | BP | $8.49 \times 10^{-8}$ | $8.07 \times 10^{-5}$ | 7.25  | 30  |
| GO:1901698 | response to nitrogen compound                                                       | BP | $8.74 \times 10^{-8}$ | $8.30 \times 10^{-5}$ | 6.79  | 33  |
| GO:0019219 | regulation of nucleobase-containing compound metabolic process                      | BP | $9.85 \times 10^{-8}$ | $9.34 \times 10^{-5}$ | 4.02  | 97  |
| GO:1903364 | positive regulation of cellular protein catabolic process                           | BP | $1.06 \times 10^{-7}$ | $1.00 \times 10^{-4}$ | 14.14 | 14  |
| GO:0019955 | cytokine binding                                                                    | MF | $1.18 \times 10^{-7}$ | $1.11 \times 10^{-4}$ | 15.29 | 13  |
| GO:0008285 | negative regulation of cell proliferation                                           | BP | $1.19 \times 10^{-7}$ | $1.12 \times 10^{-4}$ | 7.30  | 29  |
| GO:0016567 | protein ubiquitination                                                              | BP | $1.24 \times 10^{-7}$ | $1.17 \times 10^{-4}$ | 6.97  | 31  |
| GO:1901214 | regulation of neuron death                                                          | BP | $1.36 \times 10^{-7}$ | $1.29 \times 10^{-4}$ | 13.86 | 14  |
| GO:0051050 | positive regulation of transport                                                    | BP | $1.38 \times 10^{-7}$ | $1.30 \times 10^{-4}$ | 6.21  | 37  |
| GO:2000379 | positive regulation of reactive oxygen species metabolic                            | BP | $1.39 \times 10^{-7}$ | $1.31 \times 10^{-4}$ | 18.64 | 11  |
| GO:0034976 | response to endoplasmic reticulum stress                                            | BP | $1.42 \times 10^{-7}$ | $1.34 \times 10^{-4}$ | 10.65 | 18  |
| GO:0010468 | regulation of gene expression                                                       | BP | $1.52 \times 10^{-7}$ | $1.42 \times 10^{-4}$ | 3.93  | 101 |
| GO:0008104 | protein localization                                                                | BP | $1.62 \times 10^{-7}$ | $1.52 \times 10^{-4}$ | 4.68  | 64  |
| GO:0016192 | vesicle-mediated transport                                                          | BP | $1.77 \times 10^{-7}$ | $1.65 \times 10^{-4}$ | 5.96  | 39  |

|            |                                                          |    |                       |                       |       |     |
|------------|----------------------------------------------------------|----|-----------------------|-----------------------|-------|-----|
| GO:0071345 | cellular response to cytokine stimulus                   | BP | $1.94 \times 10^{-7}$ | $1.82 \times 10^{-4}$ | 7.50  | 27  |
| GO:1904705 | regulation of vascular smooth muscle cell proliferation  | BP | $2.12 \times 10^{-7}$ | $1.98 \times 10^{-4}$ | 20.41 | 10  |
| GO:0019901 | protein kinase binding                                   | MF | $2.14 \times 10^{-7}$ | $1.99 \times 10^{-4}$ | 6.42  | 34  |
| GO:0010952 | positive regulation of peptidase activity                | BP | $2.28 \times 10^{-7}$ | $2.13 \times 10^{-4}$ | 10.90 | 17  |
| GO:0030336 | negative regulation of cell migration                    | BP | $2.31 \times 10^{-7}$ | $2.15 \times 10^{-4}$ | 9.01  | 21  |
| GO:0051707 | response to other organism                               | BP | $2.34 \times 10^{-7}$ | $2.17 \times 10^{-4}$ | 6.51  | 33  |
| GO:0009896 | positive regulation of catabolic process                 | BP | $2.44 \times 10^{-7}$ | $2.27 \times 10^{-4}$ | 7.84  | 25  |
| GO:0050730 | regulation of peptidyl-tyrosine phosphorylation          | BP | $2.63 \times 10^{-7}$ | $2.44 \times 10^{-4}$ | 9.74  | 19  |
| GO:0050778 | positive regulation of immune response                   | BP | $3.00 \times 10^{-7}$ | $2.79 \times 10^{-4}$ | 7.54  | 26  |
| GO:0031400 | negative regulation of protein modification process      | BP | $3.03 \times 10^{-7}$ | $2.81 \times 10^{-4}$ | 6.83  | 30  |
| GO:0008625 | extrinsic apoptotic signaling pathway via death domain   | BP | $3.31 \times 10^{-7}$ | $3.06 \times 10^{-4}$ | 17.19 | 11  |
| GO:0048731 | system development                                       | BP | $3.38 \times 10^{-7}$ | $3.13 \times 10^{-4}$ | 4.42  | 70  |
| GO:0040013 | negative regulation of locomotion                        | BP | $3.81 \times 10^{-7}$ | $3.52 \times 10^{-4}$ | 8.43  | 22  |
| GO:0045861 | negative regulation of proteolysis                       | BP | $3.90 \times 10^{-7}$ | $3.60 \times 10^{-4}$ | 9.50  | 19  |
| GO:1901216 | positive regulation of neuron death                      | BP | $3.94 \times 10^{-7}$ | $3.63 \times 10^{-4}$ | 26.67 | 8   |
| GO:0048545 | response to steroid hormone                              | BP | $3.94 \times 10^{-7}$ | $3.63 \times 10^{-4}$ | 10.49 | 17  |
| GO:0010557 | positive regulation of macromolecule biosynthetic        | BP | $4.31 \times 10^{-7}$ | $3.97 \times 10^{-4}$ | 4.59  | 63  |
| GO:0045597 | positive regulation of cell differentiation              | BP | $4.73 \times 10^{-7}$ | $4.35 \times 10^{-4}$ | 6.84  | 29  |
| GO:0070647 | protein modification by small protein conjugation or     | BP | $4.89 \times 10^{-7}$ | $4.49 \times 10^{-4}$ | 5.99  | 36  |
| GO:0043410 | positive regulation of MAPK cascade                      | BP | $4.93 \times 10^{-7}$ | $4.52 \times 10^{-4}$ | 7.34  | 26  |
| GO:0042177 | negative regulation of protein catabolic process         | BP | $5.62 \times 10^{-7}$ | $5.15 \times 10^{-4}$ | 12.39 | 14  |
| GO:0019838 | growth factor binding                                    | MF | $5.72 \times 10^{-7}$ | $5.23 \times 10^{-4}$ | 13.40 | 13  |
| GO:0050776 | regulation of immune response                            | BP | $5.74 \times 10^{-7}$ | $5.25 \times 10^{-4}$ | 6.78  | 29  |
| GO:1905897 | regulation of response to endoplasmic reticulum stress   | BP | $6.26 \times 10^{-7}$ | $5.71 \times 10^{-4}$ | 16.18 | 11  |
| GO:0097435 | supramolecular fiber organization                        | BP | $6.30 \times 10^{-7}$ | $5.75 \times 10^{-4}$ | 7.07  | 27  |
| GO:0009889 | regulation of biosynthetic process                       | BP | $7.46 \times 10^{-7}$ | $6.80 \times 10^{-4}$ | 3.90  | 94  |
| GO:0007167 | enzyme linked receptor protein signaling pathway         | BP | $7.73 \times 10^{-7}$ | $7.03 \times 10^{-4}$ | 6.29  | 32  |
| GO:0009888 | tissue development                                       | BP | $8.00 \times 10^{-7}$ | $7.27 \times 10^{-4}$ | 5.70  | 38  |
| GO:0033138 | positive regulation of peptidyl-serine phosphorylation   | BP | $9.18 \times 10^{-7}$ | $8.33 \times 10^{-4}$ | 12.87 | 13  |
| GO:0010628 | positive regulation of gene expression                   | BP | $9.18 \times 10^{-7}$ | $8.33 \times 10^{-4}$ | 4.43  | 65  |
| GO:0051098 | regulation of binding                                    | BP | $9.21 \times 10^{-7}$ | $8.35 \times 10^{-4}$ | 7.74  | 23  |
| GO:0031331 | positive regulation of cellular catabolic process        | BP | $9.27 \times 10^{-7}$ | $8.39 \times 10^{-4}$ | 8.00  | 22  |
| GO:0036462 | TRAIL-activated apoptotic signaling pathway              | BP | $9.31 \times 10^{-7}$ | $8.41 \times 10^{-4}$ | 55.56 | 5   |
| GO:0051252 | regulation of RNA metabolic process                      | BP | $9.41 \times 10^{-7}$ | $8.50 \times 10^{-4}$ | 3.98  | 87  |
| GO:0007249 | I-kappaB kinase/NF-kappaB signaling                      | BP | $9.61 \times 10^{-7}$ | $8.66 \times 10^{-4}$ | 9.38  | 18  |
| GO:0050731 | positive regulation of peptidyl-tyrosine phosphorylation | BP | $1.01 \times 10^{-6}$ | $9.11 \times 10^{-4}$ | 11.03 | 15  |
| GO:0007267 | cell-cell signaling                                      | BP | $1.02 \times 10^{-6}$ | $9.18 \times 10^{-4}$ | 6.45  | 30  |
| GO:0006996 | organelle organization                                   | BP | $1.04 \times 10^{-6}$ | $9.33 \times 10^{-4}$ | 3.97  | 87  |
| GO:0001704 | formation of primary germ layer                          | BP | $1.04 \times 10^{-6}$ | $9.34 \times 10^{-4}$ | 20.00 | 9   |
| GO:0032459 | regulation of protein oligomerization                    | BP | $1.04 \times 10^{-6}$ | $9.34 \times 10^{-4}$ | 20.00 | 9   |
| GO:0009895 | negative regulation of catabolic process                 | BP | $1.12 \times 10^{-6}$ | $1.00 \times 10^{-3}$ | 8.51  | 20  |
| GO:0035987 | endodermal cell differentiation                          | BP | $1.12 \times 10^{-6}$ | $1.01 \times 10^{-3}$ | 23.53 | 8   |
| GO:0019058 | viral life cycle                                         | BP | $1.18 \times 10^{-6}$ | $1.06 \times 10^{-3}$ | 8.84  | 19  |
| GO:0070371 | ERK1 and ERK2 cascade                                    | BP | $1.19 \times 10^{-6}$ | $1.07 \times 10^{-3}$ | 8.47  | 20  |
| GO:1990381 | ubiquitin-specific protease binding                      | MF | $1.24 \times 10^{-6}$ | $1.11 \times 10^{-3}$ | 37.50 | 6   |
| GO:0033043 | regulation of organelle organization                     | BP | $1.25 \times 10^{-6}$ | $1.11 \times 10^{-3}$ | 5.14  | 45  |
| GO:0051090 | regulation of DNA-binding transcription factor activity  | BP | $1.26 \times 10^{-6}$ | $1.13 \times 10^{-3}$ | 6.99  | 26  |
| GO:0032092 | positive regulation of protein binding                   | BP | $1.29 \times 10^{-6}$ | $1.15 \times 10^{-3}$ | 13.64 | 12  |
| GO:0010638 | positive regulation of organelle organization            | BP | $1.33 \times 10^{-6}$ | $1.18 \times 10^{-3}$ | 6.37  | 30  |
| GO:0010243 | response to organonitrogen compound                      | BP | $1.40 \times 10^{-6}$ | $1.24 \times 10^{-3}$ | 6.78  | 27  |
| GO:0051253 | negative regulation of RNA metabolic process             | BP | $1.45 \times 10^{-6}$ | $1.29 \times 10^{-3}$ | 5.11  | 45  |
| GO:1901576 | organic substance biosynthetic process                   | BP | $1.49 \times 10^{-6}$ | $1.32 \times 10^{-3}$ | 3.62  | 113 |
| GO:0031347 | regulation of defense response                           | BP | $1.52 \times 10^{-6}$ | $1.35 \times 10^{-3}$ | 7.10  | 25  |
| GO:0071705 | nitrogen compound transport                              | BP | $1.64 \times 10^{-6}$ | $1.45 \times 10^{-3}$ | 4.99  | 47  |
| GO:0071214 | cellular response to abiotic stimulus                    | BP | $1.67 \times 10^{-6}$ | $1.47 \times 10^{-3}$ | 8.64  | 19  |

|            |                                                                                              |    |                       |                       |       |     |
|------------|----------------------------------------------------------------------------------------------|----|-----------------------|-----------------------|-------|-----|
| GO:0022603 | regulation of anatomical structure morphogenesis                                             | BP | $1.69 \times 10^{-6}$ | $1.49 \times 10^{-3}$ | 6.18  | 31  |
| GO:0031326 | regulation of cellular biosynthetic process                                                  | BP | $1.71 \times 10^{-6}$ | $1.51 \times 10^{-3}$ | 3.85  | 92  |
| GO:0008630 | intrinsic apoptotic signaling pathway in response to DNA damage                              | BP | $1.72 \times 10^{-6}$ | $1.51 \times 10^{-3}$ | 14.67 | 11  |
| GO:0051219 | phosphoprotein binding                                                                       | MF | $1.72 \times 10^{-6}$ | $1.51 \times 10^{-3}$ | 14.67 | 11  |
| GO:0061136 | regulation of proteasomal protein catabolic process                                          | BP | $1.75 \times 10^{-6}$ | $1.54 \times 10^{-3}$ | 11.29 | 14  |
| GO:0060341 | regulation of cellular localization                                                          | BP | $1.78 \times 10^{-6}$ | $1.56 \times 10^{-3}$ | 6.05  | 32  |
| GO:0010466 | negative regulation of peptidase activity                                                    | BP | $1.79 \times 10^{-6}$ | $1.57 \times 10^{-3}$ | 12.15 | 13  |
| GO:0071702 | organic substance transport                                                                  | BP | $1.82 \times 10^{-6}$ | $1.60 \times 10^{-3}$ | 4.72  | 53  |
| GO:0031349 | positive regulation of defense response                                                      | BP | $1.91 \times 10^{-6}$ | $1.67 \times 10^{-3}$ | 8.56  | 19  |
| GO:0043903 | regulation of symbiosis. encompassing mutualism through parasitism                           | BP | $1.91 \times 10^{-6}$ | $1.67 \times 10^{-3}$ | 8.56  | 19  |
| GO:0051896 | regulation of protein kinase B signaling                                                     | BP | $1.93 \times 10^{-6}$ | $1.69 \times 10^{-3}$ | 11.20 | 14  |
| GO:0009059 | macromolecule biosynthetic process                                                           | BP | $1.93 \times 10^{-6}$ | $1.69 \times 10^{-3}$ | 3.73  | 101 |
| GO:0031330 | negative regulation of cellular catabolic process                                            | BP | $2.15 \times 10^{-6}$ | $1.88 \times 10^{-3}$ | 8.87  | 18  |
| GO:0034645 | cellular macromolecule biosynthetic process                                                  | BP | $2.15 \times 10^{-6}$ | $1.88 \times 10^{-3}$ | 3.74  | 99  |
| GO:0045934 | negative regulation of nucleobase-containing compound metabolic process                      | BP | $2.19 \times 10^{-6}$ | $1.91 \times 10^{-3}$ | 4.85  | 49  |
| GO:0010556 | regulation of macromolecule biosynthetic process                                             | BP | $2.32 \times 10^{-6}$ | $2.02 \times 10^{-3}$ | 3.85  | 90  |
| GO:0043393 | regulation of protein binding                                                                | BP | $2.36 \times 10^{-6}$ | $2.05 \times 10^{-3}$ | 9.24  | 17  |
| GO:0042493 | response to drug                                                                             | BP | $2.39 \times 10^{-6}$ | $2.07 \times 10^{-3}$ | 6.75  | 26  |
| GO:0005615 | extracellular space                                                                          | CC | $2.39 \times 10^{-6}$ | $2.07 \times 10^{-3}$ | 5.44  | 38  |
| GO:0051259 | protein complex oligomerization                                                              | BP | $2.57 \times 10^{-6}$ | $2.22 \times 10^{-3}$ | 6.57  | 27  |
| GO:0006935 | chemotaxis                                                                                   | BP | $2.74 \times 10^{-6}$ | $2.36 \times 10^{-3}$ | 7.75  | 21  |
| GO:0010035 | response to inorganic substance                                                              | BP | $2.74 \times 10^{-6}$ | $2.36 \times 10^{-3}$ | 7.75  | 21  |
| GO:0009890 | negative regulation of biosynthetic process                                                  | BP | $2.81 \times 10^{-6}$ | $2.43 \times 10^{-3}$ | 4.80  | 49  |
| GO:0051345 | positive regulation of hydrolase activity                                                    | BP | $2.95 \times 10^{-6}$ | $2.54 \times 10^{-3}$ | 6.52  | 27  |
| GO:2000112 | regulation of cellular macromolecule biosynthetic process                                    | BP | $2.98 \times 10^{-6}$ | $2.56 \times 10^{-3}$ | 3.86  | 88  |
| GO:0051254 | positive regulation of RNA metabolic process                                                 | BP | $3.00 \times 10^{-6}$ | $2.58 \times 10^{-3}$ | 4.50  | 57  |
| GO:0051817 | modification of morphology or physiology of other organism involved in symbiotic interaction | BP | $3.01 \times 10^{-6}$ | $2.59 \times 10^{-3}$ | 11.61 | 13  |
| GO:0007159 | leukocyte cell-cell adhesion                                                                 | BP | $3.05 \times 10^{-6}$ | $2.62 \times 10^{-3}$ | 8.65  | 18  |
| GO:0050900 | leukocyte migration                                                                          | BP | $3.05 \times 10^{-6}$ | $2.62 \times 10^{-3}$ | 8.65  | 18  |
| GO:0032870 | cellular response to hormone stimulus                                                        | BP | $3.14 \times 10^{-6}$ | $2.69 \times 10^{-3}$ | 7.43  | 22  |
| GO:0002761 | regulation of myeloid leukocyte differentiation                                              | BP | $3.27 \times 10^{-6}$ | $2.80 \times 10^{-3}$ | 15.38 | 10  |
| GO:0043112 | receptor metabolic process                                                                   | BP | $3.39 \times 10^{-6}$ | $2.90 \times 10^{-3}$ | 10.69 | 14  |
| GO:0048468 | cell development                                                                             | BP | $3.51 \times 10^{-6}$ | $2.99 \times 10^{-3}$ | 6.07  | 30  |
| GO:0010467 | gene expression                                                                              | BP | $3.66 \times 10^{-6}$ | $3.12 \times 10^{-3}$ | 3.59  | 109 |
| GO:2001243 | negative regulation of intrinsic apoptotic signaling                                         | BP | $3.74 \times 10^{-6}$ | $3.19 \times 10^{-3}$ | 13.58 | 11  |
| GO:0009636 | response to toxic substance                                                                  | BP | $4.13 \times 10^{-6}$ | $3.51 \times 10^{-3}$ | 9.87  | 15  |
| GO:0048525 | negative regulation of viral process                                                         | BP | $4.59 \times 10^{-6}$ | $3.90 \times 10^{-3}$ | 12.12 | 12  |
| GO:0097237 | cellular response to toxic substance                                                         | BP | $4.59 \times 10^{-6}$ | $3.90 \times 10^{-3}$ | 12.12 | 12  |
| GO:0034612 | response to tumor necrosis factor                                                            | BP | $4.61 \times 10^{-6}$ | $3.92 \times 10^{-3}$ | 9.25  | 16  |
| GO:0045893 | positive regulation of transcription. DNA-templated                                          | BP | $4.88 \times 10^{-6}$ | $4.14 \times 10^{-3}$ | 4.53  | 54  |
| GO:0071363 | cellular response to growth factor stimulus                                                  | BP | $5.02 \times 10^{-6}$ | $4.25 \times 10^{-3}$ | 6.48  | 26  |
| GO:0031398 | positive regulation of protein ubiquitination                                                | BP | $5.10 \times 10^{-6}$ | $4.31 \times 10^{-3}$ | 12.00 | 12  |
| GO:0051338 | regulation of transferase activity                                                           | BP | $5.10 \times 10^{-6}$ | $4.31 \times 10^{-3}$ | 5.41  | 36  |
| GO:0005737 | cytoplasm                                                                                    | CC | $5.20 \times 10^{-6}$ | $4.39 \times 10^{-3}$ | 3.02  | 205 |
| GO:0071216 | cellular response to biotic stimulus                                                         | BP | $5.28 \times 10^{-6}$ | $4.45 \times 10^{-3}$ | 10.29 | 14  |
| GO:0051347 | positive regulation of transferase activity                                                  | BP | $5.47 \times 10^{-6}$ | $4.61 \times 10^{-3}$ | 6.31  | 27  |
| GO:0006919 | activation of cysteine-type endopeptidase activity involved in apoptotic process             | BP | $5.71 \times 10^{-6}$ | $4.80 \times 10^{-3}$ | 14.49 | 10  |

|            |                                                                                                 |    |                       |                       |        |     |
|------------|-------------------------------------------------------------------------------------------------|----|-----------------------|-----------------------|--------|-----|
| GO:0051346 | negative regulation of hydrolase activity                                                       | BP | $5.94 \times 10^{-6}$ | $4.99 \times 10^{-3}$ | 7.63   | 20  |
| GO:0051897 | positive regulation of protein kinase B signaling                                               | BP | $6.04 \times 10^{-6}$ | $5.06 \times 10^{-3}$ | 12.94  | 11  |
| GO:0032103 | positive regulation of response to external stimulus                                            | BP | $6.20 \times 10^{-6}$ | $5.19 \times 10^{-3}$ | 9.04   | 16  |
| GO:0000151 | ubiquitin ligase complex                                                                        | CC | $6.30 \times 10^{-6}$ | $5.27 \times 10^{-3}$ | 8.22   | 18  |
| GO:0019221 | cytokine-mediated signaling pathway                                                             | BP | $6.38 \times 10^{-6}$ | $5.33 \times 10^{-3}$ | 8.59   | 17  |
| GO:0060627 | regulation of vesicle-mediated transport                                                        | BP | $6.79 \times 10^{-6}$ | $5.67 \times 10^{-3}$ | 7.85   | 19  |
| GO:0001817 | regulation of cytokine production                                                               | BP | $7.18 \times 10^{-6}$ | $5.99 \times 10^{-3}$ | 6.09   | 28  |
| GO:0002237 | response to molecule of bacterial origin                                                        | BP | $7.19 \times 10^{-6}$ | $5.99 \times 10^{-3}$ | 9.43   | 15  |
| GO:0050792 | regulation of viral process                                                                     | BP | $8.33 \times 10^{-6}$ | $6.93 \times 10^{-3}$ | 8.42   | 17  |
| GO:0044089 | positive regulation of cellular component biogenesis                                            | BP | $8.43 \times 10^{-6}$ | $7.00 \times 10^{-3}$ | 6.61   | 24  |
| GO:0034613 | cellular protein localization                                                                   | BP | $8.44 \times 10^{-6}$ | $7.01 \times 10^{-3}$ | 4.78   | 45  |
| GO:0002520 | immune system development                                                                       | BP | $8.56 \times 10^{-6}$ | $7.10 \times 10^{-3}$ | 6.78   | 23  |
| GO:0032989 | cellular component morphogenesis                                                                | BP | $8.56 \times 10^{-6}$ | $7.10 \times 10^{-3}$ | 6.78   | 23  |
| GO:0051241 | negative regulation of multicellular organismal process                                         | BP | $8.74 \times 10^{-6}$ | $7.24 \times 10^{-3}$ | 5.60   | 32  |
| GO:0045121 | membrane raft                                                                                   | CC | $8.90 \times 10^{-6}$ | $7.36 \times 10^{-3}$ | 8.37   | 17  |
| GO:0034599 | cellular response to oxidative stress                                                           | BP | $9.03 \times 10^{-6}$ | $7.46 \times 10^{-3}$ | 9.26   | 15  |
| GO:0008134 | transcription factor binding                                                                    | MF | $9.30 \times 10^{-6}$ | $7.67 \times 10^{-3}$ | 5.78   | 30  |
| GO:0002573 | myeloid leukocyte differentiation                                                               | BP | $9.38 \times 10^{-6}$ | $7.72 \times 10^{-3}$ | 11.32  | 12  |
| GO:0031327 | negative regulation of cellular biosynthetic process                                            | BP | $9.38 \times 10^{-6}$ | $7.73 \times 10^{-3}$ | 4.68   | 47  |
| GO:0002764 | immune response-regulating signaling pathway                                                    | BP | $9.50 \times 10^{-6}$ | $7.81 \times 10^{-3}$ | 8.33   | 17  |
| GO:0032102 | negative regulation of response to external stimulus                                            | BP | $9.73 \times 10^{-6}$ | $7.99 \times 10^{-3}$ | 9.20   | 15  |
| GO:0051099 | positive regulation of binding                                                                  | BP | $9.73 \times 10^{-6}$ | $7.99 \times 10^{-3}$ | 9.20   | 15  |
| GO:0010558 | negative regulation of macromolecule biosynthetic                                               | BP | $9.93 \times 10^{-6}$ | $8.14 \times 10^{-3}$ | 4.71   | 46  |
| GO:0045892 | negative regulation of transcription, DNA-templated                                             | BP | $1.00 \times 10^{-5}$ | $8.21 \times 10^{-3}$ | 5.00   | 40  |
| GO:0070374 | positive regulation of ERK1 and ERK2 cascade                                                    | BP | $1.03 \times 10^{-5}$ | $8.40 \times 10^{-3}$ | 9.72   | 14  |
| GO:2001141 | regulation of RNA biosynthetic process                                                          | BP | $1.09 \times 10^{-5}$ | $8.87 \times 10^{-3}$ | 3.88   | 78  |
| GO:0044388 | small protein activating enzyme binding                                                         | MF | $1.11 \times 10^{-5}$ | $9.03 \times 10^{-3}$ | 57.14  | 4   |
| GO:0034641 | cellular nitrogen compound metabolic process                                                    | BP | $1.11 \times 10^{-5}$ | $9.03 \times 10^{-3}$ | 3.42   | 120 |
| GO:0032880 | regulation of protein localization                                                              | BP | $1.12 \times 10^{-5}$ | $9.12 \times 10^{-3}$ | 5.30   | 35  |
| GO:0048015 | phosphatidylinositol-mediated signaling                                                         | BP | $1.14 \times 10^{-5}$ | $9.26 \times 10^{-3}$ | 11.11  | 12  |
| GO:1901699 | cellular response to nitrogen compound                                                          | BP | $1.19 \times 10^{-5}$ | $9.69 \times 10^{-3}$ | 6.65   | 23  |
| GO:0050839 | cell adhesion molecule binding                                                                  | MF | $1.20 \times 10^{-5}$ | $9.76 \times 10^{-3}$ | 9.59   | 14  |
| GO:0044249 | cellular biosynthetic process                                                                   | BP | $1.29 \times 10^{-5}$ | $1.05 \times 10^{-2}$ | 3.51   | 108 |
| GO:0034614 | cellular response to reactive oxygen species                                                    | BP | $1.31 \times 10^{-5}$ | $1.06 \times 10^{-2}$ | 11.96  | 11  |
| GO:0031264 | death-inducing signaling complex                                                                | CC | $1.34 \times 10^{-5}$ | $1.08 \times 10^{-2}$ | 35.71  | 5   |
| GO:0051788 | response to misfolded protein                                                                   | BP | $1.34 \times 10^{-5}$ | $1.08 \times 10^{-2}$ | 35.71  | 5   |
| GO:0006355 | regulation of transcription, DNA-templated                                                      | BP | $1.35 \times 10^{-5}$ | $1.09 \times 10^{-2}$ | 3.87   | 77  |
| GO:0032461 | positive regulation of protein oligomerization                                                  | BP | $1.36 \times 10^{-5}$ | $1.09 \times 10^{-2}$ | 26.09  | 6   |
| GO:0043549 | regulation of kinase activity                                                                   | BP | $1.39 \times 10^{-5}$ | $1.12 \times 10^{-2}$ | 5.57   | 31  |
| GO:0051051 | negative regulation of transport                                                                | BP | $1.39 \times 10^{-5}$ | $1.12 \times 10^{-2}$ | 6.98   | 21  |
| GO:0035877 | death effector domain binding                                                                   | MF | $1.40 \times 10^{-5}$ | $1.12 \times 10^{-2}$ | 100.00 | 3   |
| GO:0042886 | amide transport                                                                                 | BP | $1.42 \times 10^{-5}$ | $1.14 \times 10^{-2}$ | 4.93   | 40  |
| GO:0002253 | activation of immune response                                                                   | BP | $1.43 \times 10^{-5}$ | $1.15 \times 10^{-2}$ | 7.45   | 19  |
| GO:0060389 | pathway-restricted SMAD protein phosphorylation                                                 | BP | $1.48 \times 10^{-5}$ | $1.18 \times 10^{-2}$ | 17.02  | 8   |
| GO:0044271 | cellular nitrogen compound biosynthetic process                                                 | BP | $1.55 \times 10^{-5}$ | $1.24 \times 10^{-2}$ | 3.63   | 94  |
| GO:0090100 | positive regulation of transmembrane receptor protein serine/threonine kinase signaling pathway | BP | $1.66 \times 10^{-5}$ | $1.32 \times 10^{-2}$ | 14.52  | 9   |
| GO:2000117 | negative regulation of cysteine-type endopeptidase                                              | BP | $1.74 \times 10^{-5}$ | $1.39 \times 10^{-2}$ | 12.82  | 10  |
| GO:0031647 | regulation of protein stability                                                                 | BP | $1.78 \times 10^{-5}$ | $1.42 \times 10^{-2}$ | 7.34   | 19  |
| GO:0045637 | regulation of myeloid cell differentiation                                                      | BP | $1.85 \times 10^{-5}$ | $1.47 \times 10^{-2}$ | 9.85   | 13  |
| GO:0030097 | hemopoiesis                                                                                     | BP | $1.87 \times 10^{-5}$ | $1.49 \times 10^{-2}$ | 6.84   | 21  |
| GO:1903363 | negative regulation of cellular protein catabolic process                                       | BP | $1.95 \times 10^{-5}$ | $1.55 \times 10^{-2}$ | 12.66  | 10  |
| GO:1902105 | regulation of leukocyte differentiation                                                         | BP | $1.98 \times 10^{-5}$ | $1.57 \times 10^{-2}$ | 10.53  | 12  |

|            |                                                                                            |    |                       |                       |       |     |
|------------|--------------------------------------------------------------------------------------------|----|-----------------------|-----------------------|-------|-----|
| GO:0045859 | regulation of protein kinase activity                                                      | BP | $2.00 \times 10^{-5}$ | $1.58 \times 10^{-2}$ | 5.65  | 29  |
| GO:0090304 | nucleic acid metabolic process                                                             | BP | $2.02 \times 10^{-5}$ | $1.59 \times 10^{-2}$ | 3.52  | 103 |
| GO:0048661 | positive regulation of smooth muscle cell proliferation                                    | BP | $2.03 \times 10^{-5}$ | $1.61 \times 10^{-2}$ | 16.33 | 8   |
| GO:0043269 | regulation of ion transport                                                                | BP | $2.06 \times 10^{-5}$ | $1.63 \times 10^{-2}$ | 6.80  | 21  |
| GO:0010633 | negative regulation of epithelial cell migration                                           | BP | $2.18 \times 10^{-5}$ | $1.72 \times 10^{-2}$ | 12.50 | 10  |
| GO:0048646 | anatomical structure formation involved in morphogenesis                                   | BP | $2.19 \times 10^{-5}$ | $1.72 \times 10^{-2}$ | 5.96  | 26  |
| GO:1903827 | regulation of cellular protein localization                                                | BP | $2.25 \times 10^{-5}$ | $1.77 \times 10^{-2}$ | 6.39  | 23  |
| GO:0006914 | autophagy                                                                                  | BP | $2.27 \times 10^{-5}$ | $1.78 \times 10^{-2}$ | 6.97  | 20  |
| GO:0030522 | intracellular receptor signaling pathway                                                   | BP | $2.28 \times 10^{-5}$ | $1.78 \times 10^{-2}$ | 8.57  | 15  |
| GO:0006139 | nucleobase-containing compound metabolic process                                           | BP | $2.34 \times 10^{-5}$ | $1.83 \times 10^{-2}$ | 3.45  | 109 |
| GO:0035690 | cellular response to drug                                                                  | BP | $2.39 \times 10^{-5}$ | $1.87 \times 10^{-2}$ | 8.12  | 16  |
| GO:0045807 | positive regulation of endocytosis                                                         | BP | $2.44 \times 10^{-5}$ | $1.90 \times 10^{-2}$ | 12.35 | 10  |
| GO:1903052 | positive regulation of proteolysis involved in cellular protein catabolic process          | BP | $2.44 \times 10^{-5}$ | $1.90 \times 10^{-2}$ | 12.35 | 10  |
| GO:0030099 | myeloid cell differentiation                                                               | BP | $2.54 \times 10^{-5}$ | $1.98 \times 10^{-2}$ | 8.08  | 16  |
| GO:0043280 | positive regulation of cysteine-type endopeptidase activity involved in apoptotic process  | BP | $2.58 \times 10^{-5}$ | $2.00 \times 10^{-2}$ | 10.26 | 12  |
| GO:0051702 | interaction with symbiont                                                                  | BP | $2.64 \times 10^{-5}$ | $2.05 \times 10^{-2}$ | 11.11 | 11  |
| GO:0048729 | tissue morphogenesis                                                                       | BP | $2.74 \times 10^{-5}$ | $2.13 \times 10^{-2}$ | 8.92  | 14  |
| GO:0048598 | embryonic morphogenesis                                                                    | BP | $2.81 \times 10^{-5}$ | $2.18 \times 10^{-2}$ | 10.17 | 12  |
| GO:0045944 | positive regulation of transcription by RNA polymerase II                                  | BP | $2.93 \times 10^{-5}$ | $2.27 \times 10^{-2}$ | 4.72  | 41  |
| GO:0031334 | positive regulation of protein complex assembly                                            | BP | $2.97 \times 10^{-5}$ | $2.30 \times 10^{-2}$ | 8.38  | 15  |
| GO:0033627 | cell adhesion mediated by integrin                                                         | BP | $3.19 \times 10^{-5}$ | $2.46 \times 10^{-2}$ | 15.38 | 8   |
| GO:0022407 | regulation of cell-cell adhesion                                                           | BP | $3.23 \times 10^{-5}$ | $2.49 \times 10^{-2}$ | 7.29  | 18  |
| GO:0051272 | positive regulation of cellular component movement                                         | BP | $3.39 \times 10^{-5}$ | $2.61 \times 10^{-2}$ | 5.94  | 25  |
| GO:0015833 | peptide transport                                                                          | BP | $3.46 \times 10^{-5}$ | $2.66 \times 10^{-2}$ | 4.84  | 38  |
| GO:0071383 | cellular response to steroid hormone stimulus                                              | BP | $3.46 \times 10^{-5}$ | $2.66 \times 10^{-2}$ | 9.29  | 13  |
| GO:0045321 | leukocyte activation                                                                       | BP | $3.49 \times 10^{-5}$ | $2.68 \times 10^{-2}$ | 6.38  | 22  |
| GO:0002768 | immune response-regulating cell surface receptor signaling pathway                         | BP | $3.50 \times 10^{-5}$ | $2.68 \times 10^{-2}$ | 10.78 | 11  |
| GO:0001540 | amyloid-beta binding                                                                       | MF | $3.57 \times 10^{-5}$ | $2.73 \times 10^{-2}$ | 17.95 | 7   |
| GO:0097718 | disordered domain specific binding                                                         | MF | $3.57 \times 10^{-5}$ | $2.73 \times 10^{-2}$ | 17.95 | 7   |
| GO:1902930 | regulation of alcohol biosynthetic process                                                 | BP | $3.67 \times 10^{-5}$ | $2.80 \times 10^{-2}$ | 22.22 | 6   |
| GO:0006979 | response to oxidative stress                                                               | BP | $3.79 \times 10^{-5}$ | $2.89 \times 10^{-2}$ | 7.49  | 17  |
| GO:0048156 | tau protein binding                                                                        | MF | $3.83 \times 10^{-5}$ | $2.92 \times 10^{-2}$ | 44.44 | 4   |
| GO:0045087 | innate immune response                                                                     | BP | $3.92 \times 10^{-5}$ | $2.98 \times 10^{-2}$ | 6.17  | 23  |
| GO:0017038 | protein import                                                                             | BP | $3.92 \times 10^{-5}$ | $2.98 \times 10^{-2}$ | 9.84  | 12  |
| GO:0050865 | regulation of cell activation                                                              | BP | $4.08 \times 10^{-5}$ | $3.10 \times 10^{-2}$ | 6.91  | 19  |
| GO:0070555 | response to interleukin-1                                                                  | BP | $4.13 \times 10^{-5}$ | $3.13 \times 10^{-2}$ | 11.63 | 10  |
| GO:0007169 | transmembrane receptor protein tyrosine kinase signaling pathway                           | BP | $4.15 \times 10^{-5}$ | $3.14 \times 10^{-2}$ | 6.48  | 21  |
| GO:1903829 | positive regulation of cellular protein localization                                       | BP | $4.37 \times 10^{-5}$ | $3.31 \times 10^{-2}$ | 7.73  | 16  |
| GO:1901362 | organic cyclic compound biosynthetic process                                               | BP | $4.40 \times 10^{-5}$ | $3.32 \times 10^{-2}$ | 3.63  | 86  |
| GO:0051260 | protein homooligomerization                                                                | BP | $4.44 \times 10^{-5}$ | $3.34 \times 10^{-2}$ | 7.11  | 18  |
| GO:0009617 | response to bacterium                                                                      | BP | $4.47 \times 10^{-5}$ | $3.36 \times 10^{-2}$ | 6.64  | 20  |
| GO:0051091 | positive regulation of DNA-binding transcription factor                                    | BP | $4.48 \times 10^{-5}$ | $3.37 \times 10^{-2}$ | 7.39  | 17  |
| GO:0003705 | transcription factor activity. RNA polymerase II distal enhancer sequence-specific binding | MF | $4.58 \times 10^{-5}$ | $3.44 \times 10^{-2}$ | 21.43 | 6   |
| GO:0043123 | positive regulation of I-kappaB kinase/NF-kappaB                                           | BP | $4.60 \times 10^{-5}$ | $3.45 \times 10^{-2}$ | 9.68  | 12  |
| GO:0030100 | regulation of endocytosis                                                                  | BP | $4.66 \times 10^{-5}$ | $3.49 \times 10^{-2}$ | 9.03  | 13  |
| GO:0099513 | polymeric cytoskeletal fiber                                                               | CC | $4.73 \times 10^{-5}$ | $3.54 \times 10^{-2}$ | 6.83  | 19  |
| GO:0007010 | cytoskeleton organization                                                                  | BP | $4.88 \times 10^{-5}$ | $3.64 \times 10^{-2}$ | 4.82  | 37  |
| GO:0016070 | RNA metabolic process                                                                      | BP | $4.89 \times 10^{-5}$ | $3.65 \times 10^{-2}$ | 3.56  | 91  |

|            |                                                                              |    |                       |                       |       |    |
|------------|------------------------------------------------------------------------------|----|-----------------------|-----------------------|-------|----|
| GO:1902903 | regulation of supramolecular fiber organization                              | BP | $4.99 \times 10^{-5}$ | $3.72 \times 10^{-2}$ | 7.33  | 17 |
| GO:0051402 | neuron apoptotic process                                                     | BP | $5.03 \times 10^{-5}$ | $3.75 \times 10^{-2}$ | 12.68 | 9  |
| GO:2001237 | negative regulation of extrinsic apoptotic signaling                         | BP | $5.03 \times 10^{-5}$ | $3.75 \times 10^{-2}$ | 12.68 | 9  |
| GO:0033674 | positive regulation of kinase activity                                       | BP | $5.14 \times 10^{-5}$ | $3.82 \times 10^{-2}$ | 6.21  | 22 |
| GO:0070513 | death domain binding                                                         | MF | $5.29 \times 10^{-5}$ | $3.92 \times 10^{-2}$ | 27.78 | 5  |
| GO:0051701 | interaction with host                                                        | BP | $5.39 \times 10^{-5}$ | $4.00 \times 10^{-2}$ | 9.52  | 12 |
| GO:0030335 | positive regulation of cell migration                                        | BP | $5.44 \times 10^{-5}$ | $4.02 \times 10^{-2}$ | 5.90  | 24 |
| GO:0071248 | cellular response to metal ion                                               | BP | $5.46 \times 10^{-5}$ | $4.04 \times 10^{-2}$ | 10.28 | 11 |
| GO:0071316 | cellular response to nicotine                                                | BP | $5.49 \times 10^{-5}$ | $4.05 \times 10^{-2}$ | 75.00 | 3  |
| GO:0097199 | cysteine-type endopeptidase activity involved in apoptotic signaling pathway | MF | $5.49 \times 10^{-5}$ | $4.05 \times 10^{-2}$ | 75.00 | 3  |
| GO:1990452 | Parkin-FBXW7-Cul1 ubiquitin ligase complex                                   | CC | $5.49 \times 10^{-5}$ | $4.05 \times 10^{-2}$ | 75.00 | 3  |
| GO:2000152 | regulation of ubiquitin-specific protease activity                           | BP | $5.49 \times 10^{-5}$ | $4.05 \times 10^{-2}$ | 75.00 | 3  |
| GO:0006366 | transcription by RNA polymerase II                                           | BP | $5.57 \times 10^{-5}$ | $4.10 \times 10^{-2}$ | 4.10  | 56 |
| GO:0018130 | heterocycle biosynthetic process                                             | BP | $5.59 \times 10^{-5}$ | $4.11 \times 10^{-2}$ | 3.63  | 84 |
| GO:0005874 | microtubule                                                                  | CC | $5.59 \times 10^{-5}$ | $4.11 \times 10^{-2}$ | 7.94  | 15 |
| GO:0019956 | chemokine binding                                                            | MF | $5.65 \times 10^{-5}$ | $4.15 \times 10^{-2}$ | 20.69 | 6  |
| GO:1903706 | regulation of hemopoiesis                                                    | BP | $5.94 \times 10^{-5}$ | $4.35 \times 10^{-2}$ | 7.89  | 15 |
| GO:0030518 | intracellular steroid hormone receptor signaling pathway                     | BP | $5.95 \times 10^{-5}$ | $4.36 \times 10^{-2}$ | 10.19 | 11 |
| GO:0007569 | cell aging                                                                   | BP | $6.13 \times 10^{-5}$ | $4.48 \times 10^{-2}$ | 11.11 | 10 |
| GO:0042995 | cell projection                                                              | CC | $6.27 \times 10^{-5}$ | $4.57 \times 10^{-2}$ | 5.00  | 33 |
| GO:0048025 | negative regulation of mRNA splicing, via spliceosome                        | BP | $6.27 \times 10^{-5}$ | $4.58 \times 10^{-2}$ | 40.00 | 4  |
| GO:0009755 | hormone-mediated signaling pathway                                           | BP | $6.29 \times 10^{-5}$ | $4.58 \times 10^{-2}$ | 9.38  | 12 |
| GO:0032182 | ubiquitin-like protein binding                                               | MF | $6.30 \times 10^{-5}$ | $4.58 \times 10^{-2}$ | 14.04 | 8  |
| GO:0045184 | establishment of protein localization                                        | BP | $6.87 \times 10^{-5}$ | $4.99 \times 10^{-2}$ | 4.59  | 40 |

MF (molecular function), BP (biological process), CC (cellular component)



**Supplementary Table S11.** GO analysis of the extended interactome of integrated colon markers linked to the long-term anti-TNF response in CD patients.

| GO ID      | GO term                                              | ontology<br>source | p-value                | adjusted p-<br>value   | % assoc.<br>genes | nr. assoc.<br>genes |
|------------|------------------------------------------------------|--------------------|------------------------|------------------------|-------------------|---------------------|
| GO:0000151 | ubiquitin ligase complex                             | CC                 | $1.65 \times 10^{-11}$ | $8.27 \times 10^{-11}$ | 5.02              | 11                  |
| GO:0031461 | cullin-RING ubiquitin ligase complex                 | CC                 | $3.56 \times 10^{-9}$  | $1.42 \times 10^{-8}$  | 5.93              | 8                   |
| GO:0009416 | response to light stimulus                           | BP                 | $8.62 \times 10^{-5}$  | $2.59 \times 10^{-4}$  | 3.13              | 5                   |
| GO:0035967 | cellular response to topologically incorrect protein | BP                 | $5.34 \times 10^{-4}$  | $1.07 \times 10^{-3}$  | 5.36              | 3                   |
| GO:0034644 | cellular response to UV                              | BP                 | $1.74 \times 10^{-3}$  | $1.74 \times 10^{-3}$  | 3.57              | 3                   |
| GO:0050709 | negative regulation of protein secretion             | BP                 | $1.74 \times 10^{-3}$  | $1.74 \times 10^{-3}$  | 3.57              | 3                   |

BP (biological process), CC (cellular component)

**Supplementary Table S12.** GO analysis of the extended interactome of integrated blood markers linked to the short-term anti-TNF response in CD patients.

| GO ID      | GO term                                                                    | ontology<br>source | p-value                | adjusted p-<br>value   | % assoc.<br>genes | nr. assoc.<br>genes |
|------------|----------------------------------------------------------------------------|--------------------|------------------------|------------------------|-------------------|---------------------|
| GO:0035556 | intracellular signal transduction                                          | BP                 | $2.50 \times 10^{-24}$ | $1.31 \times 10^{-21}$ | 4.41              | 70                  |
| GO:0007165 | signal transduction                                                        | BP                 | $6.14 \times 10^{-24}$ | $3.23 \times 10^{-21}$ | 3.35              | 90                  |
| GO:0044267 | cellular protein metabolic process                                         | BP                 | $1.31 \times 10^{-21}$ | $6.87 \times 10^{-19}$ | 3.05              | 92                  |
| GO:0070887 | cellular response to chemical stimulus                                     | BP                 | $1.93 \times 10^{-21}$ | $1.01 \times 10^{-18}$ | 4.05              | 68                  |
| GO:1902531 | regulation of intracellular signal transduction                            | BP                 | $2.09 \times 10^{-21}$ | $1.09 \times 10^{-18}$ | 4.87              | 57                  |
| GO:0010033 | response to organic substance                                              | BP                 | $1.70 \times 10^{-20}$ | $8.85 \times 10^{-18}$ | 4.13              | 64                  |
| GO:0006464 | cellular protein modification process                                      | BP                 | $1.71 \times 10^{-20}$ | $8.88 \times 10^{-18}$ | 3.30              | 81                  |
| GO:0048583 | regulation of response to stimulus                                         | BP                 | $5.40 \times 10^{-20}$ | $2.80 \times 10^{-17}$ | 3.35              | 78                  |
| GO:0010646 | regulation of cell communication                                           | BP                 | $5.79 \times 10^{-20}$ | $3.00 \times 10^{-17}$ | 3.70              | 70                  |
| GO:0023051 | regulation of signaling                                                    | BP                 | $1.05 \times 10^{-19}$ | $5.42 \times 10^{-17}$ | 3.66              | 70                  |
| GO:0071310 | cellular response to organic substance                                     | BP                 | $1.35 \times 10^{-19}$ | $6.94 \times 10^{-17}$ | 4.46              | 57                  |
| GO:0048584 | positive regulation of response to stimulus                                | BP                 | $2.61 \times 10^{-19}$ | $1.35 \times 10^{-16}$ | 4.25              | 59                  |
| GO:0019899 | enzyme binding                                                             | MF                 | $5.09 \times 10^{-19}$ | $2.62 \times 10^{-16}$ | 3.76              | 66                  |
| GO:0009967 | positive regulation of signal transduction                                 | BP                 | $6.63 \times 10^{-19}$ | $3.40 \times 10^{-16}$ | 4.95              | 50                  |
| GO:0031399 | regulation of protein modification process                                 | BP                 | $1.11 \times 10^{-18}$ | $5.70 \times 10^{-16}$ | 4.34              | 56                  |
| GO:0051246 | regulation of protein metabolic process                                    | BP                 | $2.94 \times 10^{-18}$ | $1.50 \times 10^{-15}$ | 3.59              | 67                  |
| GO:0044389 | ubiquitin-like protein ligase binding                                      | MF                 | $5.89 \times 10^{-18}$ | $3.01 \times 10^{-15}$ | 9.18              | 29                  |
| GO:0032268 | regulation of cellular protein metabolic process                           | BP                 | $9.77 \times 10^{-18}$ | $4.97 \times 10^{-15}$ | 3.66              | 64                  |
| GO:1902533 | positive regulation of intracellular signal transduction                   | BP                 | $1.76 \times 10^{-17}$ | $8.93 \times 10^{-15}$ | 5.66              | 41                  |
| GO:0007166 | cell surface receptor signaling pathway                                    | BP                 | $5.52 \times 10^{-16}$ | $2.80 \times 10^{-13}$ | 4.05              | 52                  |
| GO:0007249 | I-kappaB kinase/NF-kappaB signaling                                        | BP                 | $7.57 \times 10^{-16}$ | $3.83 \times 10^{-13}$ | 11.46             | 22                  |
| GO:0044093 | positive regulation of molecular function                                  | BP                 | $1.40 \times 10^{-15}$ | $7.06 \times 10^{-13}$ | 4.27              | 48                  |
| GO:0097190 | apoptotic signaling pathway                                                | BP                 | $2.37 \times 10^{-15}$ | $1.20 \times 10^{-12}$ | 7.03              | 30                  |
| GO:0051247 | positive regulation of protein metabolic process                           | BP                 | $6.57 \times 10^{-15}$ | $3.31 \times 10^{-12}$ | 4.03              | 49                  |
| GO:0031401 | positive regulation of protein modification process                        | BP                 | $2.15 \times 10^{-14}$ | $1.08 \times 10^{-11}$ | 4.61              | 41                  |
| GO:0051091 | positive regulation of DNA-binding transcription factor activity           | BP                 | $3.41 \times 10^{-14}$ | $1.71 \times 10^{-11}$ | 9.57              | 22                  |
| GO:0051252 | regulation of RNA metabolic process                                        | BP                 | $3.93 \times 10^{-14}$ | $1.96 \times 10^{-11}$ | 3.02              | 66                  |
| GO:0097191 | extrinsic apoptotic signaling pathway                                      | BP                 | $6.49 \times 10^{-14}$ | $3.24 \times 10^{-11}$ | 11.59             | 19                  |
| GO:0006468 | protein phosphorylation                                                    | BP                 | $7.71 \times 10^{-14}$ | $3.84 \times 10^{-11}$ | 3.78              | 49                  |
| GO:2001141 | regulation of RNA biosynthetic process                                     | BP                 | $1.38 \times 10^{-13}$ | $6.83 \times 10^{-11}$ | 3.08              | 62                  |
| GO:0006915 | apoptotic process                                                          | BP                 | $1.37 \times 10^{-13}$ | $6.83 \times 10^{-11}$ | 4.01              | 45                  |
| GO:0016310 | phosphorylation                                                            | BP                 | $1.94 \times 10^{-13}$ | $9.61 \times 10^{-11}$ | 3.57              | 51                  |
| GO:0051090 | regulation of DNA-binding transcription factor activity                    | BP                 | $2.38 \times 10^{-13}$ | $1.17 \times 10^{-10}$ | 6.99              | 26                  |
| GO:0006355 | regulation of transcription, DNA-templated                                 | BP                 | $3.04 \times 10^{-13}$ | $1.50 \times 10^{-10}$ | 3.07              | 61                  |
| GO:0042325 | regulation of phosphorylation                                              | BP                 | $7.84 \times 10^{-13}$ | $3.86 \times 10^{-10}$ | 3.97              | 43                  |
| GO:1903320 | regulation of protein modification by small protein conjugation or removal | BP                 | $1.67 \times 10^{-12}$ | $8.19 \times 10^{-10}$ | 9.69              | 19                  |
| GO:0030163 | protein catabolic process                                                  | BP                 | $1.89 \times 10^{-12}$ | $9.28 \times 10^{-10}$ | 5.44              | 30                  |
| GO:0019220 | regulation of phosphate metabolic process                                  | BP                 | $3.15 \times 10^{-12}$ | $1.54 \times 10^{-9}$  | 3.66              | 45                  |
| GO:0019900 | kinase binding                                                             | MF                 | $3.15 \times 10^{-12}$ | $1.54 \times 10^{-9}$  | 5.16              | 31                  |
| GO:0001934 | positive regulation of protein phosphorylation                             | BP                 | $5.84 \times 10^{-12}$ | $2.84 \times 10^{-9}$  | 4.73              | 33                  |
| GO:0034097 | response to cytokine                                                       | BP                 | $5.90 \times 10^{-12}$ | $2.87 \times 10^{-9}$  | 6.07              | 26                  |
| GO:1901565 | organonitrogen compound catabolic process                                  | BP                 | $1.12 \times 10^{-11}$ | $5.42 \times 10^{-9}$  | 4.62              | 33                  |

|            |                                                                                     |    |                        |                       |       |    |
|------------|-------------------------------------------------------------------------------------|----|------------------------|-----------------------|-------|----|
| GO:0042176 | regulation of protein catabolic process                                             | BP | $1.16 \times 10^{-11}$ | $5.60 \times 10^{-9}$ | 7.61  | 21 |
| GO:0009057 | macromolecule catabolic process                                                     | BP | $1.36 \times 10^{-11}$ | $6.56 \times 10^{-9}$ | 4.46  | 34 |
| GO:0031396 | regulation of protein ubiquitination                                                | BP | $1.60 \times 10^{-11}$ | $7.69 \times 10^{-9}$ | 10.00 | 17 |
| GO:0019904 | protein domain specific binding                                                     | MF | $1.80 \times 10^{-11}$ | $8.67 \times 10^{-9}$ | 5.15  | 29 |
| GO:0030162 | regulation of proteolysis                                                           | BP | $1.93 \times 10^{-11}$ | $9.25 \times 10^{-9}$ | 5.53  | 27 |
| GO:0032446 | protein modification by small protein conjugation                                   | BP | $2.22 \times 10^{-11}$ | $1.06 \times 10^{-8}$ | 5.50  | 27 |
| GO:0071495 | cellular response to endogenous stimulus                                            | BP | $4.81 \times 10^{-11}$ | $2.30 \times 10^{-8}$ | 4.50  | 32 |
| GO:0033554 | cellular response to stress                                                         | BP | $6.06 \times 10^{-11}$ | $2.89 \times 10^{-8}$ | 3.42  | 44 |
| GO:0051092 | positive regulation of NF-kappaB transcription factor                               | BP | $7.99 \times 10^{-11}$ | $3.80 \times 10^{-8}$ | 10.87 | 15 |
| GO:0016567 | protein ubiquitination                                                              | BP | $8.43 \times 10^{-11}$ | $4.00 \times 10^{-8}$ | 5.62  | 25 |
| GO:0070647 | protein modification by small protein conjugation or                                | BP | $8.64 \times 10^{-11}$ | $4.10 \times 10^{-8}$ | 4.83  | 29 |
| GO:2001233 | regulation of apoptotic signaling pathway                                           | BP | $2.59 \times 10^{-10}$ | $1.22 \times 10^{-7}$ | 6.83  | 20 |
| GO:0051172 | negative regulation of nitrogen compound metabolic                                  | BP | $2.98 \times 10^{-10}$ | $1.41 \times 10^{-7}$ | 3.06  | 48 |
| GO:0006508 | proteolysis                                                                         | BP | $3.07 \times 10^{-10}$ | $1.45 \times 10^{-7}$ | 3.71  | 37 |
| GO:0042981 | regulation of apoptotic process                                                     | BP | $3.47 \times 10^{-10}$ | $1.63 \times 10^{-7}$ | 3.77  | 36 |
| GO:2000058 | regulation of ubiquitin-dependent protein catabolic                                 | BP | $3.76 \times 10^{-10}$ | $1.77 \times 10^{-7}$ | 12.15 | 13 |
| GO:0044257 | cellular protein catabolic process                                                  | BP | $6.55 \times 10^{-10}$ | $3.07 \times 10^{-7}$ | 5.31  | 24 |
| GO:1903362 | regulation of cellular protein catabolic process                                    | BP | $6.72 \times 10^{-10}$ | $3.14 \times 10^{-7}$ | 8.56  | 16 |
| GO:0010941 | regulation of cell death                                                            | BP | $7.08 \times 10^{-10}$ | $3.30 \times 10^{-7}$ | 3.53  | 38 |
| GO:0051338 | regulation of transferase activity                                                  | BP | $9.26 \times 10^{-10}$ | $4.30 \times 10^{-7}$ | 4.36  | 29 |
| GO:0006511 | ubiquitin-dependent protein catabolic process                                       | BP | $9.25 \times 10^{-10}$ | $4.30 \times 10^{-7}$ | 6.35  | 20 |
| GO:0071214 | cellular response to abiotic stimulus                                               | BP | $9.33 \times 10^{-10}$ | $4.32 \times 10^{-7}$ | 7.73  | 17 |
| GO:0032182 | ubiquitin-like protein binding                                                      | MF | $1.08 \times 10^{-9}$  | $4.97 \times 10^{-7}$ | 17.54 | 10 |
| GO:0050790 | regulation of catalytic activity                                                    | BP | $1.09 \times 10^{-9}$  | $5.03 \times 10^{-7}$ | 3.23  | 42 |
| GO:2001236 | regulation of extrinsic apoptotic signaling pathway                                 | BP | $1.29 \times 10^{-9}$  | $5.95 \times 10^{-7}$ | 11.02 | 13 |
| GO:2001238 | positive regulation of extrinsic apoptotic signaling                                | BP | $1.44 \times 10^{-9}$  | $6.59 \times 10^{-7}$ | 20.93 | 9  |
| GO:0051603 | proteolysis involved in cellular protein catabolic process                          | BP | $1.71 \times 10^{-9}$  | $7.85 \times 10^{-7}$ | 5.53  | 22 |
| GO:0014070 | response to organic cyclic compound                                                 | BP | $1.80 \times 10^{-9}$  | $8.21 \times 10^{-7}$ | 5.51  | 22 |
| GO:0043085 | positive regulation of catalytic activity                                           | BP | $2.04 \times 10^{-9}$  | $9.29 \times 10^{-7}$ | 3.88  | 32 |
| GO:0010498 | proteasomal protein catabolic process                                               | BP | $2.19 \times 10^{-9}$  | $9.97 \times 10^{-7}$ | 6.82  | 18 |
| GO:0071260 | cellular response to mechanical stimulus                                            | BP | $3.33 \times 10^{-9}$  | $1.51 \times 10^{-6}$ | 19.15 | 9  |
| GO:0005102 | signaling receptor binding                                                          | MF | $3.48 \times 10^{-9}$  | $1.58 \times 10^{-6}$ | 3.46  | 36 |
| GO:1901575 | organic substance catabolic process                                                 | BP | $3.87 \times 10^{-9}$  | $1.75 \times 10^{-6}$ | 3.38  | 37 |
| GO:0071496 | cellular response to external stimulus                                              | BP | $4.25 \times 10^{-9}$  | $1.92 \times 10^{-6}$ | 8.20  | 15 |
| GO:0030154 | cell differentiation                                                                | BP | $5.03 \times 10^{-9}$  | $2.26 \times 10^{-6}$ | 3.17  | 40 |
| GO:0018193 | peptidyl-amino acid modification                                                    | BP | $5.38 \times 10^{-9}$  | $2.41 \times 10^{-6}$ | 3.82  | 31 |
| GO:0000151 | ubiquitin ligase complex                                                            | CC | $6.70 \times 10^{-9}$  | $3.00 \times 10^{-6}$ | 7.31  | 16 |
| GO:0009894 | regulation of catabolic process                                                     | BP | $9.04 \times 10^{-9}$  | $4.04 \times 10^{-6}$ | 4.33  | 26 |
| GO:0071345 | cellular response to cytokine stimulus                                              | BP | $9.17 \times 10^{-9}$  | $4.09 \times 10^{-6}$ | 5.56  | 20 |
| GO:0080135 | regulation of cellular response to stress                                           | BP | $1.04 \times 10^{-8}$  | $4.63 \times 10^{-6}$ | 4.62  | 24 |
| GO:0019901 | protein kinase binding                                                              | MF | $1.50 \times 10^{-8}$  | $6.67 \times 10^{-6}$ | 4.53  | 24 |
| GO:1903322 | positive regulation of protein modification by small protein conjugation or removal | BP | $2.09 \times 10^{-8}$  | $9.25 \times 10^{-6}$ | 9.84  | 12 |
| GO:0080134 | regulation of response to stress                                                    | BP | $2.28 \times 10^{-8}$  | $1.01 \times 10^{-5}$ | 3.51  | 32 |
| GO:0098589 | membrane region                                                                     | CC | $2.42 \times 10^{-8}$  | $1.07 \times 10^{-5}$ | 7.21  | 15 |
| GO:0036462 | TRAIL-activated apoptotic signaling pathway                                         | BP | $2.62 \times 10^{-8}$  | $1.15 \times 10^{-5}$ | 55.56 | 5  |
| GO:0000165 | MAPK cascade                                                                        | BP | $2.75 \times 10^{-8}$  | $1.21 \times 10^{-5}$ | 4.39  | 24 |
| GO:0051347 | positive regulation of transferase activity                                         | BP | $3.32 \times 10^{-8}$  | $1.46 \times 10^{-5}$ | 4.91  | 21 |
| GO:0044248 | cellular catabolic process                                                          | BP | $3.93 \times 10^{-8}$  | $1.72 \times 10^{-5}$ | 3.04  | 38 |

|            |                                                                         |    |                       |                       |       |    |
|------------|-------------------------------------------------------------------------|----|-----------------------|-----------------------|-------|----|
| GO:0044265 | cellular macromolecule catabolic process                                | BP | $4.04 \times 10^{-8}$ | $1.76 \times 10^{-5}$ | 4.02  | 26 |
| GO:0018108 | peptidyl-tyrosine phosphorylation                                       | BP | $4.13 \times 10^{-8}$ | $1.80 \times 10^{-5}$ | 6.43  | 16 |
| GO:0097193 | intrinsic apoptotic signaling pathway                                   | BP | $4.53 \times 10^{-8}$ | $1.97 \times 10^{-5}$ | 6.88  | 15 |
| GO:0034599 | cellular response to oxidative stress                                   | BP | $6.15 \times 10^{-8}$ | $2.66 \times 10^{-5}$ | 8.02  | 13 |
| GO:1901698 | response to nitrogen compound                                           | BP | $6.38 \times 10^{-8}$ | $2.76 \times 10^{-5}$ | 4.53  | 22 |
| GO:0031329 | regulation of cellular catabolic process                                | BP | $6.50 \times 10^{-8}$ | $2.80 \times 10^{-5}$ | 4.35  | 23 |
| GO:0071236 | cellular response to antibiotic                                         | BP | $7.36 \times 10^{-8}$ | $3.16 \times 10^{-5}$ | 11.49 | 10 |
| GO:0033993 | response to lipid                                                       | BP | $8.28 \times 10^{-8}$ | $3.55 \times 10^{-5}$ | 4.87  | 20 |
| GO:0048468 | cell development                                                        | BP | $8.50 \times 10^{-8}$ | $3.64 \times 10^{-5}$ | 4.45  | 22 |
| GO:1990234 | transferase complex                                                     | CC | $8.57 \times 10^{-8}$ | $3.66 \times 10^{-5}$ | 3.99  | 25 |
| GO:0034976 | response to endoplasmic reticulum stress                                | BP | $1.01 \times 10^{-7}$ | $4.32 \times 10^{-5}$ | 7.69  | 13 |
| GO:0045121 | membrane raft                                                           | CC | $1.26 \times 10^{-7}$ | $5.36 \times 10^{-5}$ | 6.90  | 14 |
| GO:0051707 | response to other organism                                              | BP | $1.34 \times 10^{-7}$ | $5.66 \times 10^{-5}$ | 4.34  | 22 |
| GO:0010942 | positive regulation of cell death                                       | BP | $1.62 \times 10^{-7}$ | $6.87 \times 10^{-5}$ | 4.47  | 21 |
| GO:0043549 | regulation of kinase activity                                           | BP | $1.65 \times 10^{-7}$ | $6.95 \times 10^{-5}$ | 4.13  | 23 |
| GO:0070997 | neuron death                                                            | BP | $2.20 \times 10^{-7}$ | $9.27 \times 10^{-5}$ | 8.94  | 11 |
| GO:2001235 | positive regulation of apoptotic signaling pathway                      | BP | $2.20 \times 10^{-7}$ | $9.27 \times 10^{-5}$ | 8.94  | 11 |
| GO:0043066 | negative regulation of apoptotic process                                | BP | $2.36 \times 10^{-7}$ | $9.91 \times 10^{-5}$ | 4.20  | 22 |
| GO:0061136 | regulation of proteasomal protein catabolic process                     | BP | $2.39 \times 10^{-7}$ | $1.00 \times 10^{-4}$ | 8.87  | 11 |
| GO:0071797 | LUBAC complex                                                           | CC | $2.76 \times 10^{-7}$ | $1.15 \times 10^{-4}$ | 66.67 | 4  |
| GO:0031398 | positive regulation of protein ubiquitination                           | BP | $2.79 \times 10^{-7}$ | $1.16 \times 10^{-4}$ | 10.00 | 10 |
| GO:0044087 | regulation of cellular component biogenesis                             | BP | $2.86 \times 10^{-7}$ | $1.19 \times 10^{-4}$ | 3.75  | 25 |
| GO:0045860 | positive regulation of protein kinase activity                          | BP | $3.00 \times 10^{-7}$ | $1.25 \times 10^{-4}$ | 5.23  | 17 |
| GO:0032434 | regulation of proteasomal ubiquitin-dependent protein catabolic process | BP | $3.26 \times 10^{-7}$ | $1.35 \times 10^{-4}$ | 11.54 | 9  |
| GO:0071396 | cellular response to lipid                                              | BP | $4.06 \times 10^{-7}$ | $1.67 \times 10^{-4}$ | 5.12  | 17 |
| GO:0051253 | negative regulation of RNA metabolic process                            | BP | $4.32 \times 10^{-7}$ | $1.78 \times 10^{-4}$ | 3.30  | 29 |
| GO:0043408 | regulation of MAPK cascade                                              | BP | $4.37 \times 10^{-7}$ | $1.80 \times 10^{-4}$ | 4.21  | 21 |
| GO:0002684 | positive regulation of immune system process                            | BP | $4.42 \times 10^{-7}$ | $1.81 \times 10^{-4}$ | 3.90  | 23 |
| GO:0051403 | stress-activated MAPK cascade                                           | BP | $4.74 \times 10^{-7}$ | $1.94 \times 10^{-4}$ | 6.74  | 13 |
| GO:0005126 | cytokine receptor binding                                               | MF | $4.81 \times 10^{-7}$ | $1.96 \times 10^{-4}$ | 7.41  | 12 |
| GO:0048545 | response to steroid hormone                                             | BP | $4.81 \times 10^{-7}$ | $1.96 \times 10^{-4}$ | 7.41  | 12 |
| GO:0006913 | nucleocytoplasmic transport                                             | BP | $5.03 \times 10^{-7}$ | $2.05 \times 10^{-4}$ | 6.70  | 13 |
| GO:0051248 | negative regulation of protein metabolic process                        | BP | $5.58 \times 10^{-7}$ | $2.26 \times 10^{-4}$ | 3.51  | 26 |
| GO:0060548 | negative regulation of cell death                                       | BP | $5.75 \times 10^{-7}$ | $2.33 \times 10^{-4}$ | 3.85  | 23 |
| GO:0035690 | cellular response to drug                                               | BP | $5.99 \times 10^{-7}$ | $2.42 \times 10^{-4}$ | 6.60  | 13 |
| GO:0044388 | small protein activating enzyme binding                                 | MF | $6.38 \times 10^{-7}$ | $2.57 \times 10^{-4}$ | 57.14 | 4  |
| GO:0045862 | positive regulation of proteolysis                                      | BP | $6.93 \times 10^{-7}$ | $2.79 \times 10^{-4}$ | 5.58  | 15 |
| GO:2001242 | regulation of intrinsic apoptotic signaling pathway                     | BP | $7.06 \times 10^{-7}$ | $2.83 \times 10^{-4}$ | 7.97  | 11 |
| GO:0043068 | positive regulation of programmed cell death                            | BP | $7.27 \times 10^{-7}$ | $2.91 \times 10^{-4}$ | 4.44  | 19 |
| GO:1901222 | regulation of NIK/NF-kappaB signaling                                   | BP | $7.59 \times 10^{-7}$ | $3.03 \times 10^{-4}$ | 10.47 | 9  |
| GO:0045934 | negative regulation of nucleobase-containing compound metabolic process | BP | $7.76 \times 10^{-7}$ | $3.09 \times 10^{-4}$ | 3.07  | 31 |
| GO:0008625 | extrinsic apoptotic signaling pathway via death domain receptors        | BP | $8.05 \times 10^{-7}$ | $3.20 \times 10^{-4}$ | 12.50 | 8  |
| GO:0034612 | response to tumor necrosis factor                                       | BP | $9.72 \times 10^{-7}$ | $3.85 \times 10^{-4}$ | 6.94  | 12 |
| GO:0031400 | negative regulation of protein modification process                     | BP | $1.06 \times 10^{-6}$ | $4.20 \times 10^{-4}$ | 4.33  | 19 |
| GO:0044403 | symbiont process                                                        | BP | $1.11 \times 10^{-6}$ | $4.38 \times 10^{-4}$ | 4.76  | 17 |
| GO:0009968 | negative regulation of signal transduction                              | BP | $1.22 \times 10^{-6}$ | $4.79 \times 10^{-4}$ | 3.28  | 27 |

|            |                                                                                              |    |                       |                       |       |    |
|------------|----------------------------------------------------------------------------------------------|----|-----------------------|-----------------------|-------|----|
| GO:0071363 | cellular response to growth factor stimulus                                                  | BP | $1.24 \times 10^{-6}$ | $4.85 \times 10^{-4}$ | 4.49  | 18 |
| GO:1905897 | regulation of response to endoplasmic reticulum stress                                       | BP | $1.29 \times 10^{-6}$ | $5.05 \times 10^{-4}$ | 11.76 | 8  |
| GO:0034614 | cellular response to reactive oxygen species                                                 | BP | $1.35 \times 10^{-6}$ | $5.26 \times 10^{-4}$ | 9.78  | 9  |
| GO:0016477 | cell migration                                                                               | BP | $1.96 \times 10^{-6}$ | $7.63 \times 10^{-4}$ | 3.13  | 28 |
| GO:0044445 | cytosolic part                                                                               | CC | $1.97 \times 10^{-6}$ | $7.66 \times 10^{-4}$ | 6.49  | 12 |
| GO:0031647 | regulation of protein stability                                                              | BP | $2.39 \times 10^{-6}$ | $9.19 \times 10^{-4}$ | 5.41  | 14 |
| GO:0045892 | negative regulation of transcription. DNA-templated                                          | BP | $2.40 \times 10^{-6}$ | $9.20 \times 10^{-4}$ | 3.25  | 26 |
| GO:0035821 | modification of morphology or physiology of other                                            | BP | $2.38 \times 10^{-6}$ | $9.20 \times 10^{-4}$ | 7.05  | 11 |
| GO:0051701 | interaction with host                                                                        | BP | $2.39 \times 10^{-6}$ | $9.21 \times 10^{-4}$ | 7.94  | 10 |
| GO:0051240 | positive regulation of multicellular organismal process                                      | BP | $2.48 \times 10^{-6}$ | $9.52 \times 10^{-4}$ | 3.09  | 28 |
| GO:0097435 | supramolecular fiber organization                                                            | BP | $2.80 \times 10^{-6}$ | $1.07 \times 10^{-3}$ | 4.45  | 17 |
| GO:0033138 | positive regulation of peptidyl-serine phosphorylation                                       | BP | $2.96 \times 10^{-6}$ | $1.13 \times 10^{-3}$ | 8.91  | 9  |
| GO:1901214 | regulation of neuron death                                                                   | BP | $2.96 \times 10^{-6}$ | $1.13 \times 10^{-3}$ | 8.91  | 9  |
| GO:0006886 | intracellular protein transport                                                              | BP | $3.00 \times 10^{-6}$ | $1.14 \times 10^{-3}$ | 4.43  | 17 |
| GO:0015031 | protein transport                                                                            | BP | $3.56 \times 10^{-6}$ | $1.35 \times 10^{-3}$ | 3.26  | 25 |
| GO:0045184 | establishment of protein localization                                                        | BP | $3.64 \times 10^{-6}$ | $1.38 \times 10^{-3}$ | 3.10  | 27 |
| GO:0019221 | cytokine-mediated signaling pathway                                                          | BP | $4.00 \times 10^{-6}$ | $1.51 \times 10^{-3}$ | 6.06  | 12 |
| GO:0010035 | response to inorganic substance                                                              | BP | $4.05 \times 10^{-6}$ | $1.52 \times 10^{-3}$ | 5.17  | 14 |
| GO:0009895 | negative regulation of catabolic process                                                     | BP | $4.31 \times 10^{-6}$ | $1.61 \times 10^{-3}$ | 5.53  | 13 |
| GO:0090322 | regulation of superoxide metabolic process                                                   | BP | $4.83 \times 10^{-6}$ | $1.81 \times 10^{-3}$ | 22.73 | 5  |
| GO:0097342 | riposome                                                                                     | CC | $5.79 \times 10^{-6}$ | $2.16 \times 10^{-3}$ | 36.36 | 4  |
| GO:0032813 | tumor necrosis factor receptor superfamily binding                                           | MF | $5.85 \times 10^{-6}$ | $2.17 \times 10^{-3}$ | 15.38 | 6  |
| GO:0038083 | peptidyl-tyrosine autophosphorylation                                                        | BP | $6.12 \times 10^{-6}$ | $2.27 \times 10^{-3}$ | 21.74 | 5  |
| GO:2000152 | regulation of ubiquitin-specific protease activity                                           | BP | $6.41 \times 10^{-6}$ | $2.37 \times 10^{-3}$ | 75.00 | 3  |
| GO:0051817 | modification of morphology or physiology of other organism involved in symbiotic interaction | BP | $6.98 \times 10^{-6}$ | $2.57 \times 10^{-3}$ | 8.04  | 9  |
| GO:0042177 | negative regulation of protein catabolic process                                             | BP | $7.51 \times 10^{-6}$ | $2.76 \times 10^{-3}$ | 7.96  | 9  |
| GO:0032269 | negative regulation of cellular protein metabolic process                                    | BP | $7.62 \times 10^{-6}$ | $2.80 \times 10^{-3}$ | 3.30  | 23 |
| GO:1901701 | cellular response to oxygen-containing compound                                              | BP | $7.72 \times 10^{-6}$ | $2.83 \times 10^{-3}$ | 3.64  | 20 |
| GO:0051094 | positive regulation of developmental process                                                 | BP | $8.43 \times 10^{-6}$ | $3.08 \times 10^{-3}$ | 3.38  | 22 |
| GO:1901700 | response to oxygen-containing compound                                                       | BP | $8.56 \times 10^{-6}$ | $3.12 \times 10^{-3}$ | 3.28  | 23 |
| GO:0072593 | reactive oxygen species metabolic process                                                    | BP | $8.95 \times 10^{-6}$ | $3.25 \times 10^{-3}$ | 6.85  | 10 |
| GO:0002682 | regulation of immune system process                                                          | BP | $9.23 \times 10^{-6}$ | $3.34 \times 10^{-3}$ | 3.09  | 25 |
| GO:0072657 | protein localization to membrane                                                             | BP | $1.15 \times 10^{-5}$ | $4.17 \times 10^{-3}$ | 4.71  | 14 |
| GO:0018105 | peptidyl-serine phosphorylation                                                              | BP | $1.17 \times 10^{-5}$ | $4.22 \times 10^{-3}$ | 5.45  | 12 |
| GO:0008134 | transcription factor binding                                                                 | MF | $1.21 \times 10^{-5}$ | $4.32 \times 10^{-3}$ | 3.66  | 19 |
| GO:0043130 | ubiquitin binding                                                                            | MF | $1.20 \times 10^{-5}$ | $4.32 \times 10^{-3}$ | 13.64 | 6  |
| GO:2000059 | negative regulation of ubiquitin-dependent protein catabolic process                         | BP | $1.20 \times 10^{-5}$ | $4.32 \times 10^{-3}$ | 13.64 | 6  |
| GO:0032183 | SUMO binding                                                                                 | MF | $1.23 \times 10^{-5}$ | $4.40 \times 10^{-3}$ | 30.77 | 4  |
| GO:0009636 | response to toxic substance                                                                  | BP | $1.28 \times 10^{-5}$ | $4.55 \times 10^{-3}$ | 6.58  | 10 |
| GO:0033365 | protein localization to organelle                                                            | BP | $1.31 \times 10^{-5}$ | $4.64 \times 10^{-3}$ | 3.64  | 19 |
| GO:0042493 | response to drug                                                                             | BP | $1.31 \times 10^{-5}$ | $4.65 \times 10^{-3}$ | 4.16  | 16 |
| GO:0019787 | ubiquitin-like protein transferase activity                                                  | MF | $1.36 \times 10^{-5}$ | $4.81 \times 10^{-3}$ | 4.37  | 15 |
| GO:0017038 | protein import                                                                               | BP | $1.40 \times 10^{-5}$ | $4.93 \times 10^{-3}$ | 7.38  | 9  |
| GO:0031397 | negative regulation of protein ubiquitination                                                | BP | $1.49 \times 10^{-5}$ | $5.24 \times 10^{-3}$ | 10.29 | 7  |
| GO:0045732 | positive regulation of protein catabolic process                                             | BP | $1.51 \times 10^{-5}$ | $5.30 \times 10^{-3}$ | 6.45  | 10 |
| GO:0044003 | modification by symbiont of host morphology or                                               | BP | $1.70 \times 10^{-5}$ | $5.94 \times 10^{-3}$ | 17.86 | 5  |
| GO:0031264 | death-inducing signaling complex                                                             | CC | $1.71 \times 10^{-5}$ | $5.95 \times 10^{-3}$ | 28.57 | 4  |

|            |                                                                                 |    |                       |                       |       |    |
|------------|---------------------------------------------------------------------------------|----|-----------------------|-----------------------|-------|----|
| GO:0051788 | response to misfolded protein                                                   | BP | $1.71 \times 10^{-5}$ | $5.95 \times 10^{-3}$ | 28.57 | 4  |
| GO:0045595 | regulation of cell differentiation                                              | BP | $1.72 \times 10^{-5}$ | $5.95 \times 10^{-3}$ | 3.14  | 23 |
| GO:0002020 | protease binding                                                                | MF | $1.82 \times 10^{-5}$ | $6.28 \times 10^{-3}$ | 7.14  | 9  |
| GO:0010243 | response to organonitrogen compound                                             | BP | $1.98 \times 10^{-5}$ | $6.82 \times 10^{-3}$ | 4.02  | 16 |
| GO:0016234 | inclusion body                                                                  | CC | $2.04 \times 10^{-5}$ | $7.01 \times 10^{-3}$ | 8.16  | 8  |
| GO:0042826 | histone deacetylase binding                                                     | MF | $2.20 \times 10^{-5}$ | $7.53 \times 10^{-3}$ | 8.08  | 8  |
| GO:0051702 | interaction with symbiont                                                       | BP | $2.20 \times 10^{-5}$ | $7.53 \times 10^{-3}$ | 8.08  | 8  |
| GO:1903364 | positive regulation of cellular protein catabolic process                       | BP | $2.20 \times 10^{-5}$ | $7.53 \times 10^{-3}$ | 8.08  | 8  |
| GO:0043254 | regulation of protein complex assembly                                          | BP | $2.23 \times 10^{-5}$ | $7.62 \times 10^{-3}$ | 4.44  | 14 |
| GO:0005164 | tumor necrosis factor receptor binding                                          | MF | $2.31 \times 10^{-5}$ | $7.88 \times 10^{-3}$ | 26.67 | 4  |
| GO:0005615 | extracellular space                                                             | CC | $2.48 \times 10^{-5}$ | $8.45 \times 10^{-3}$ | 3.15  | 22 |
| GO:0033209 | tumor necrosis factor-mediated signaling pathway                                | BP | $2.61 \times 10^{-5}$ | $8.85 \times 10^{-3}$ | 9.46  | 7  |
| GO:0001819 | positive regulation of cytokine production                                      | BP | $2.84 \times 10^{-5}$ | $9.60 \times 10^{-3}$ | 4.35  | 14 |
| GO:0007250 | activation of NF-kappaB-inducing kinase activity                                | BP | $3.05 \times 10^{-5}$ | $1.03 \times 10^{-2}$ | 25.00 | 4  |
| GO:1990381 | ubiquitin-specific protease binding                                             | MF | $3.05 \times 10^{-5}$ | $1.03 \times 10^{-2}$ | 25.00 | 4  |
| GO:0005114 | type II transforming growth factor beta receptor binding                        | MF | $3.15 \times 10^{-5}$ | $1.06 \times 10^{-2}$ | 50.00 | 3  |
| GO:0043256 | laminin complex                                                                 | CC | $3.15 \times 10^{-5}$ | $1.06 \times 10^{-2}$ | 50.00 | 3  |
| GO:0072717 | cellular response to actinomycin D                                              | BP | $3.15 \times 10^{-5}$ | $1.06 \times 10^{-2}$ | 50.00 | 3  |
| GO:0001817 | regulation of cytokine production                                               | BP | $3.16 \times 10^{-5}$ | $1.06 \times 10^{-2}$ | 3.70  | 17 |
| GO:0006952 | defense response                                                                | BP | $3.43 \times 10^{-5}$ | $1.15 \times 10^{-2}$ | 3.18  | 21 |
| GO:1902532 | negative regulation of intracellular signal transduction                        | BP | $3.48 \times 10^{-5}$ | $1.16 \times 10^{-2}$ | 3.84  | 16 |
| GO:0006974 | cellular response to DNA damage stimulus                                        | BP | $3.78 \times 10^{-5}$ | $1.25 \times 10^{-2}$ | 3.26  | 20 |
| GO:0071248 | cellular response to metal ion                                                  | BP | $3.86 \times 10^{-5}$ | $1.28 \times 10^{-2}$ | 7.48  | 8  |
| GO:0016032 | viral process                                                                   | BP | $3.90 \times 10^{-5}$ | $1.29 \times 10^{-2}$ | 4.50  | 13 |
| GO:1900407 | regulation of cellular response to oxidative stress                             | BP | $4.00 \times 10^{-5}$ | $1.32 \times 10^{-2}$ | 11.11 | 6  |
| GO:0009725 | response to hormone                                                             | BP | $4.24 \times 10^{-5}$ | $1.39 \times 10^{-2}$ | 4.19  | 14 |
| GO:0045597 | positive regulation of cell differentiation                                     | BP | $4.25 \times 10^{-5}$ | $1.39 \times 10^{-2}$ | 3.77  | 16 |
| GO:0000122 | negative regulation of transcription by RNA polymerase                          | BP | $4.44 \times 10^{-5}$ | $1.45 \times 10^{-2}$ | 3.45  | 18 |
| GO:2001243 | negative regulation of intrinsic apoptotic signaling                            | BP | $4.70 \times 10^{-5}$ | $1.53 \times 10^{-2}$ | 8.64  | 7  |
| GO:0046907 | intracellular transport                                                         | BP | $4.78 \times 10^{-5}$ | $1.55 \times 10^{-2}$ | 3.02  | 22 |
| GO:0010038 | response to metal ion                                                           | BP | $4.98 \times 10^{-5}$ | $1.61 \times 10^{-2}$ | 5.62  | 10 |
| GO:0070513 | death domain binding                                                            | MF | $5.04 \times 10^{-5}$ | $1.62 \times 10^{-2}$ | 22.22 | 4  |
| GO:0043491 | protein kinase B signaling                                                      | BP | $5.23 \times 10^{-5}$ | $1.68 \times 10^{-2}$ | 6.25  | 9  |
| GO:0004062 | aryl sulfotransferase activity                                                  | MF | $5.46 \times 10^{-5}$ | $1.75 \times 10^{-2}$ | 42.86 | 3  |
| GO:0051170 | import into nucleus                                                             | BP | $5.95 \times 10^{-5}$ | $1.90 \times 10^{-2}$ | 8.33  | 7  |
| GO:0045321 | leukocyte activation                                                            | BP | $6.02 \times 10^{-5}$ | $1.91 \times 10^{-2}$ | 4.06  | 14 |
| GO:0070266 | necroptotic process                                                             | BP | $6.05 \times 10^{-5}$ | $1.92 \times 10^{-2}$ | 13.89 | 5  |
| GO:1901699 | cellular response to nitrogen compound                                          | BP | $6.21 \times 10^{-5}$ | $1.96 \times 10^{-2}$ | 4.05  | 14 |
| GO:0044390 | ubiquitin-like protein conjugating enzyme binding                               | MF | $6.32 \times 10^{-5}$ | $1.99 \times 10^{-2}$ | 21.05 | 4  |
| GO:0000902 | cell morphogenesis                                                              | BP | $6.77 \times 10^{-5}$ | $2.13 \times 10^{-2}$ | 4.26  | 13 |
| GO:0046330 | positive regulation of JNK cascade                                              | BP | $6.87 \times 10^{-5}$ | $2.15 \times 10^{-2}$ | 6.90  | 8  |
| GO:0004672 | protein kinase activity                                                         | MF | $7.75 \times 10^{-5}$ | $2.42 \times 10^{-2}$ | 3.59  | 16 |
| GO:0043410 | positive regulation of MAPK cascade                                             | BP | $7.93 \times 10^{-5}$ | $2.47 \times 10^{-2}$ | 3.95  | 14 |
| GO:0052547 | regulation of peptidase activity                                                | BP | $8.13 \times 10^{-5}$ | $2.52 \times 10^{-2}$ | 4.48  | 12 |
| GO:0001085 | RNA polymerase II transcription factor binding                                  | MF | $8.24 \times 10^{-5}$ | $2.55 \times 10^{-2}$ | 6.72  | 8  |
| GO:0072594 | establishment of protein localization to organelle                              | BP | $8.36 \times 10^{-5}$ | $2.57 \times 10^{-2}$ | 4.82  | 11 |
| GO:1903351 | cellular response to dopamine                                                   | BP | $8.66 \times 10^{-5}$ | $2.66 \times 10^{-2}$ | 37.50 | 3  |
| GO:1903800 | positive regulation of production of miRNAs involved in gene silencing by miRNA | BP | $8.66 \times 10^{-5}$ | $2.66 \times 10^{-2}$ | 37.50 | 3  |

|            |                                                                                                                                                  |    |                       |                       |       |    |
|------------|--------------------------------------------------------------------------------------------------------------------------------------------------|----|-----------------------|-----------------------|-------|----|
| GO:0036473 | cell death in response to oxidative stress                                                                                                       | BP | $8.80 \times 10^{-5}$ | $2.69 \times 10^{-2}$ | 9.68  | 6  |
| GO:0051341 | regulation of oxidoreductase activity                                                                                                            | BP | $9.63 \times 10^{-5}$ | $2.94 \times 10^{-2}$ | 9.52  | 6  |
| GO:0010952 | positive regulation of peptidase activity                                                                                                        | BP | $9.73 \times 10^{-5}$ | $2.96 \times 10^{-2}$ | 5.77  | 9  |
| GO:0009896 | positive regulation of catabolic process                                                                                                         | BP | $1.06 \times 10^{-4}$ | $3.22 \times 10^{-2}$ | 4.08  | 13 |
| GO:0050730 | regulation of peptidyl-tyrosine phosphorylation                                                                                                  | BP | $1.07 \times 10^{-4}$ | $3.23 \times 10^{-2}$ | 5.13  | 10 |
| GO:0035966 | response to topologically incorrect protein                                                                                                      | BP | $1.15 \times 10^{-4}$ | $3.46 \times 10^{-2}$ | 9.23  | 6  |
| GO:0045672 | positive regulation of osteoclast differentiation                                                                                                | BP | $1.29 \times 10^{-4}$ | $3.86 \times 10^{-2}$ | 33.33 | 3  |
| GO:0051900 | regulation of mitochondrial depolarization                                                                                                       | BP | $1.29 \times 10^{-4}$ | $3.86 \times 10^{-2}$ | 33.33 | 3  |
| GO:0051099 | positive regulation of binding                                                                                                                   | BP | $1.36 \times 10^{-4}$ | $4.07 \times 10^{-2}$ | 5.52  | 9  |
| GO:2001234 | negative regulation of apoptotic signaling pathway                                                                                               | BP | $1.36 \times 10^{-4}$ | $4.07 \times 10^{-2}$ | 5.52  | 9  |
| GO:0030225 | macrophage differentiation                                                                                                                       | BP | $1.39 \times 10^{-4}$ | $4.15 \times 10^{-2}$ | 17.39 | 4  |
| GO:0002718 | regulation of cytokine production involved in immune response                                                                                    | BP | $1.45 \times 10^{-4}$ | $4.29 \times 10^{-2}$ | 11.63 | 5  |
| GO:0002824 | positive regulation of adaptive immune response based on somatic recombination of immune receptors built from immunoglobulin superfamily domains | BP | $1.45 \times 10^{-4}$ | $4.29 \times 10^{-2}$ | 11.63 | 5  |
| GO:0051881 | regulation of mitochondrial membrane potential                                                                                                   | BP | $1.45 \times 10^{-4}$ | $4.29 \times 10^{-2}$ | 11.63 | 5  |
| GO:1903573 | negative regulation of response to endoplasmic reticulum stress                                                                                  | BP | $1.45 \times 10^{-4}$ | $4.29 \times 10^{-2}$ | 11.63 | 5  |
| GO:0031330 | negative regulation of cellular catabolic process                                                                                                | BP | $1.49 \times 10^{-4}$ | $4.40 \times 10^{-2}$ | 4.93  | 10 |
| GO:0046777 | protein autophosphorylation                                                                                                                      | BP | $1.55 \times 10^{-4}$ | $4.57 \times 10^{-2}$ | 4.90  | 10 |
| GO:0050776 | regulation of immune response                                                                                                                    | BP | $1.69 \times 10^{-4}$ | $4.96 \times 10^{-2}$ | 3.50  | 15 |

MF (molecular function), BP (biological process), CC (cellular component)

**Supplementary Table S13.** GO analysis of the extended interactome of integrated blood markers linked to the long-term anti-TNF response in CD patients.

| GO ID      | GO term                                                      | ontology<br>source | p-value               | adjusted<br>p-value   | % assoc.<br>genes | nr. assoc.<br>genes |
|------------|--------------------------------------------------------------|--------------------|-----------------------|-----------------------|-------------------|---------------------|
| GO:0005874 | microtubule                                                  | CC                 | $1.73 \times 10^{-9}$ | $1.90 \times 10^{-8}$ | 5.29              | 10                  |
| GO:0070507 | regulation of microtubule cytoskeleton organization          | BP                 | $2.09 \times 10^{-7}$ | $2.09 \times 10^{-6}$ | 4.71              | 8                   |
| GO:0051010 | microtubule plus-end binding                                 | MF                 | $1.07 \times 10^{-5}$ | $9.63 \times 10^{-5}$ | 25.00             | 3                   |
| GO:0008017 | microtubule binding                                          | MF                 | $3.69 \times 10^{-5}$ | $2.96 \times 10^{-4}$ | 4.95              | 5                   |
| GO:0031110 | regulation of microtubule polymerization or depolymerization | BP                 | $4.86 \times 10^{-5}$ | $3.40 \times 10^{-4}$ | 7.41              | 4                   |
| GO:0004843 | thiol-dependent ubiquitin-specific protease activity         | MF                 | $2.48 \times 10^{-4}$ | $1.49 \times 10^{-3}$ | 4.88              | 4                   |
| GO:0019887 | protein kinase regulator activity                            | MF                 | $8.12 \times 10^{-4}$ | $2.44 \times 10^{-3}$ | 3.57              | 4                   |
| GO:0072698 | protein localization to microtubule cytoskeleton             | BP                 | $5.53 \times 10^{-4}$ | $2.76 \times 10^{-3}$ | 6.98              | 3                   |
| GO:0016579 | protein deubiquitination                                     | BP                 | $7.85 \times 10^{-4}$ | $3.14 \times 10^{-3}$ | 3.60              | 4                   |
| GO:1902554 | serine/threonine protein kinase complex                      | CC                 | $3.83 \times 10^{-3}$ | $3.83 \times 10^{-3}$ | 3.57              | 3                   |
| GO:0042102 | positive regulation of T cell proliferation                  | BP                 | $2.38 \times 10^{-3}$ | $4.76 \times 10^{-3}$ | 4.23              | 3                   |

MF (molecular function), BP (biological process), CC (cellular component)
