# Supplementary material for: Pre-Treatment Biomarkers of Anti-Tumour Necrosis Factor Therapy Response in Crohn’s Disease—A Systematic Review and Gene Ontology Analysis
Source: MDPI journal article supplement (doi:10.3390/cells8060515), 2019-05-28
Supplement: s1 [file s1]

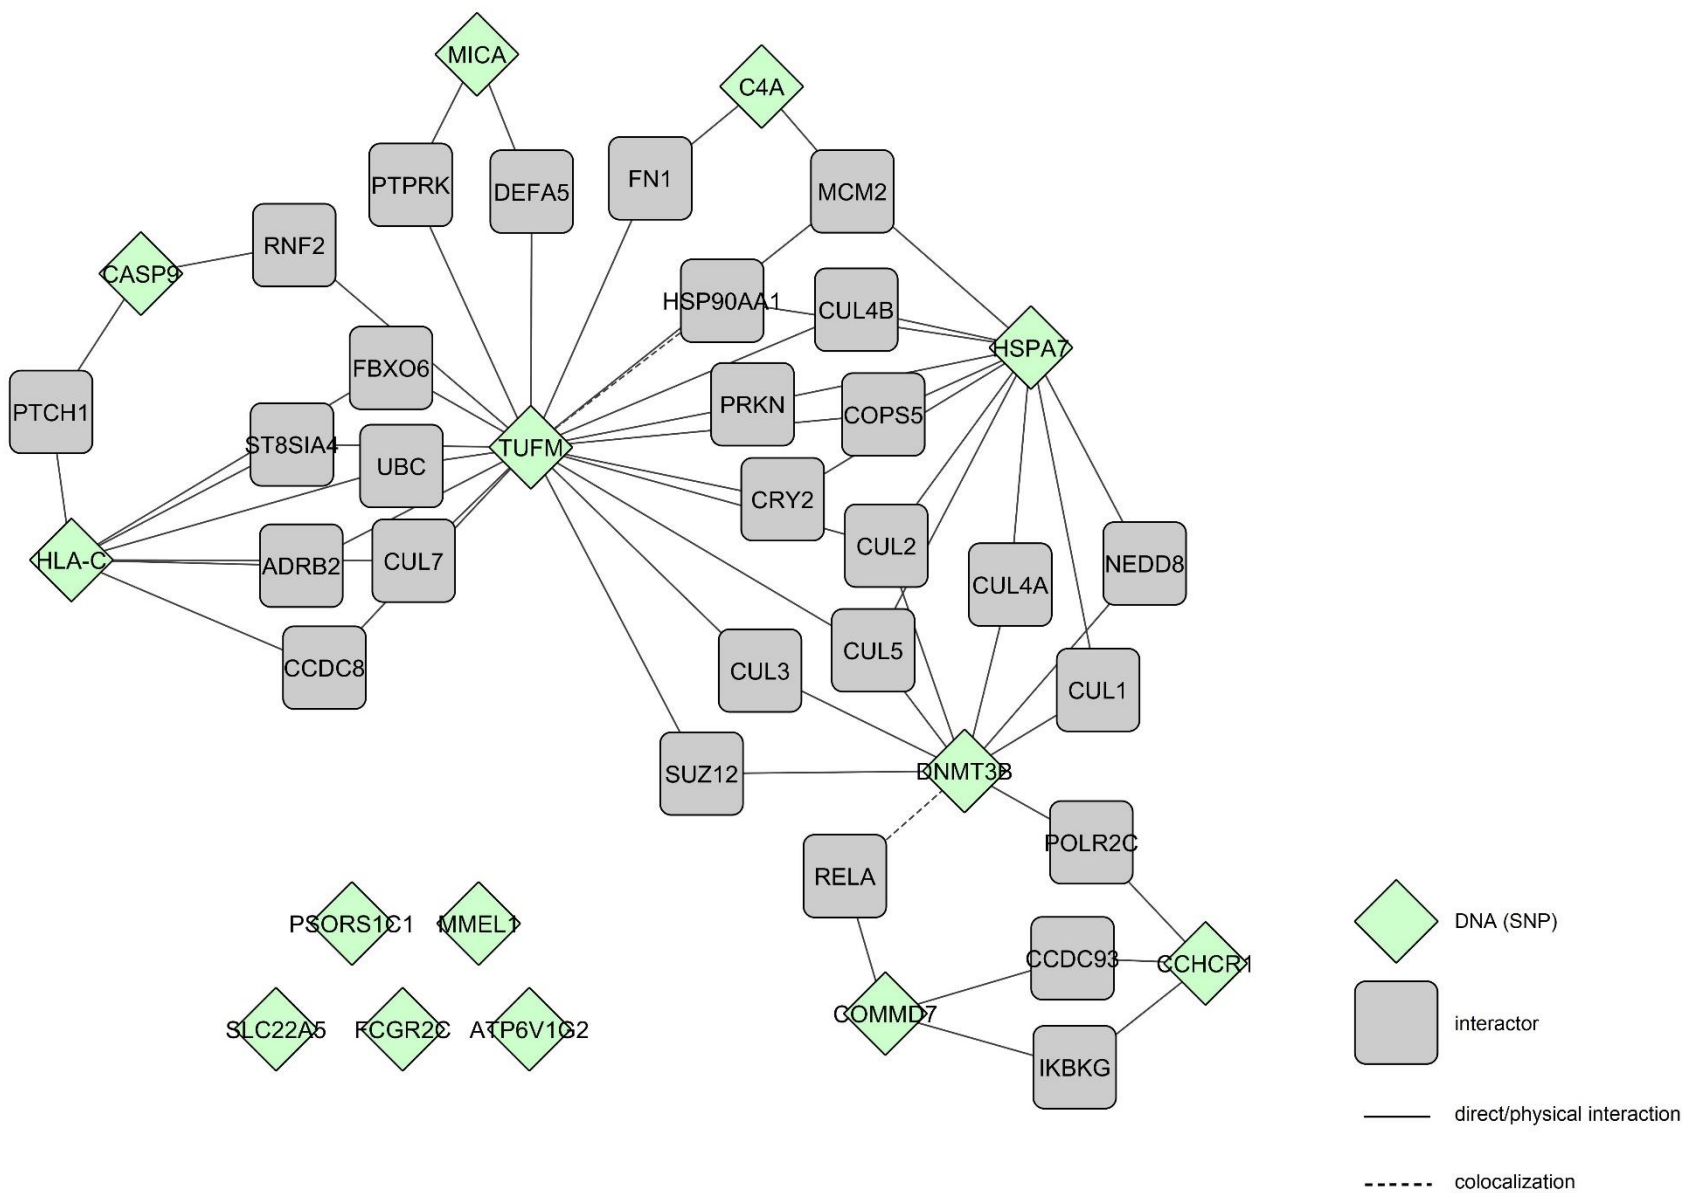

**Supplementary Figure S3.** Extended interactome of the integrated colon markers linked to the long-term anti-TNF therapy response in CD patients. Different forms represent markers measured at different levels of expression. Lines represent direct protein-protein interactions.
